# Supplementary material
Source: PubMed Central journal article supplement (PMC2533437)

# SUPPORTING INFORMATION

## Synthesis of Photoactivatable Analogues of Lysophosphatidic Acid and Covalent Labeling of Plasma Proteins

Zaiguo Li,<sup>1</sup> Daniel L. Baker,<sup>2,3</sup> Gabor Tigyi,<sup>3,4</sup> and Robert Bittman<sup>1\*</sup>

<sup>1</sup>*Department of Chemistry and Biochemistry, Queens College of the City University of New York, Flushing, New York 11367-1597*

<sup>2</sup>*Department of Medicine and the Vascular Biology and Genomics & Bioinformatics Centers of Excellence, The University of Tennessee Health Science Center, Memphis, TN 38163*

<sup>3</sup>*The University of Tennessee Cancer Institute, Memphis, Tennessee 38163*

<sup>4</sup>*Department of Physiology, The University of Tennessee Health Science Center, Memphis, Tennessee 38163*

[robert.bittman@qc.cuny.edu](mailto:robert.bittman@qc.cuny.edu)

### Table of Contents

| PAGE | CONTENT                                                                                                                 |
|------|-------------------------------------------------------------------------------------------------------------------------|
| S2   | General Information                                                                                                     |
| S2   | Enzymatic Incorporation of [ <sup>32</sup> P]-Phosphate into <b>1</b> , <b>2</b> , <b>4</b> , <b>20</b> , and <b>27</b> |
| S3   | Covalent Modification of Plasma Proteins                                                                                |
| S3   | Synthesis of Compound <b>9</b>                                                                                          |
| S3   | Synthesis of Compound <b>10</b>                                                                                         |
| S4   | <sup>1</sup> H NMR of Compound <b>10</b>                                                                                |
| S5   | <sup>13</sup> C NMR of Compound <b>10</b>                                                                               |
| S6   | <sup>1</sup> H NMR of Compound <b>11</b>                                                                                |
| S7   | <sup>13</sup> C NMR of Compound <b>11</b>                                                                               |
| S8   | <sup>1</sup> H NMR of Compound <b>12</b>                                                                                |
| S9   | <sup>13</sup> C NMR of Compound <b>12</b>                                                                               |
| S10  | <sup>1</sup> H NMR of Compound <b>13</b>                                                                                |
| S11  | <sup>13</sup> C NMR of Compound <b>13</b>                                                                               |
| S12  | <sup>1</sup> H NMR of Compound <b>14</b>                                                                                |
| S13  | <sup>13</sup> C NMR of Compound <b>14</b>                                                                               |
| S14  | <sup>1</sup> H NMR of Compound <b>15</b>                                                                                |
| S15  | <sup>13</sup> C NMR of Compound <b>15</b>                                                                               |
| S16  | <sup>1</sup> H NMR of Compound <b>16</b>                                                                                |
| S17  | <sup>13</sup> C NMR of Compound <b>16</b>                                                                               |
| S18  | <sup>1</sup> H NMR of Compound <b>17</b>                                                                                |
| S19  | <sup>13</sup> C NMR of Compound <b>17</b>                                                                               |
| S20  | <sup>1</sup> H NMR of Compound <b>18</b>                                                                                |

|     |                                           |
|-----|-------------------------------------------|
| S21 | <sup>13</sup> C NMR of Compound <b>18</b> |
| S22 | <sup>1</sup> H NMR of Compound <b>19</b>  |
| S23 | <sup>13</sup> C NMR of Compound <b>19</b> |
| S24 | <sup>1</sup> H NMR of Compound <b>20</b>  |
| S25 | <sup>13</sup> C NMR of Compound <b>20</b> |
| S26 | <sup>1</sup> H NMR of Compound <b>23</b>  |
| S27 | <sup>13</sup> C NMR of Compound <b>23</b> |
| S28 | <sup>1</sup> H NMR of Compound <b>24</b>  |
| S29 | <sup>13</sup> C NMR of Compound <b>24</b> |
| S30 | <sup>1</sup> H NMR of Compound <b>25</b>  |
| S31 | <sup>13</sup> C NMR of Compound <b>25</b> |
| S32 | <sup>1</sup> H NMR of Compound <b>26</b>  |
| S33 | <sup>13</sup> C NMR of Compound <b>26</b> |
| S34 | <sup>1</sup> H NMR of Compound <b>27</b>  |
| S35 | <sup>13</sup> C NMR of Compound <b>27</b> |
| S36 | <sup>1</sup> H NMR of Compound <b>28</b>  |
| S37 | <sup>13</sup> C NMR of Compound <b>28</b> |
| S38 | <sup>1</sup> H NMR of Compound <b>30</b>  |
| S39 | <sup>13</sup> C NMR of Compound <b>30</b> |
| S40 | <sup>1</sup> H NMR of Compound <b>31</b>  |
| S41 | <sup>13</sup> C NMR of Compound <b>31</b> |
| S42 | <sup>1</sup> H NMR of Compound <b>32</b>  |
| S43 | <sup>13</sup> C NMR of Compound <b>32</b> |
| S44 | <sup>1</sup> H NMR of Compound <b>33</b>  |
| S45 | <sup>13</sup> C NMR of Compound <b>33</b> |
| S46 | <sup>1</sup> H NMR of Compound <b>34</b>  |
| S47 | <sup>13</sup> C NMR of Compound <b>34</b> |
| S48 | <sup>1</sup> H NMR of Compound <b>35</b>  |
| S49 | <sup>13</sup> C NMR of Compound <b>35</b> |

**General Information.** <sup>1</sup>H and <sup>13</sup>C NMR spectra were recorded in CDCl<sub>3</sub> (unless otherwise noted) at 400 and 100 MHz, respectively. The reference chemical shifts for CDCl<sub>3</sub> were δ 7.27 (<sup>1</sup>H) and 77.0 ppm (<sup>13</sup>C). TLC was carried out on 0.25-mm thick silica gel 60 F254 aluminum sheets. Visualization was with 10% sulfuric acid solution in EtOH. Flash chromatography was carried out with 230-400 mesh silica gel. The solvents were dried with the following reagents and distilled before use: CH<sub>2</sub>Cl<sub>2</sub> (CaH<sub>2</sub>); HMPA (CaH<sub>2</sub>); THF (sodium/benzophenone).

**Enzymatic Incorporation of [<sup>32</sup>P]-Phosphate into Benzophenone-Containing Analogues with DGK.** This protocol is a modification of a previously reported method.<sup>S1</sup> Twenty-five nmol of analogue **1**, **2**, **4**, **20**, or **27** was added to pH 6.6 buffer containing 20 mM imidazole, 20 mM NaCl, 40 mM, MgCl<sub>2</sub>, 55 μM EDTA, 55 μM EGTA, 5.5 mM DTT, and 100 μg of DGK (recombinant protein expressed in *E. coli*). The reaction was started on addition of γ-[<sup>32</sup>P]-ATP (8.33 nmol, 30 Ci/mmol), and the

reaction mixture was shaken at 37 °C for 2 h. After the mixture was dried under vacuum, the desired products were purified by TLC (CHCl<sub>3</sub>/Me<sub>2</sub>CO/HOAc/MeOH/H<sub>2</sub>O 50:20:15:10:5). Radioactive spots were visualized by autoradiography using X-ray film, scraped from the plate, and extracted with MeOH. Final concentrations were determined by liquid-scintillation counting using 30 Ci/mmol as the specific activity.

**Covalent Modification of Plasma Proteins.** EDTA-anticoagulated plasma from Sprague Dawley (19.4 mg albumin/mL) or Nagase rats (0.4 mg albumin/mL) was diluted to 5% in phosphate-buffered saline containing 10% DMSO and 50 nM [<sup>32</sup>P]-benzophenone-containing analogue. Samples were preincubated in the dark for 20 min and then exposed to UV (365 nm) for up to 10 min on ice using a Spectrolinker XL-1500 crosslinker. Samples (20 µL) were diluted with equal volumes of 2 x loading buffer, incubated at 37 °C for 3 h, and separated by 12% SDS-PAGE. Gels were equilibrated in 10% aqueous glycerol and dried under vacuum at 50 °C for 2 h. Radioactive bands were visualized by autoradiography using X-ray film and an intensifying screen at -80 °C.

**Dec-9-yn-1-ol (9).** Compound **9** was prepared by a reported procedure<sup>S2</sup> in 90% yield. <sup>1</sup>H NMR δ 1.22-1.62 (m, 12H), 1.89 (t, 1H, *J* = 2.8 Hz), 2.11 (m, 2H), 2.97 (br s, 1H), 3.53 (t, 2H, *J* = 6.4 Hz); <sup>13</sup>C NMR δ 18.1, 25.5, 28.2, 28.5, 28.9, 29.1, 32.4, 62.4, 68.0, 84.5.

**2-(Dec-9-ynyloxy)-tetrahydro-2H-pyran (10).** To a solution of **9** (2.50 g, 16.2 mmol) and dihydropyran (2.04 g, 24.3 mmol) in 15 mL of dry CH<sub>2</sub>Cl<sub>2</sub>, 100 mg (0.40 mmol) of PPTS was added and the mixture was stirred overnight at room temperature. After the addition of saturated aqueous NaHCO<sub>3</sub> (15 mL), the organic layer was separated and dried (Na<sub>2</sub>SO<sub>4</sub>). The solvent was removed to give 3.84 g (99%) of **10** as a colorless oil. <sup>1</sup>H NMR δ 1.19-1.84 (m, 18H), 1.87 (q, 1H, *J* = 2.4 Hz), 2.05-2.15 (m, 2H), 3.25-3.35 (m, 1H), 3.38-3.48 (m, 1H), 3.61-3.69 (m, 1H), 3.75-3.83 (m, 1H), 4.46-4.53 (m, 1H); <sup>13</sup>C NMR δ 18.1, 19.4, 25.3, 26.0, 28.2, 28.5, 28.8, 29.1, 29.5, 30.6, 62.0, 67.3, 68.0, 84.3, 98.5; HR-MS [MNa<sup>+</sup>] *m/z* calcd for C<sub>15</sub>H<sub>26</sub>O<sub>2</sub>Na 261.1825, found 261.1827.

(S1) Waggoner, D. W.; Gómez-Muñoz, A.; Dewald, J.; Brindley, D. N. *J. Biol. Chem.* **1996**, *271*, 16506-16509.

(S2) Abrams, S. R.; Shaw, A. C. *Org. Synth. Coll.* Vol. 8, 146-148.

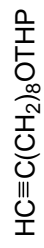

10

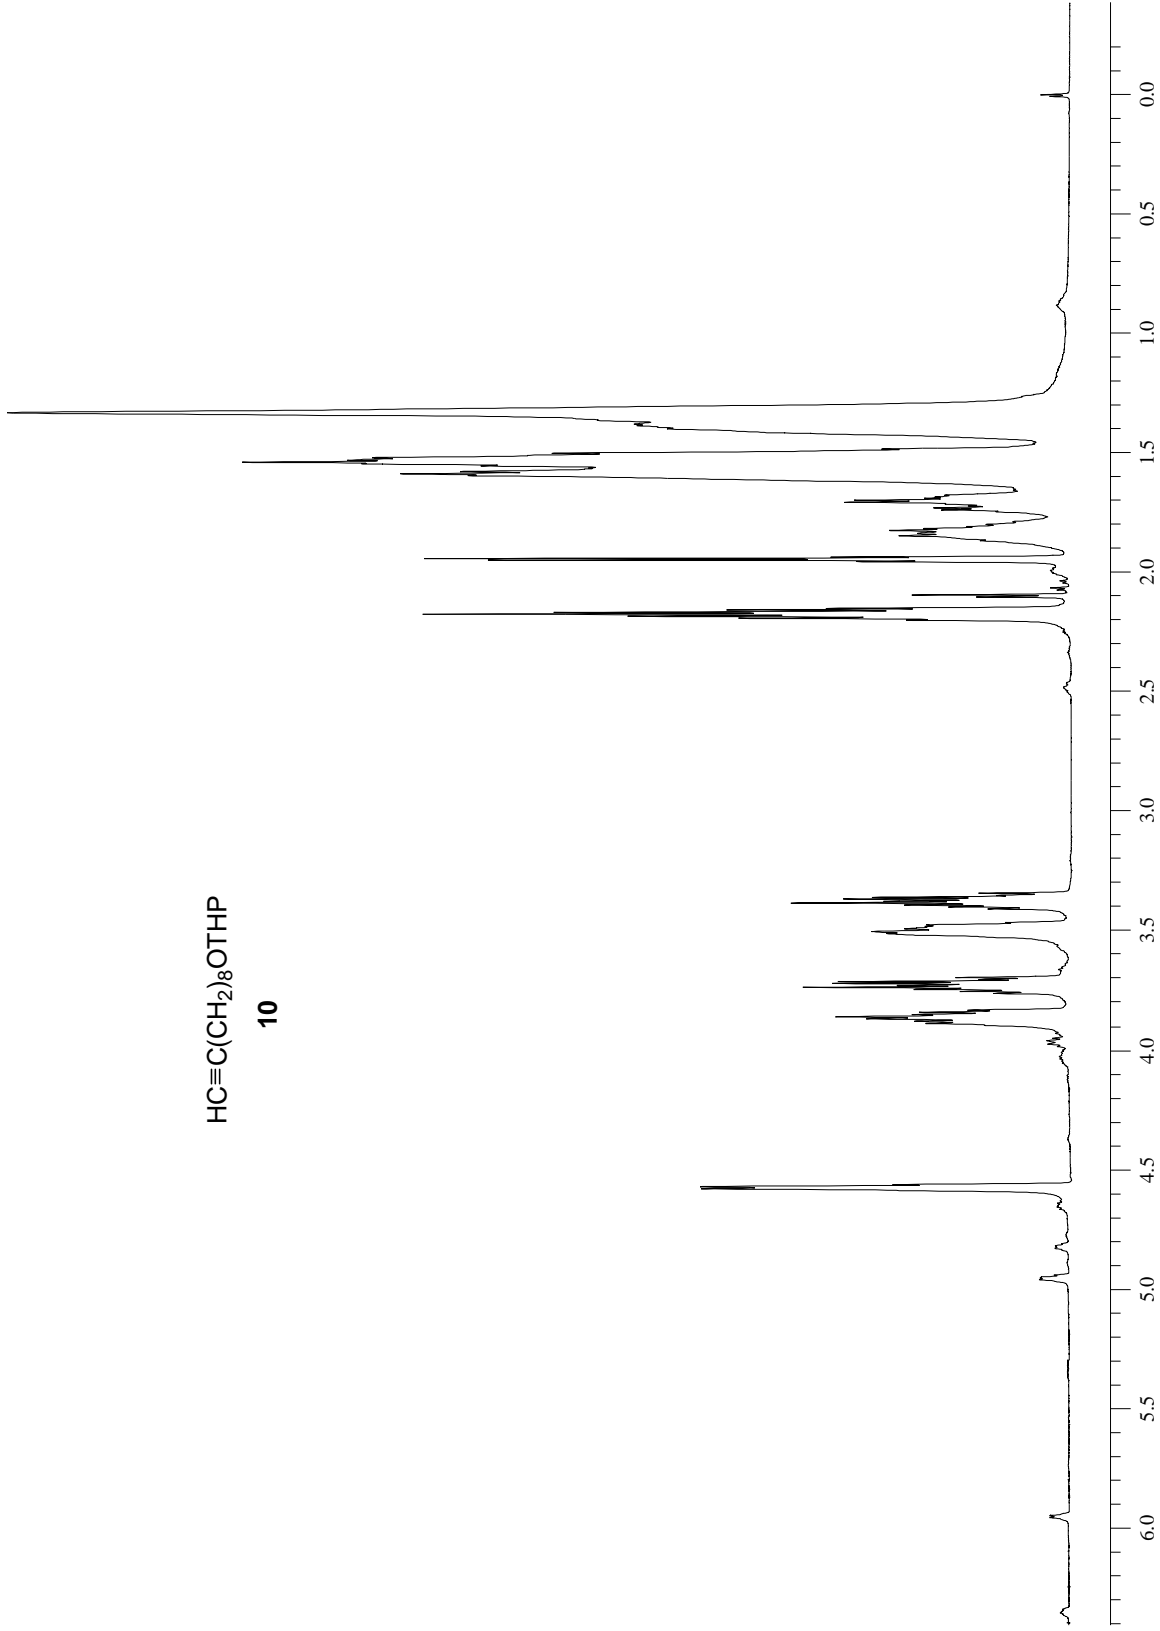

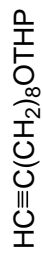

10

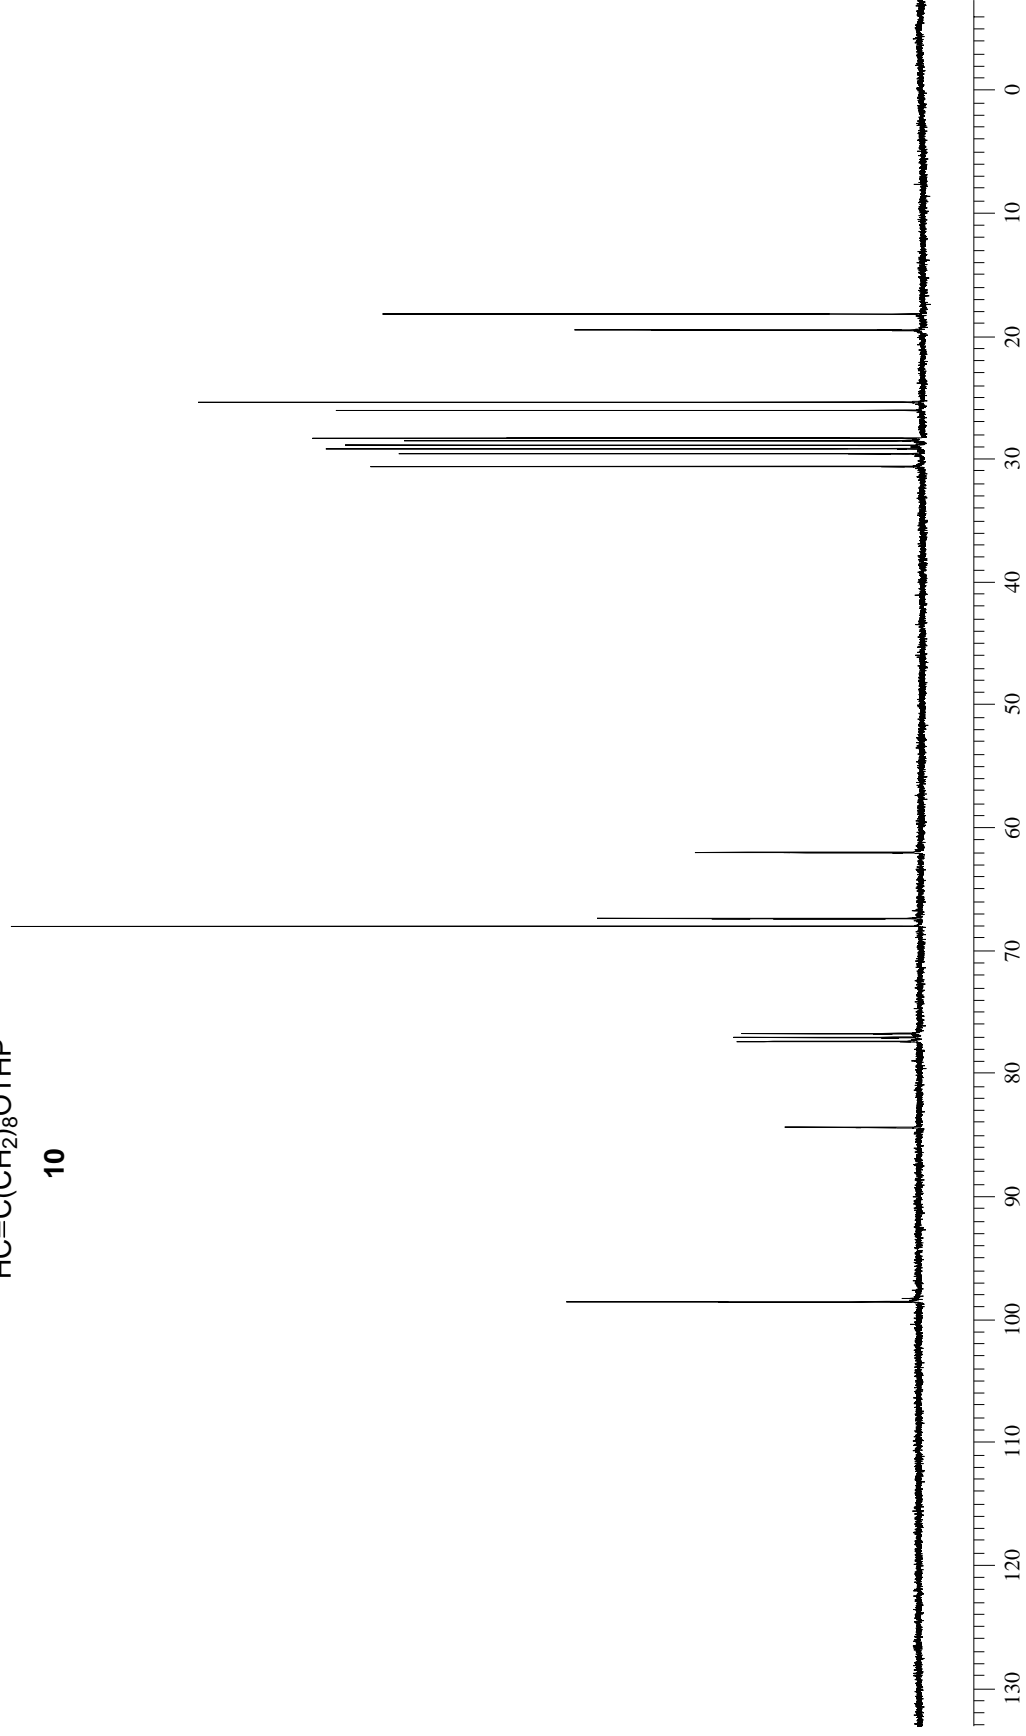

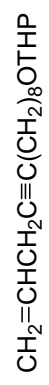

11

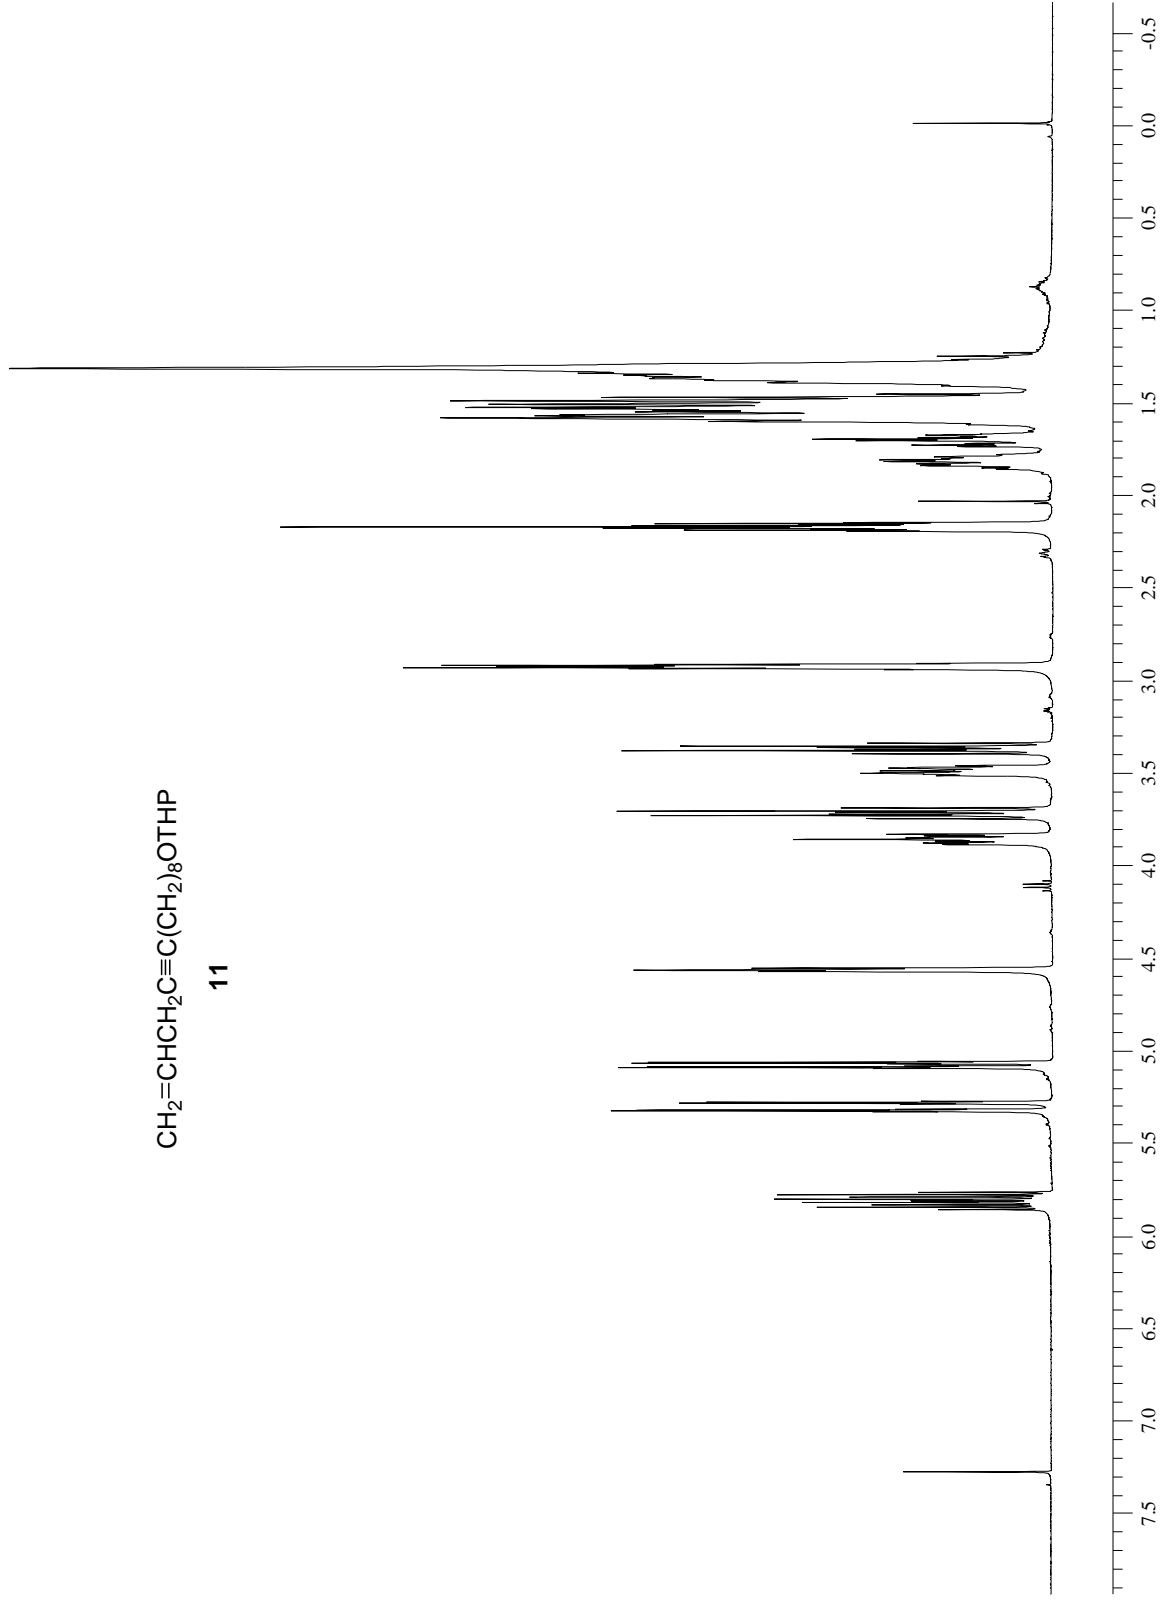

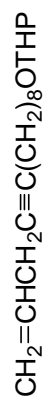

11

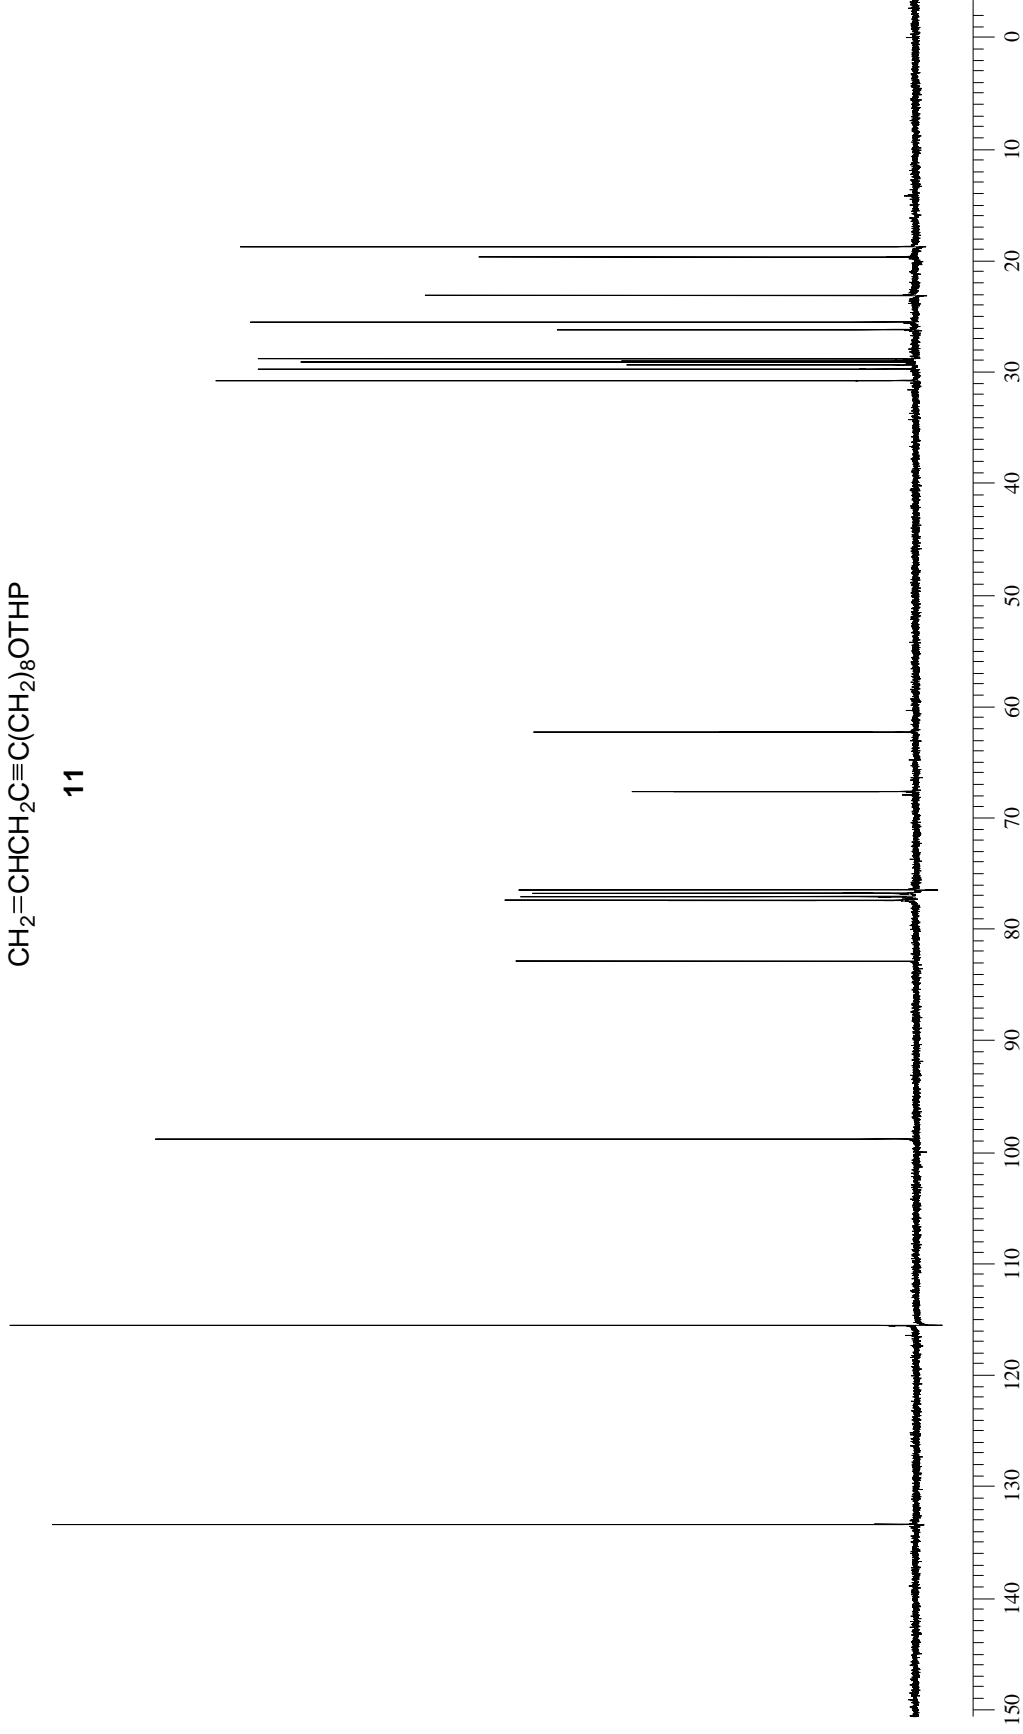

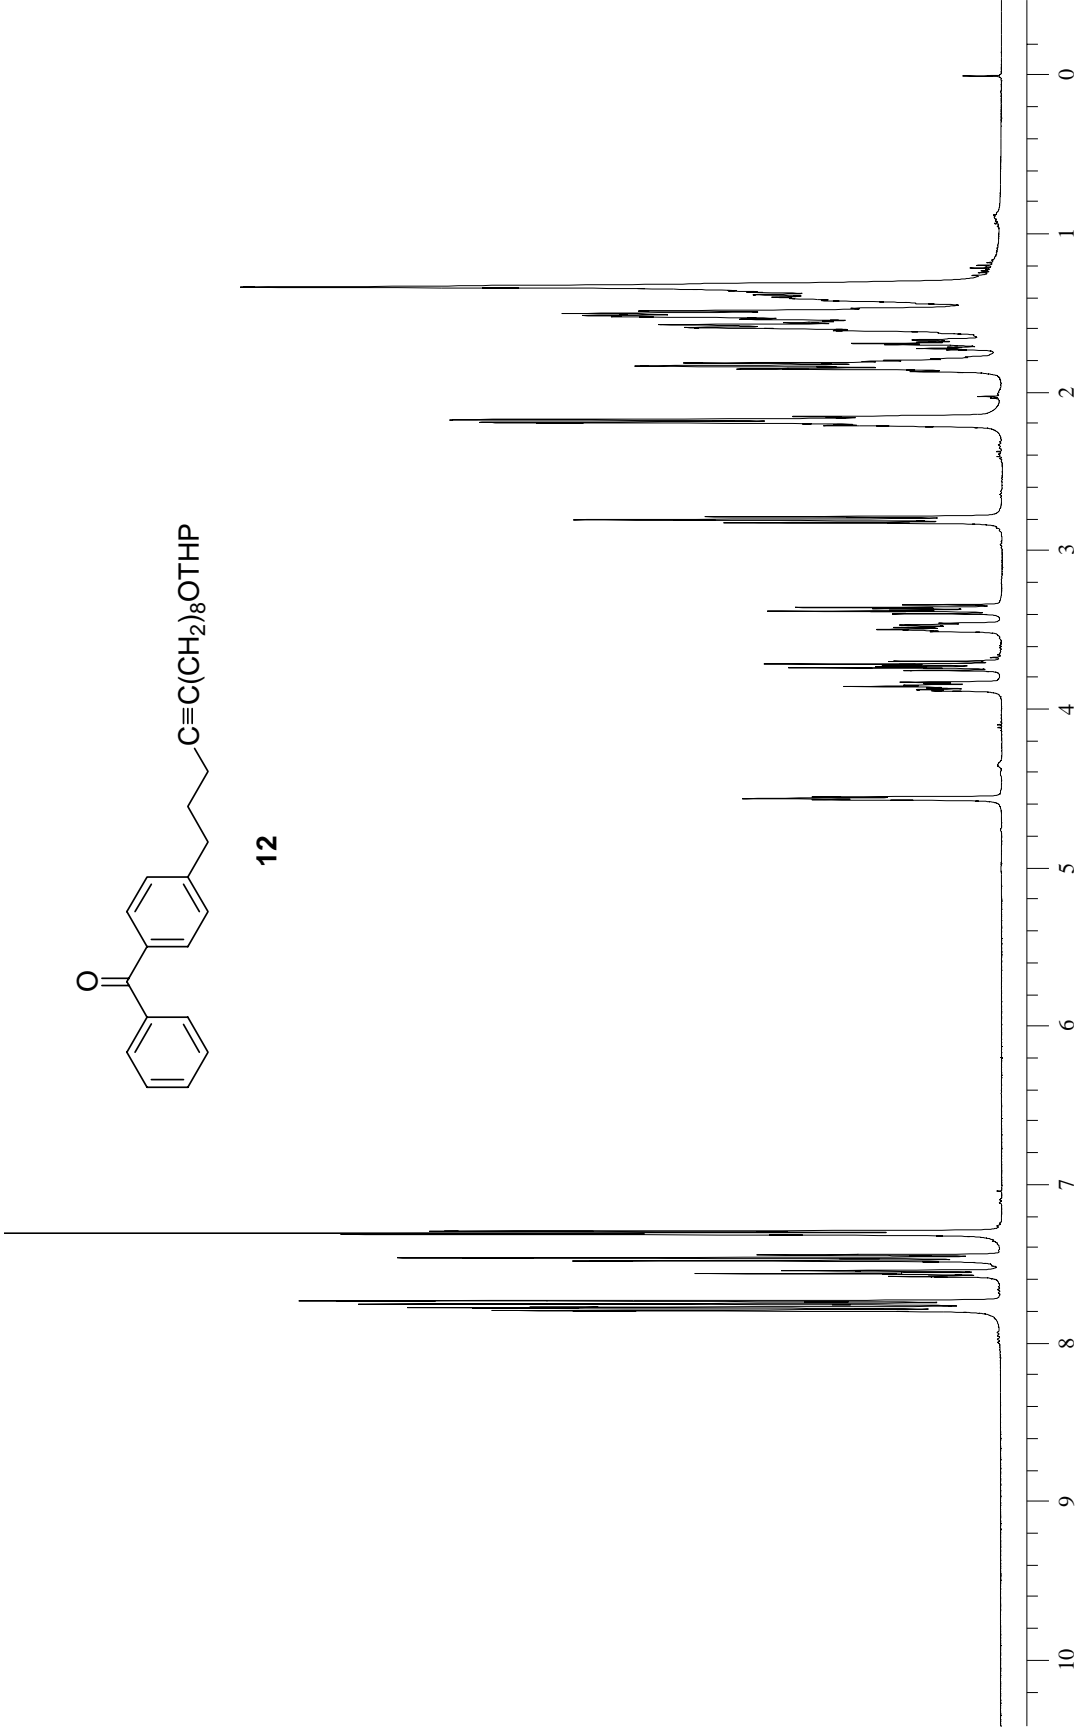



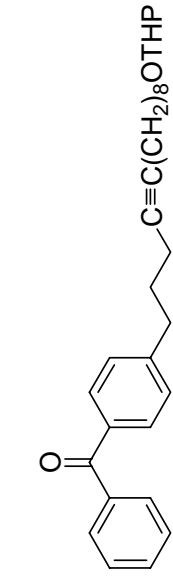

12

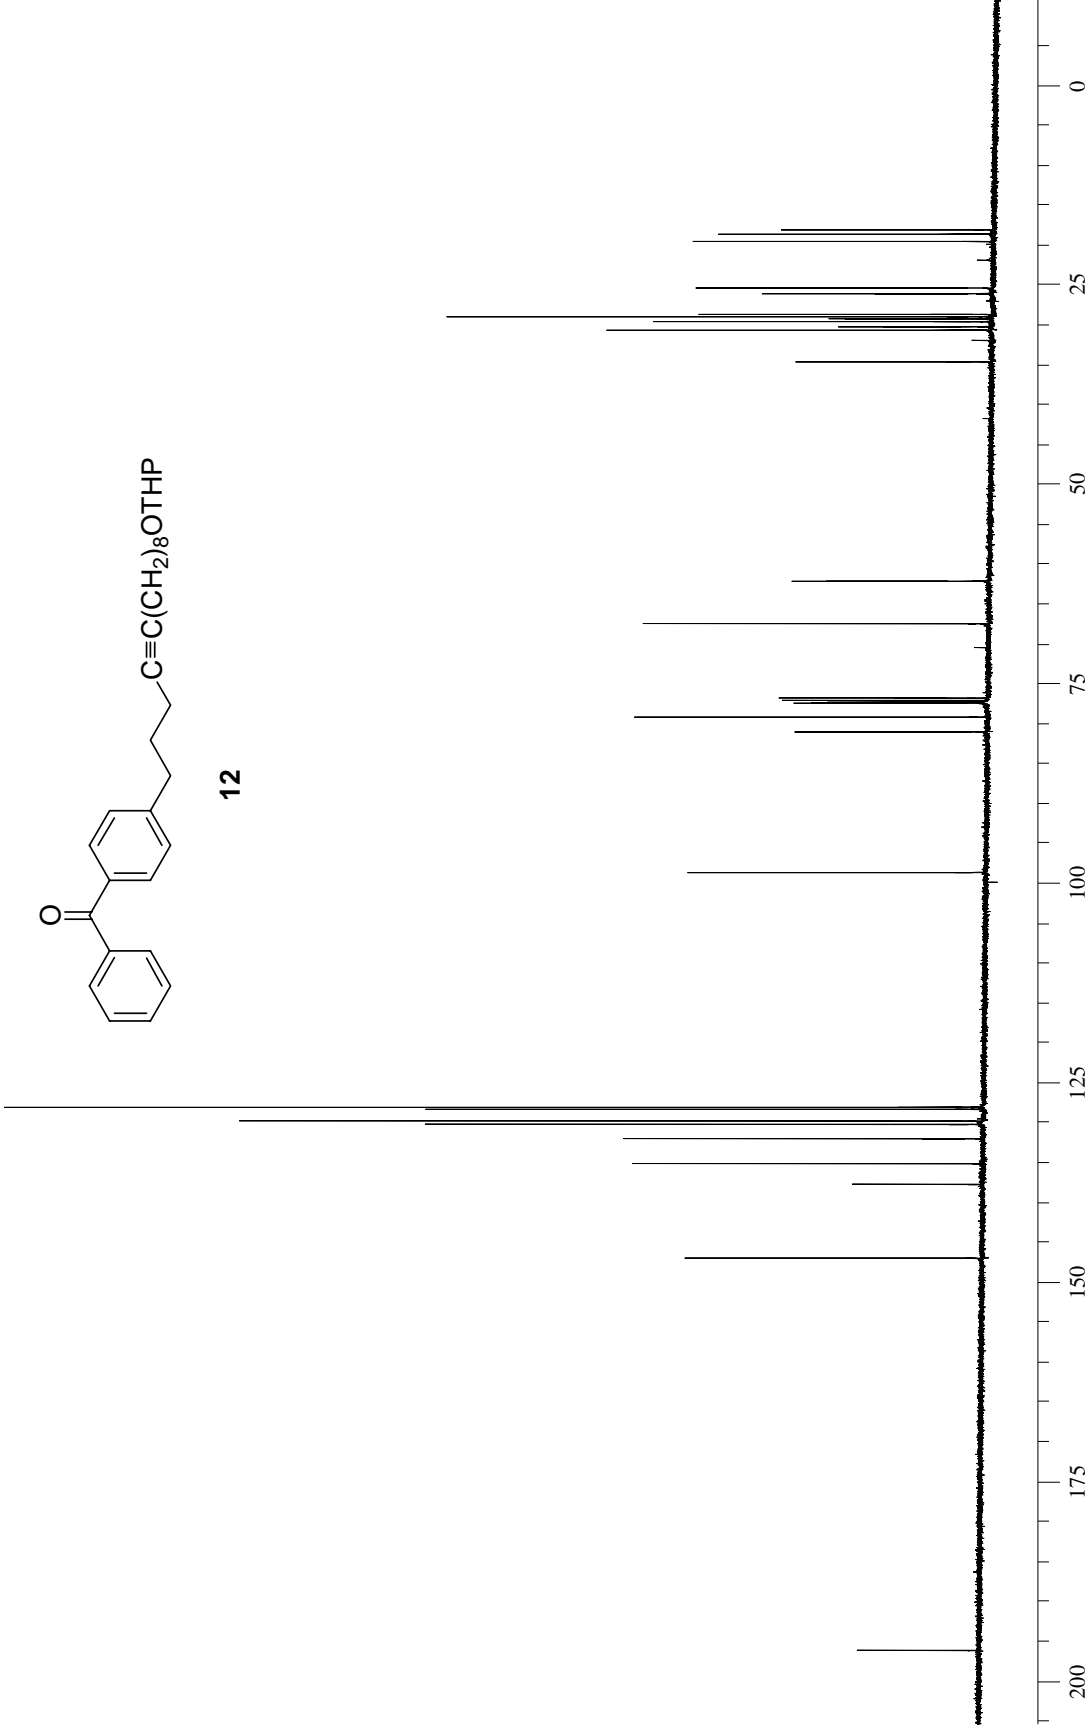

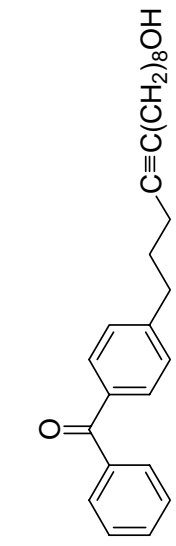

13

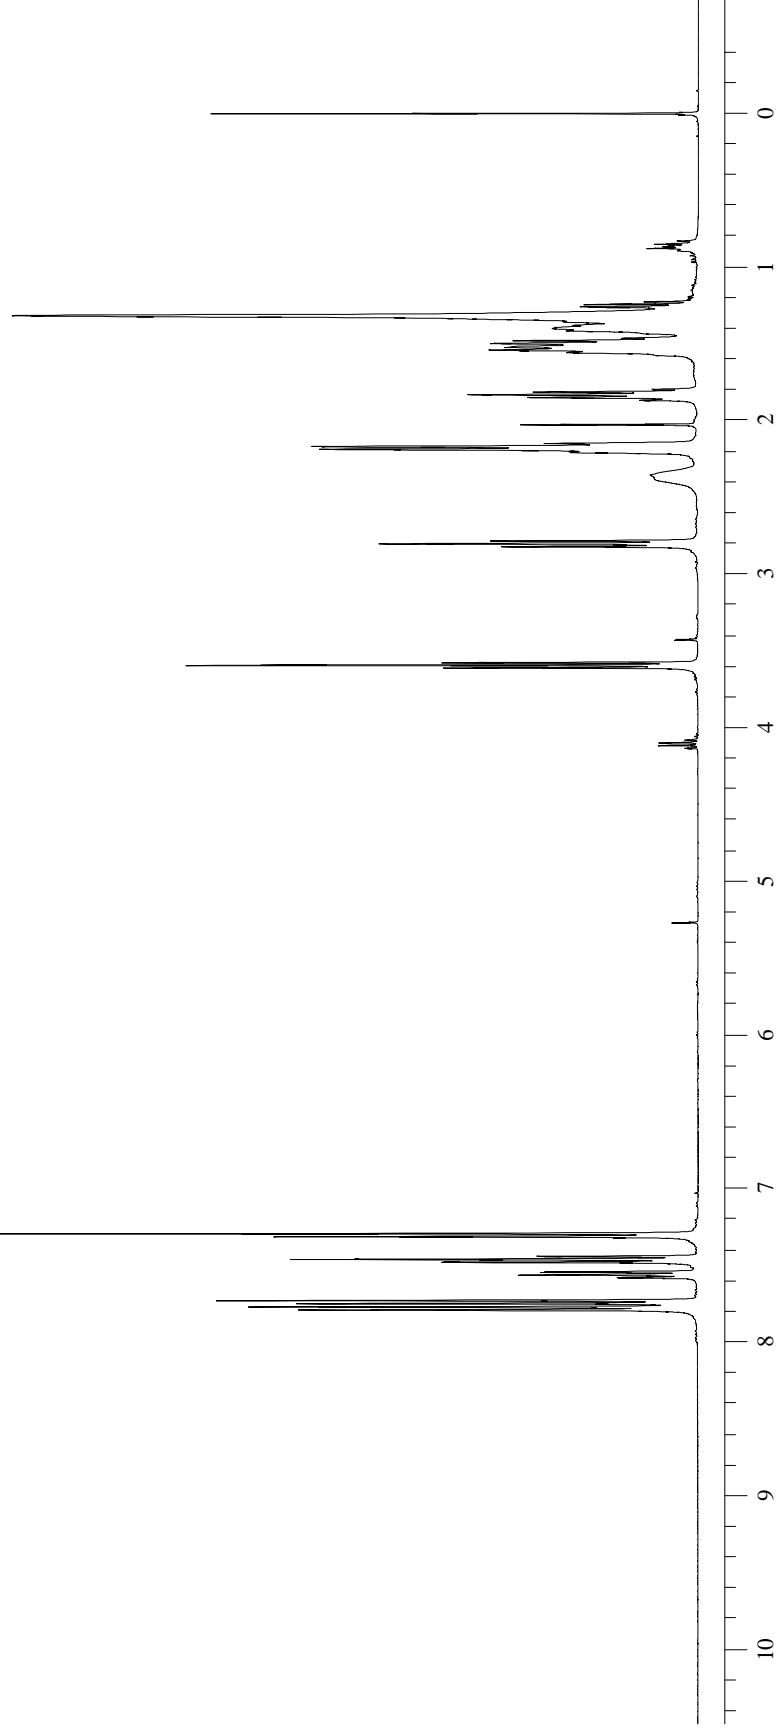

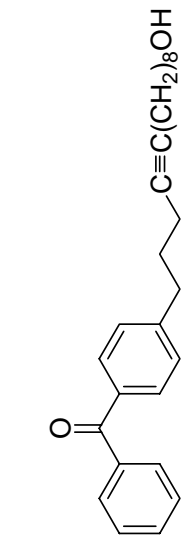

13

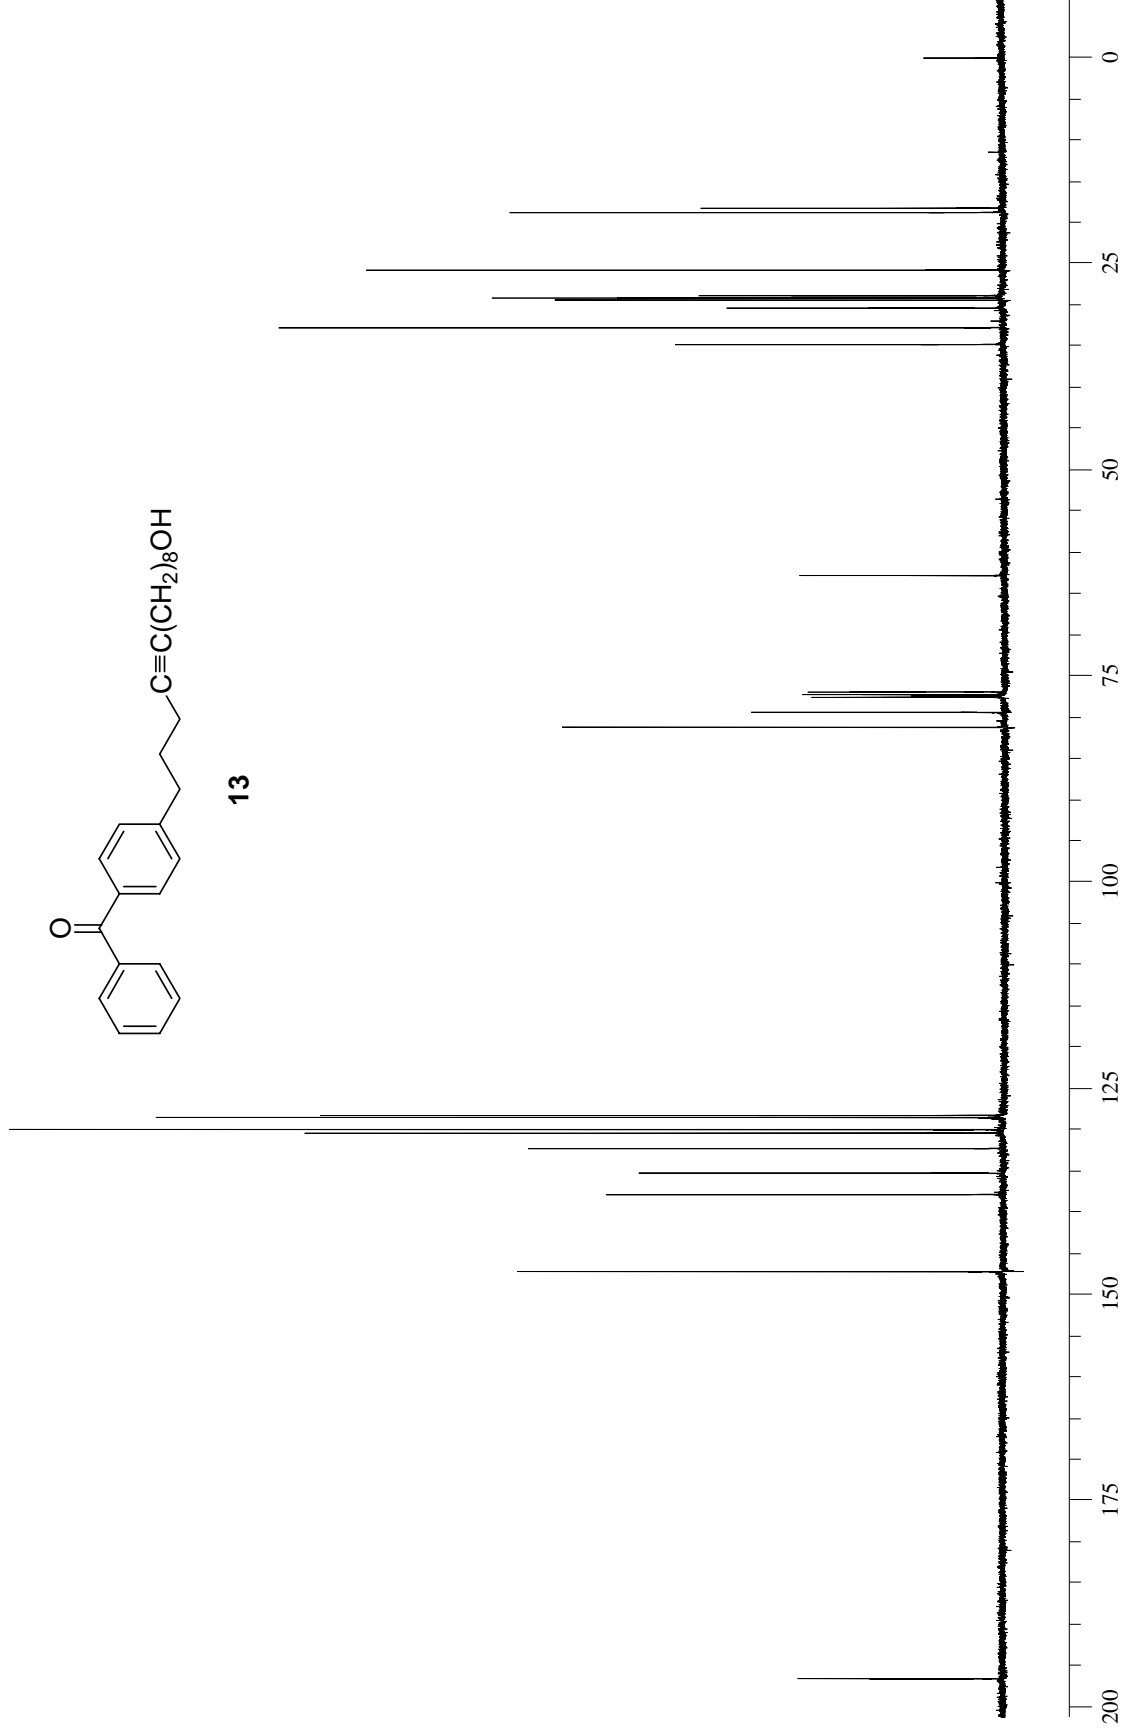

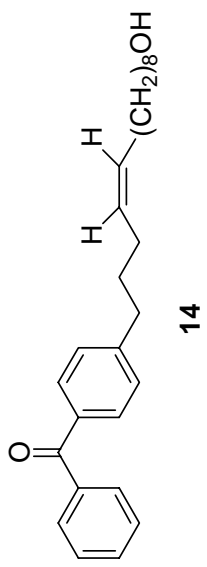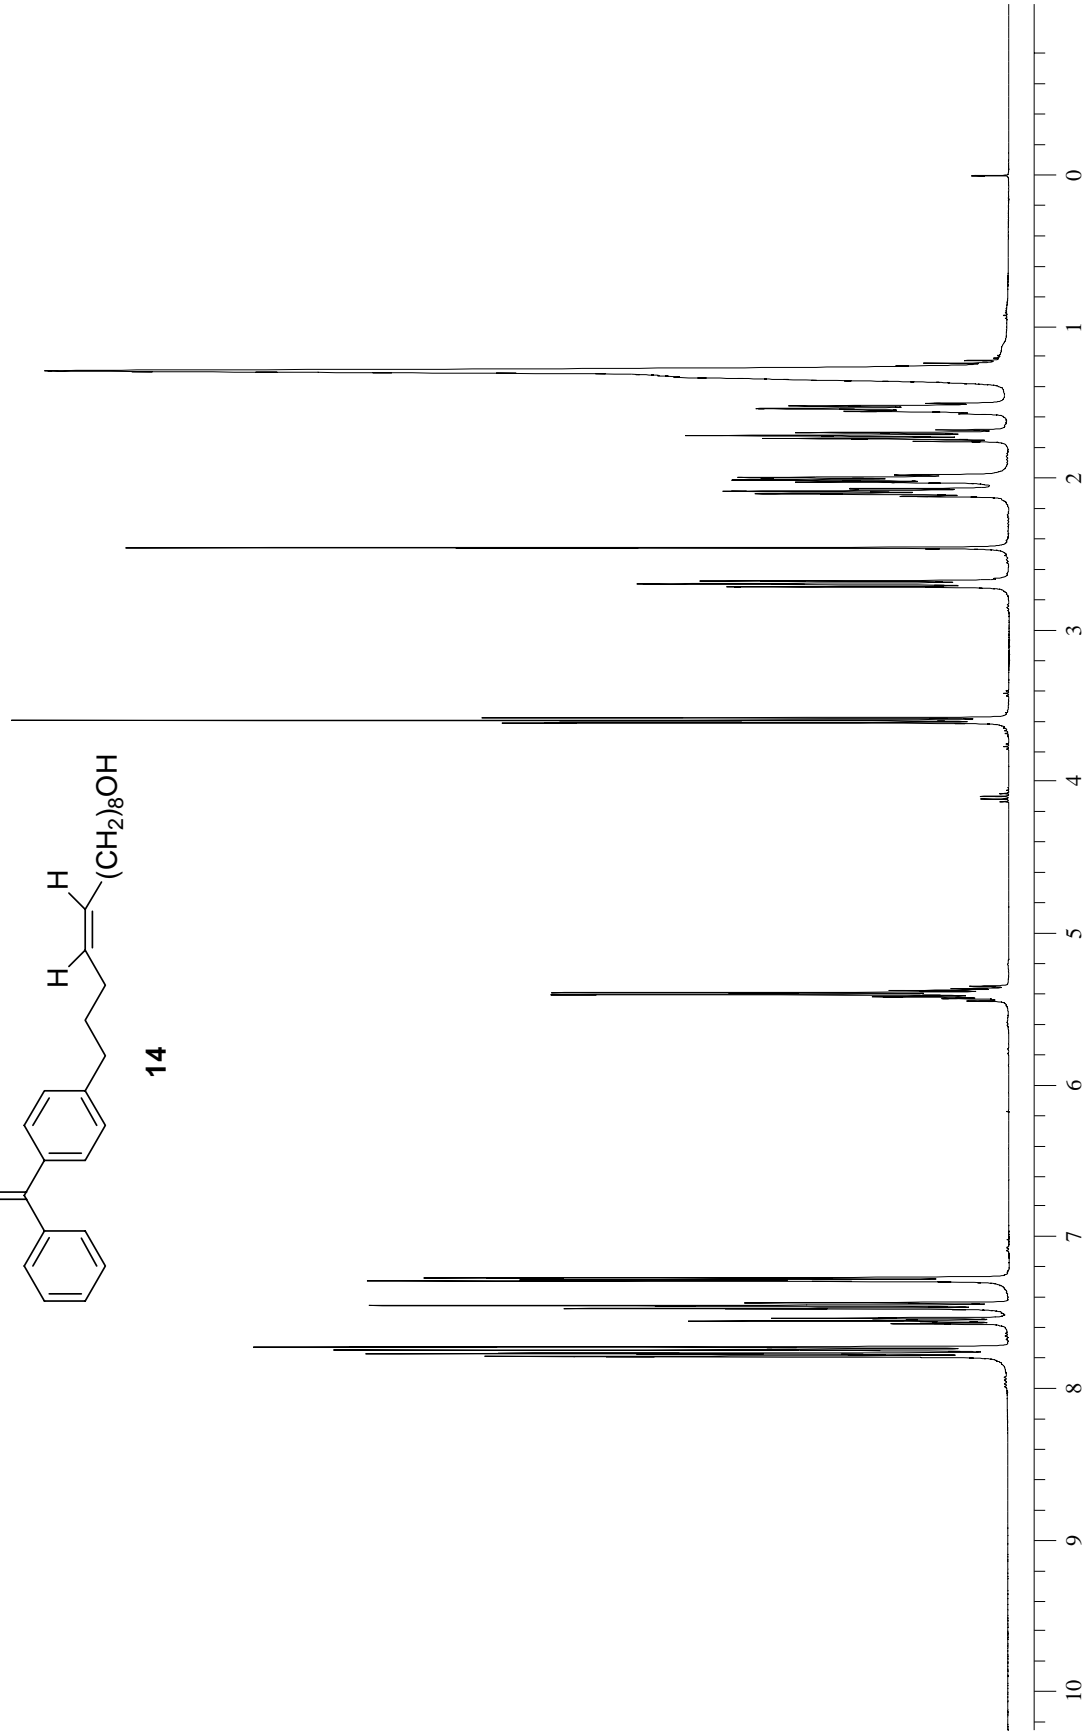

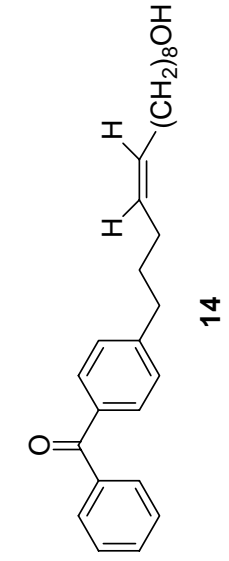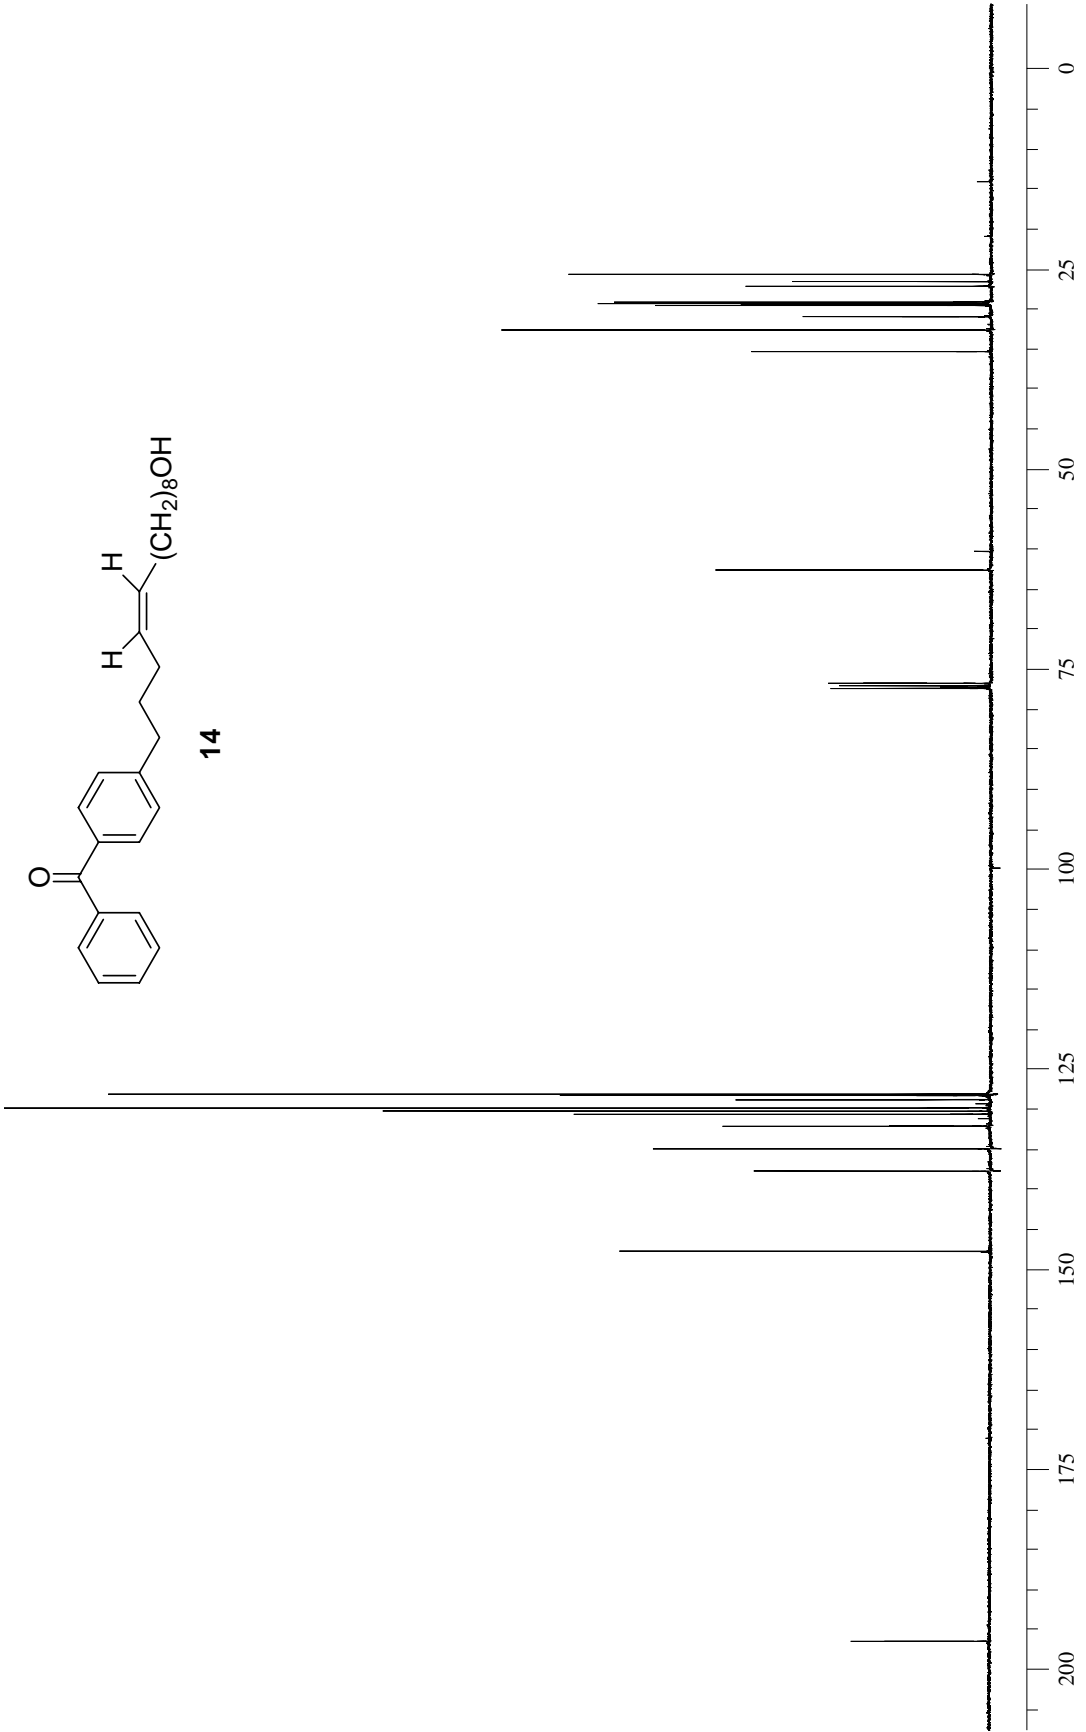

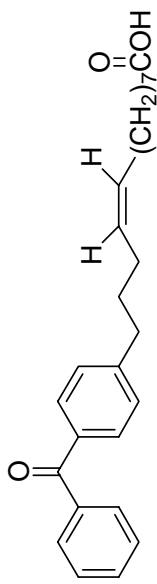

15

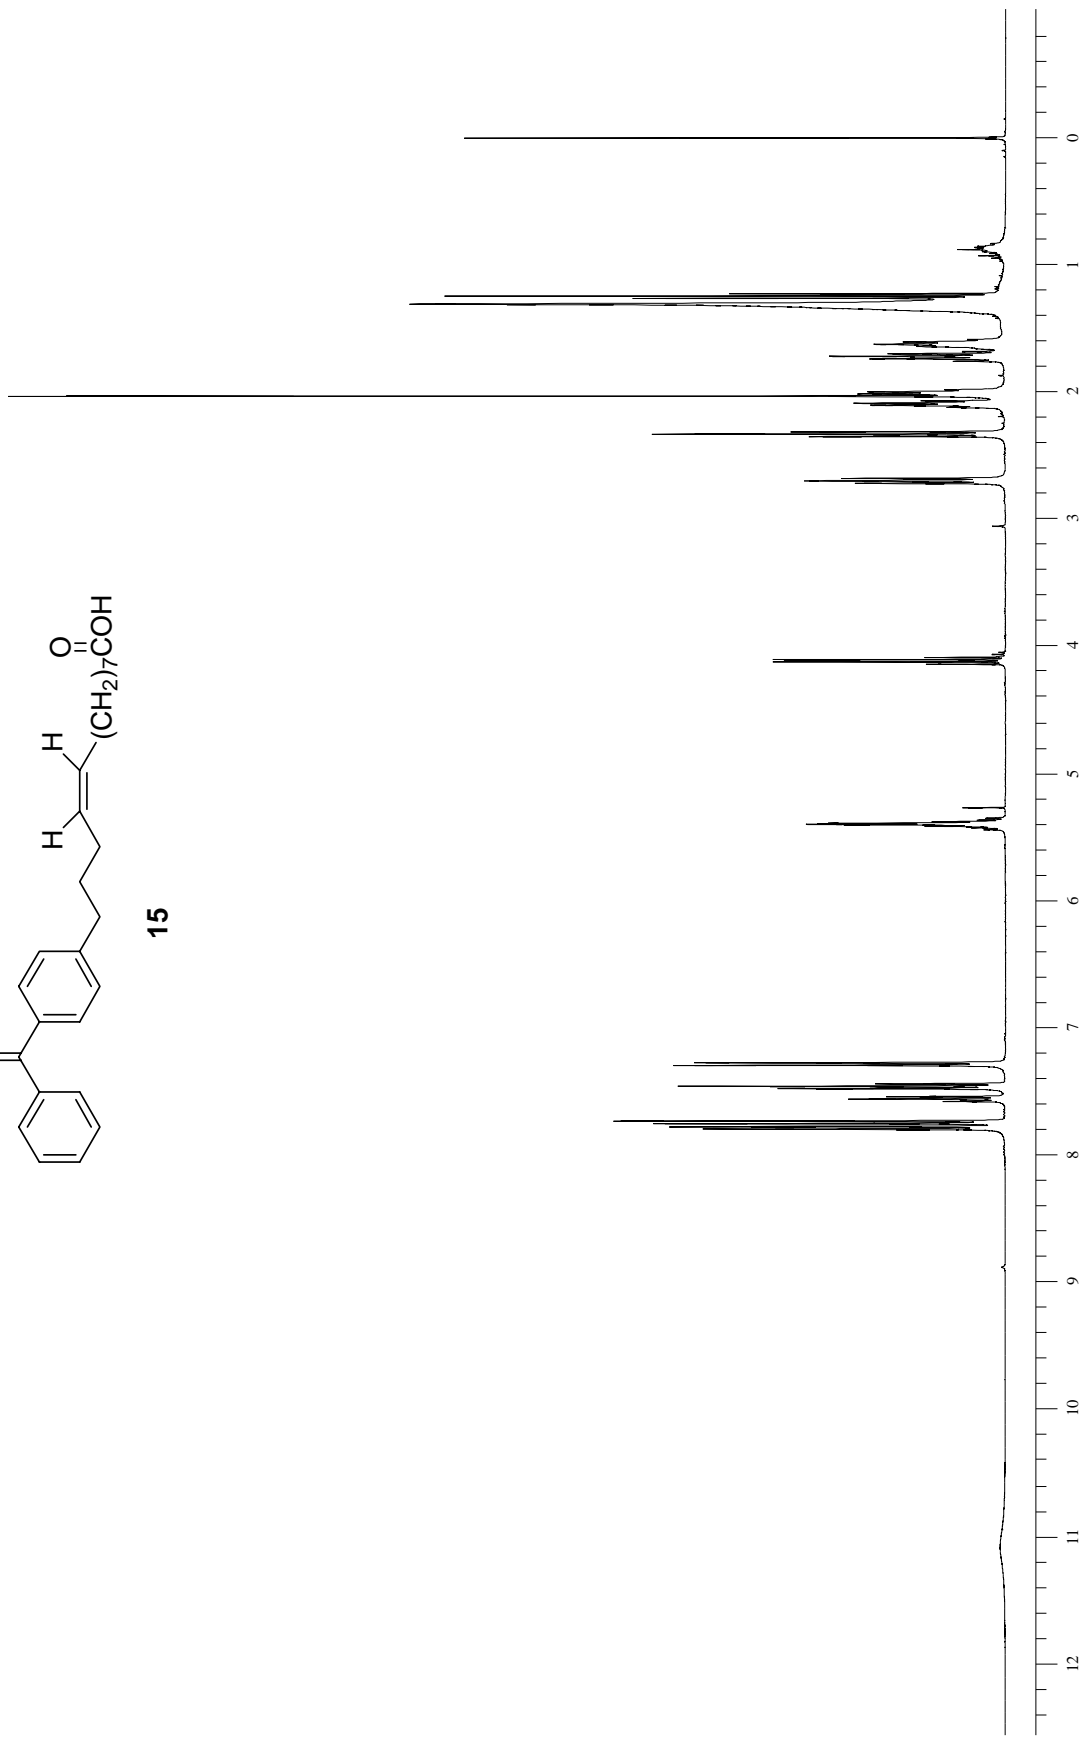

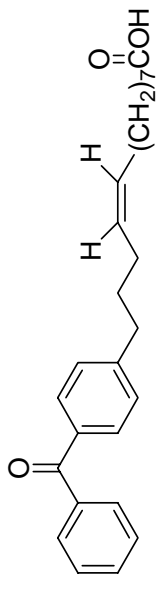

15

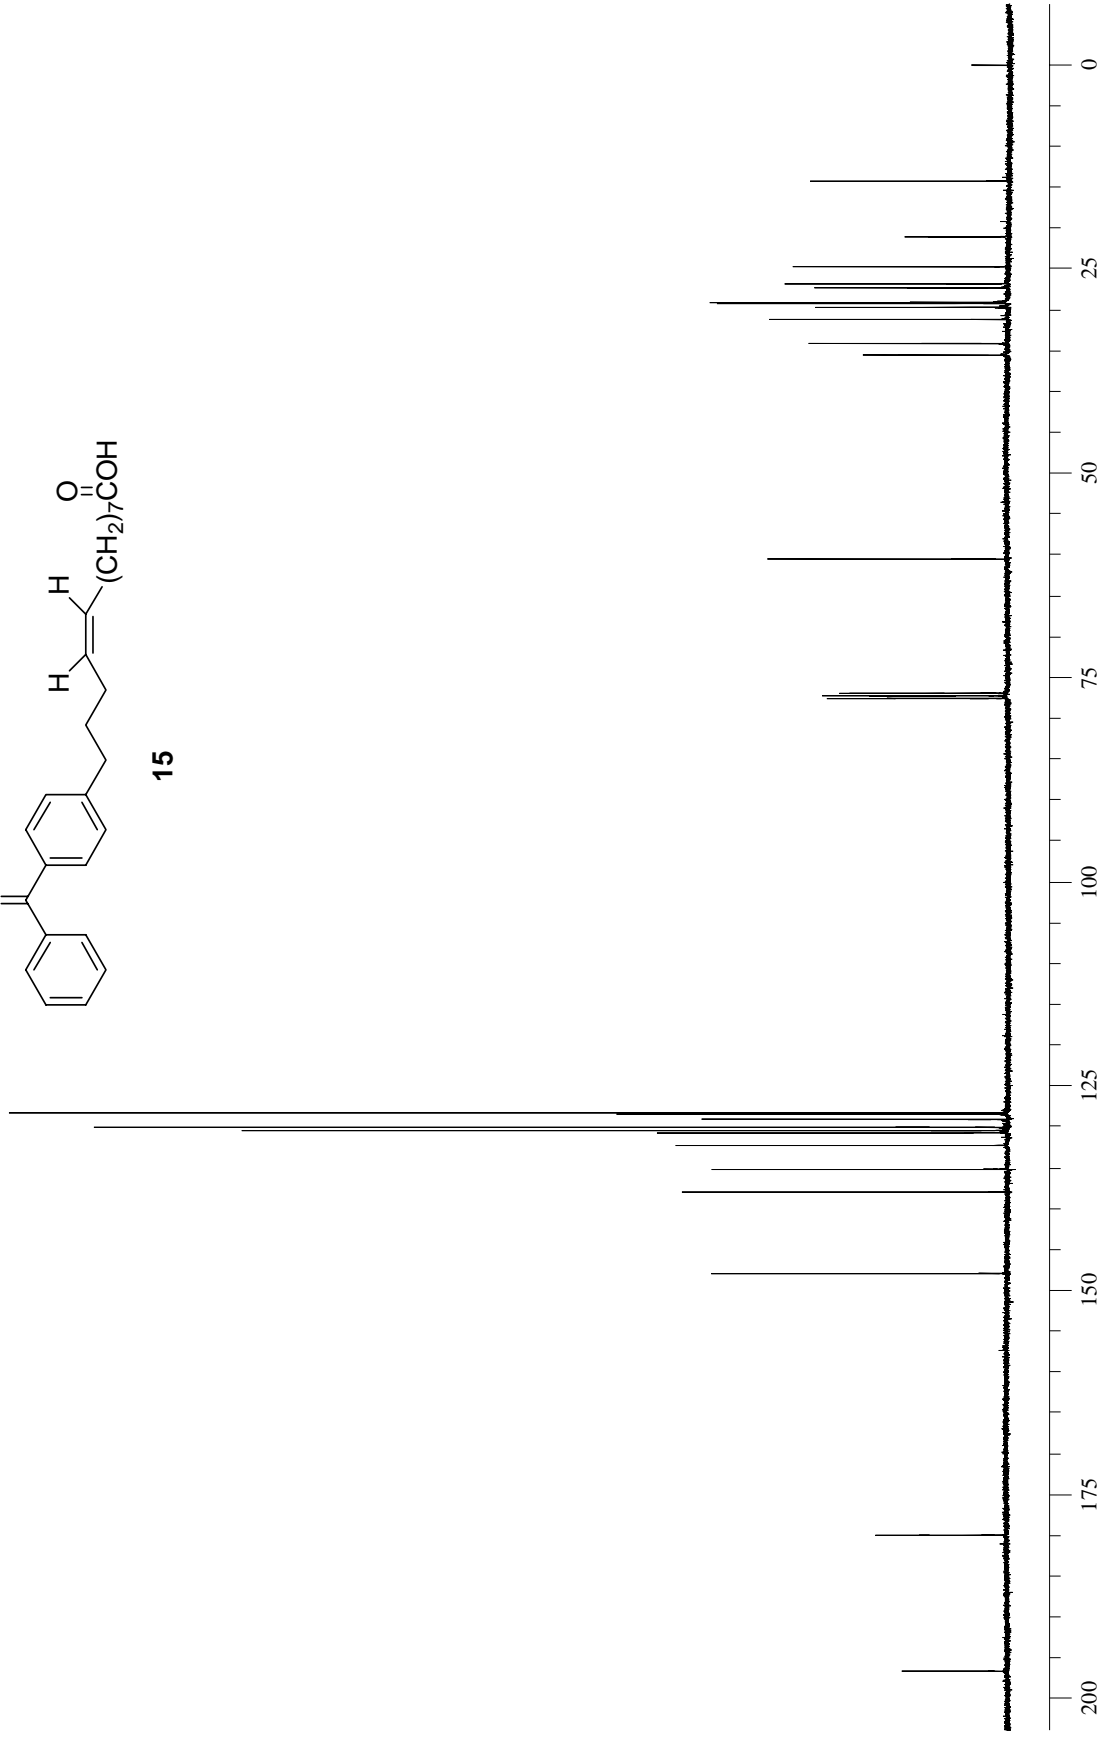

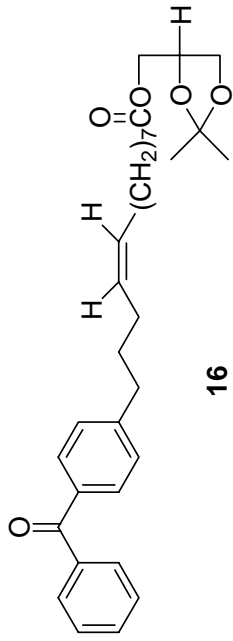

16

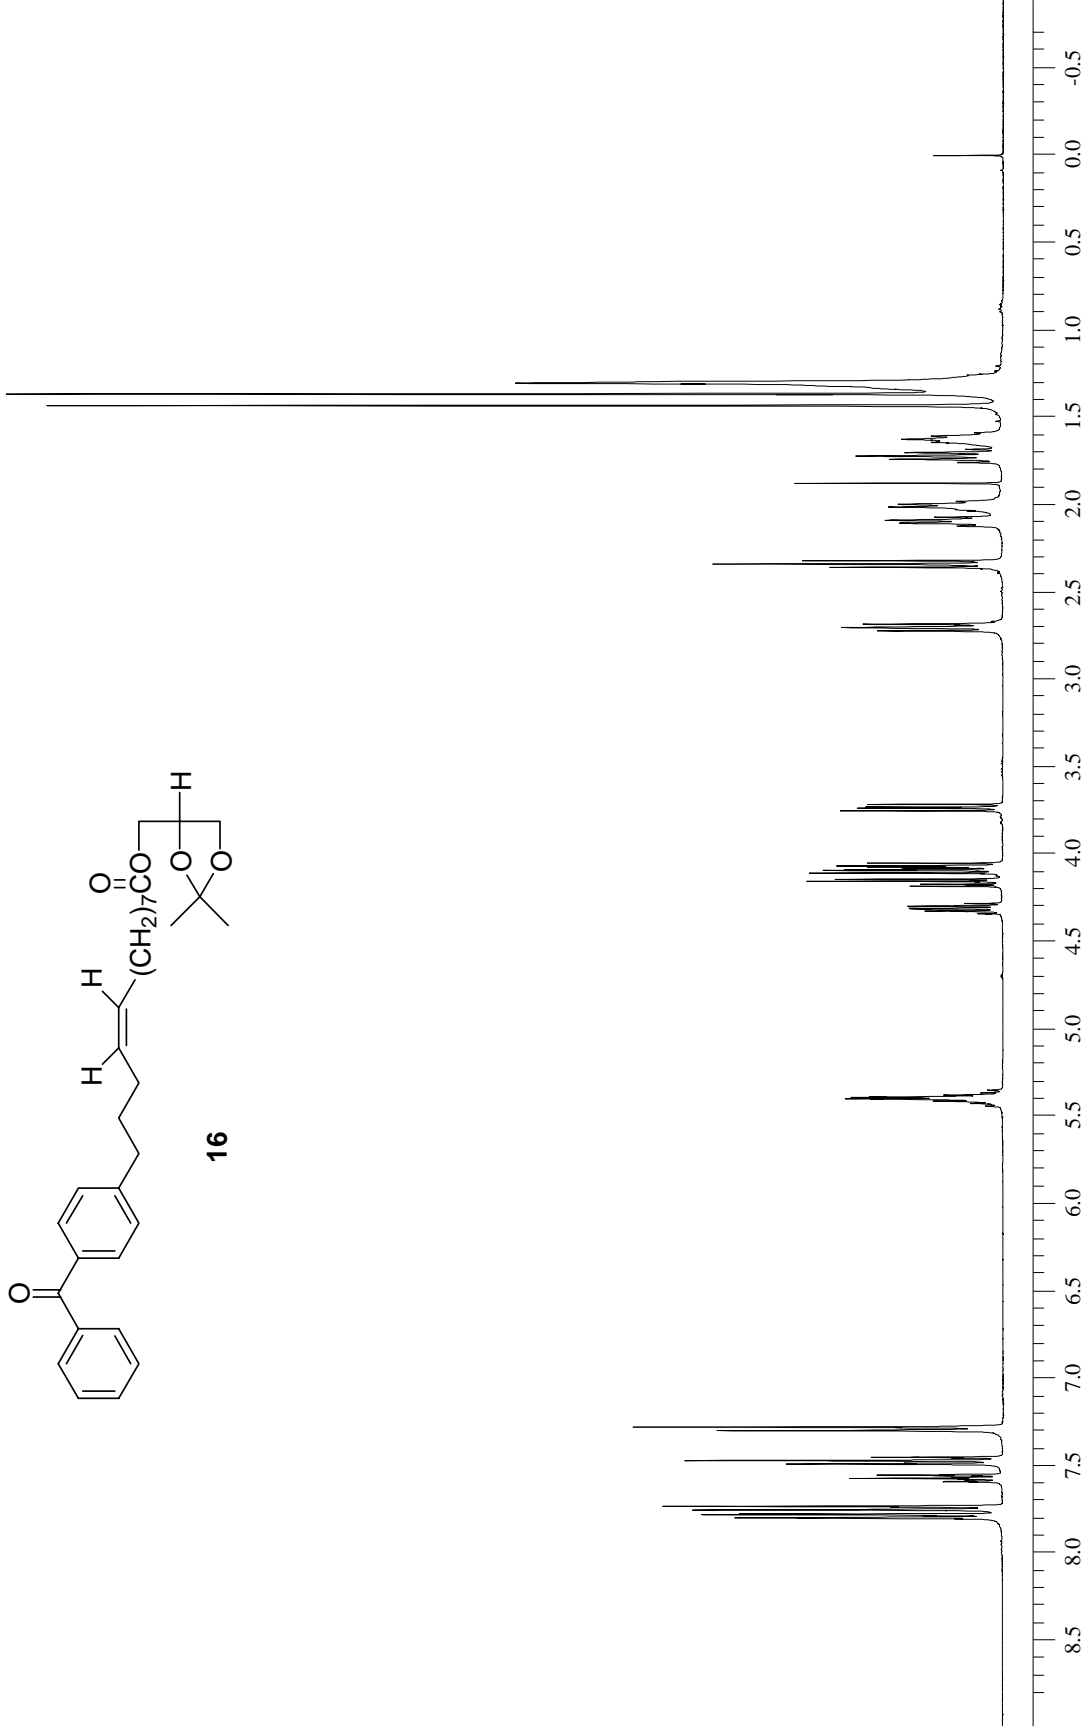



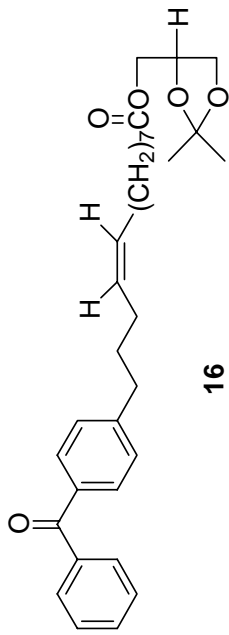

16

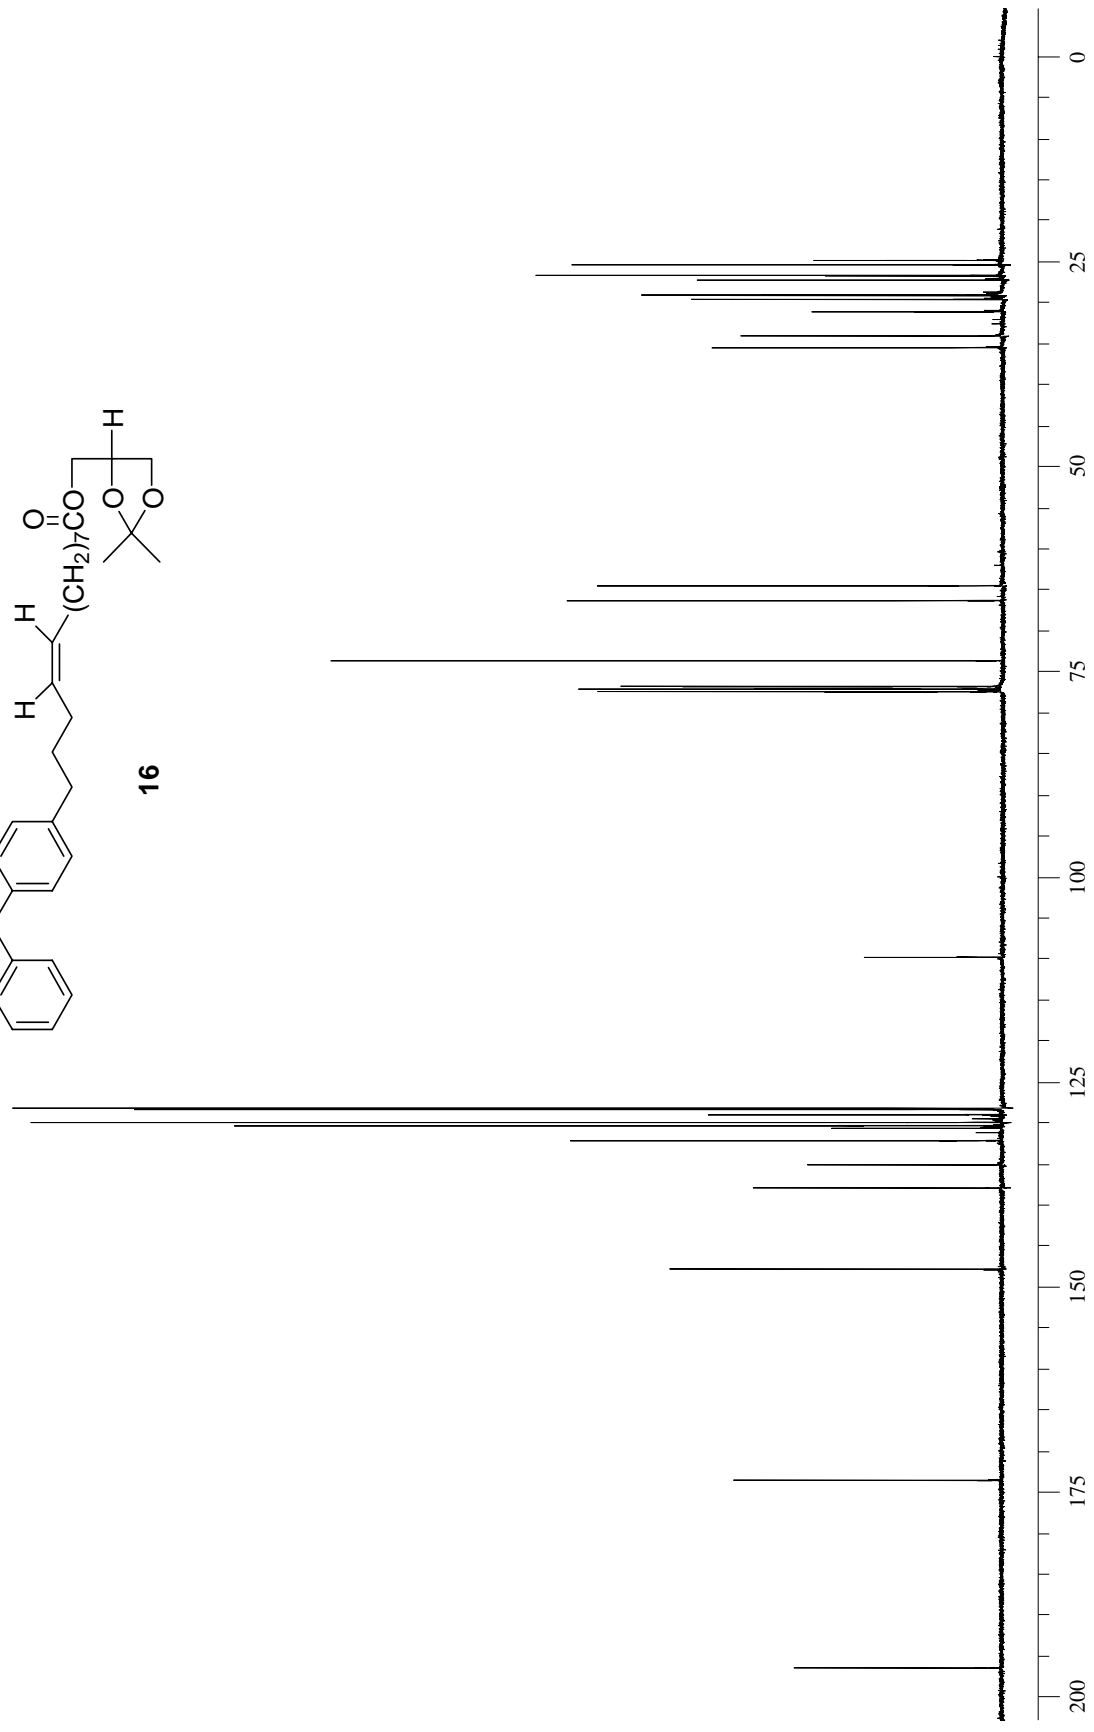

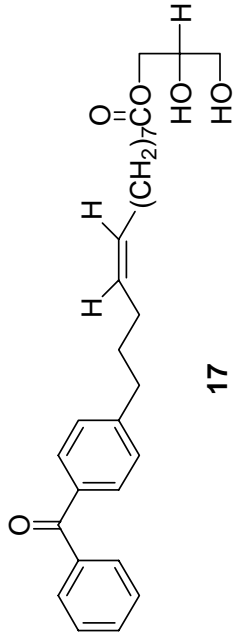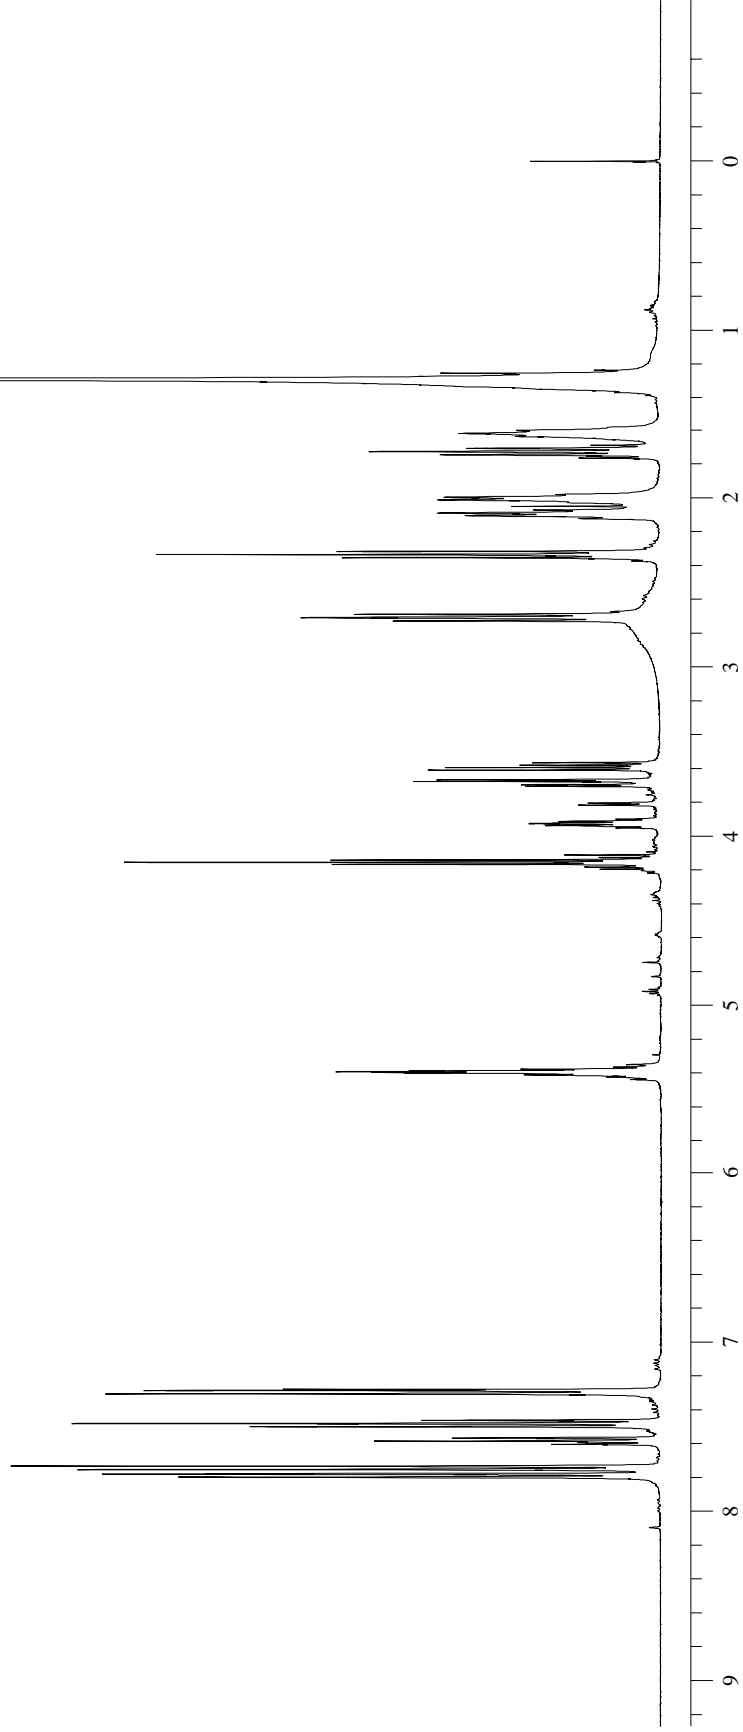

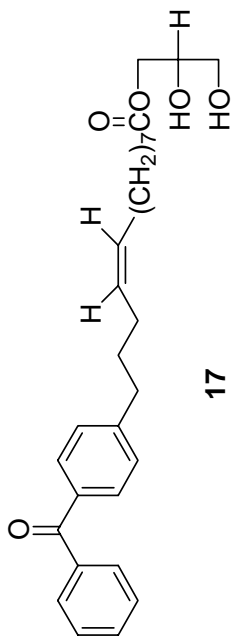

17

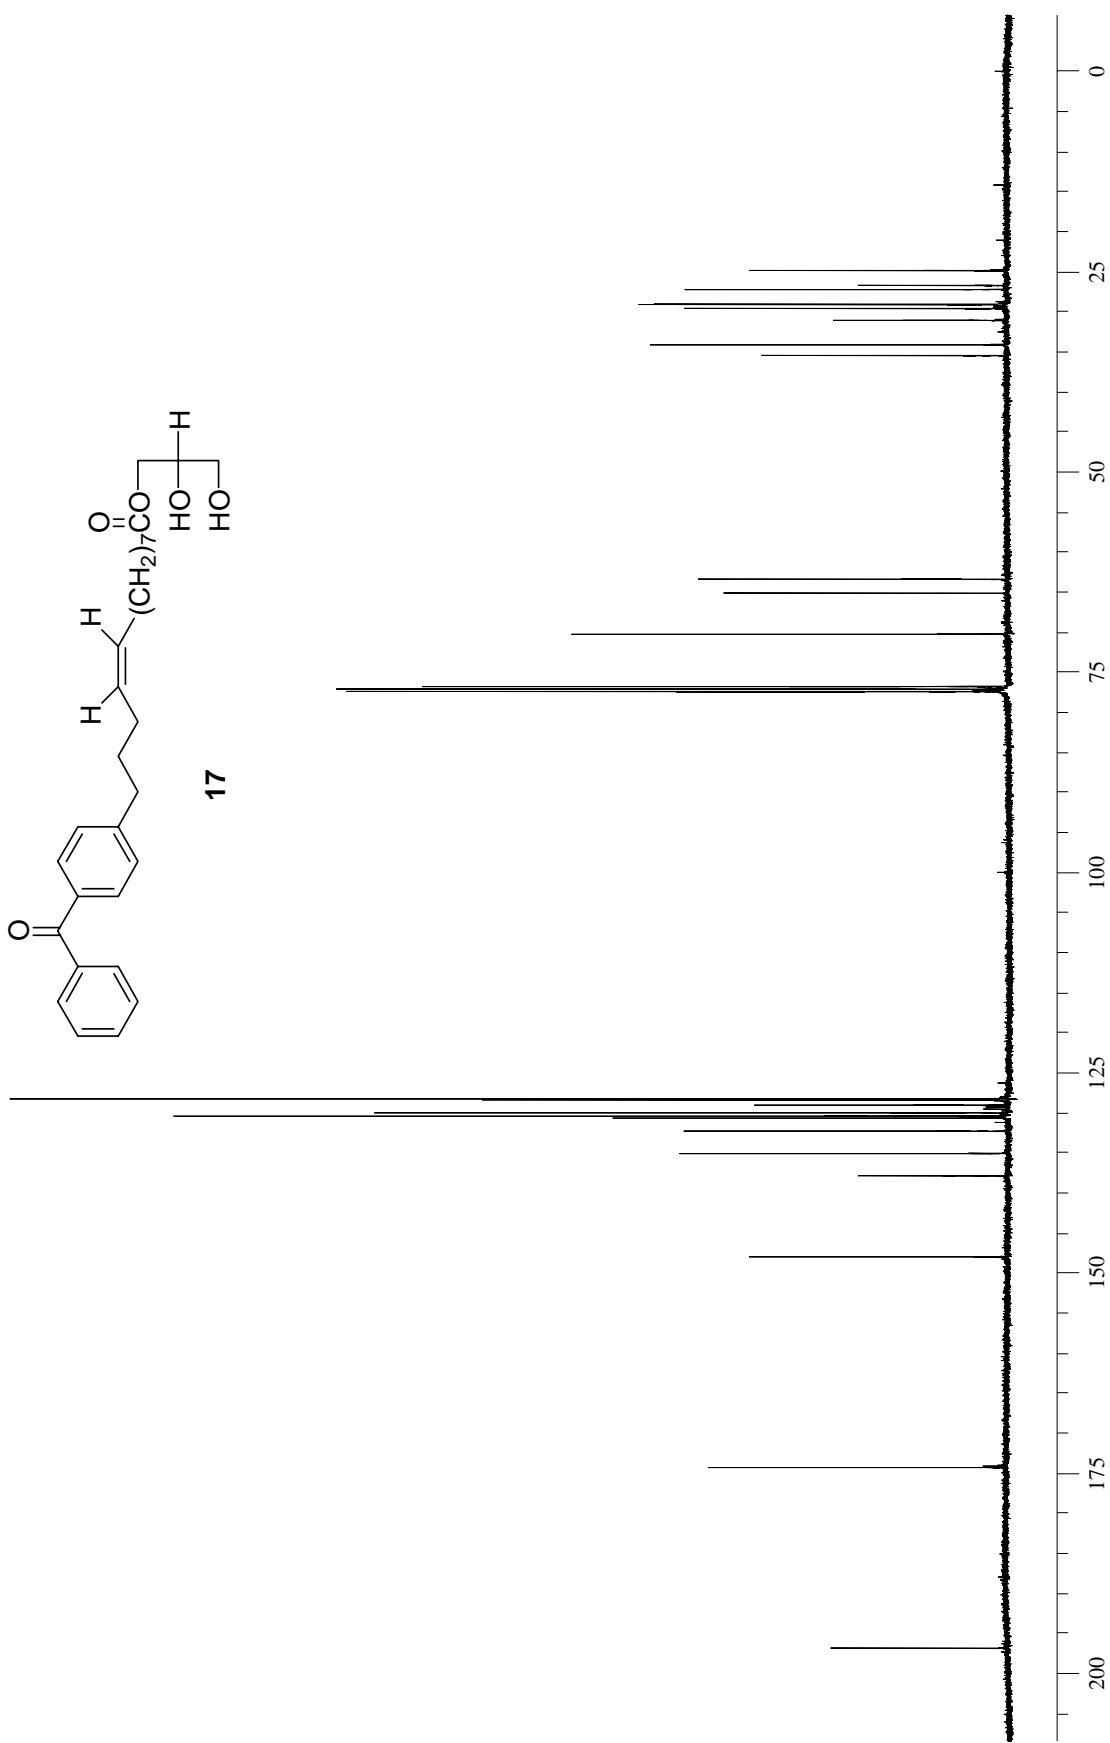

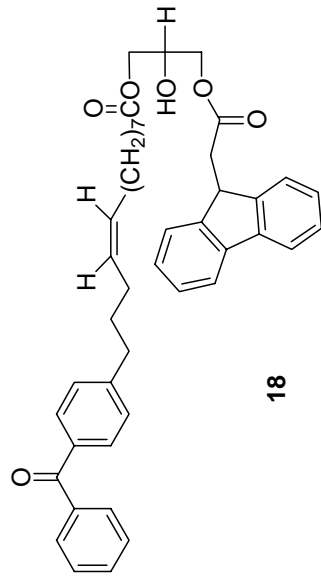

18

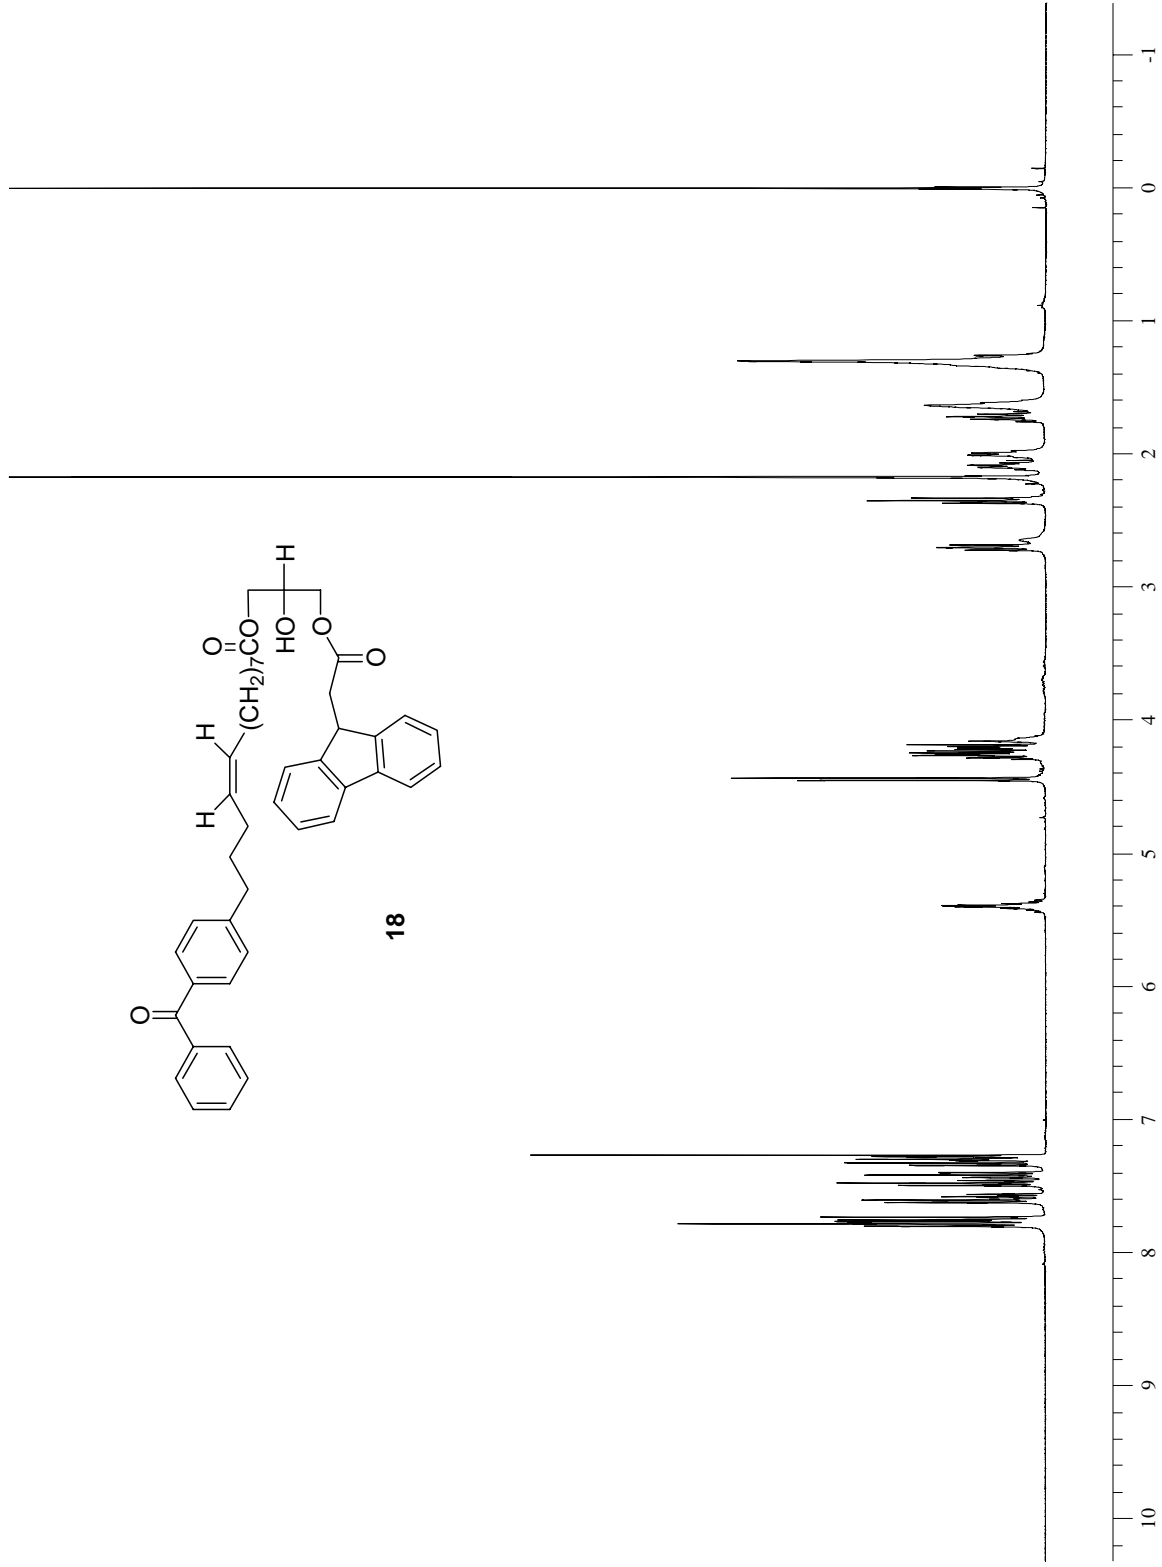

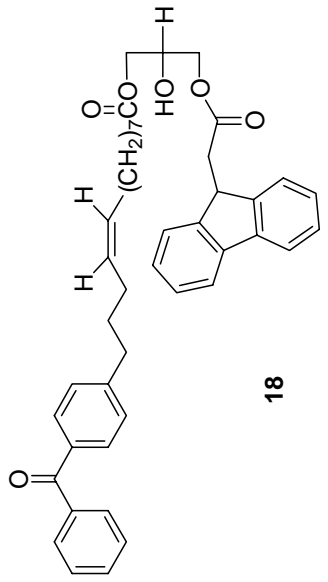

18

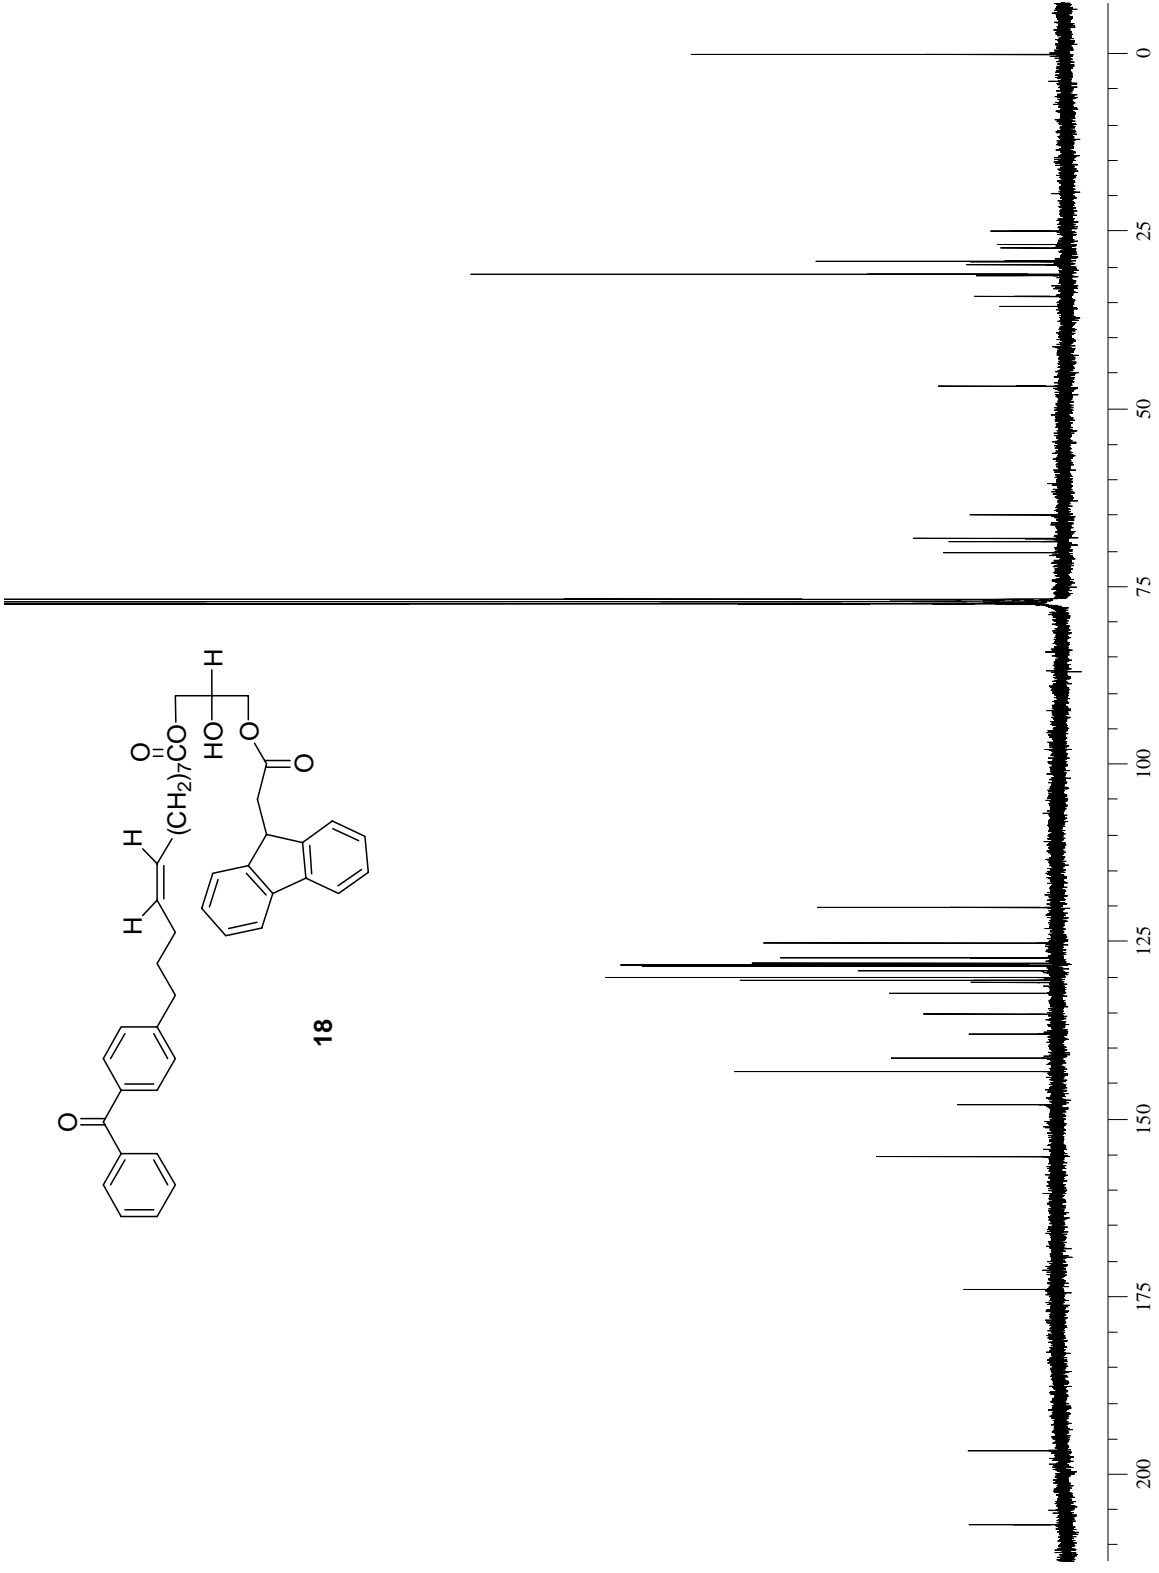

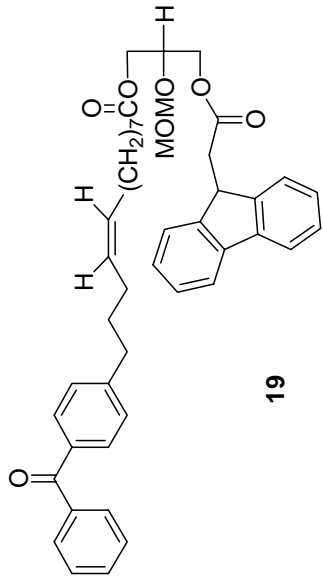

19

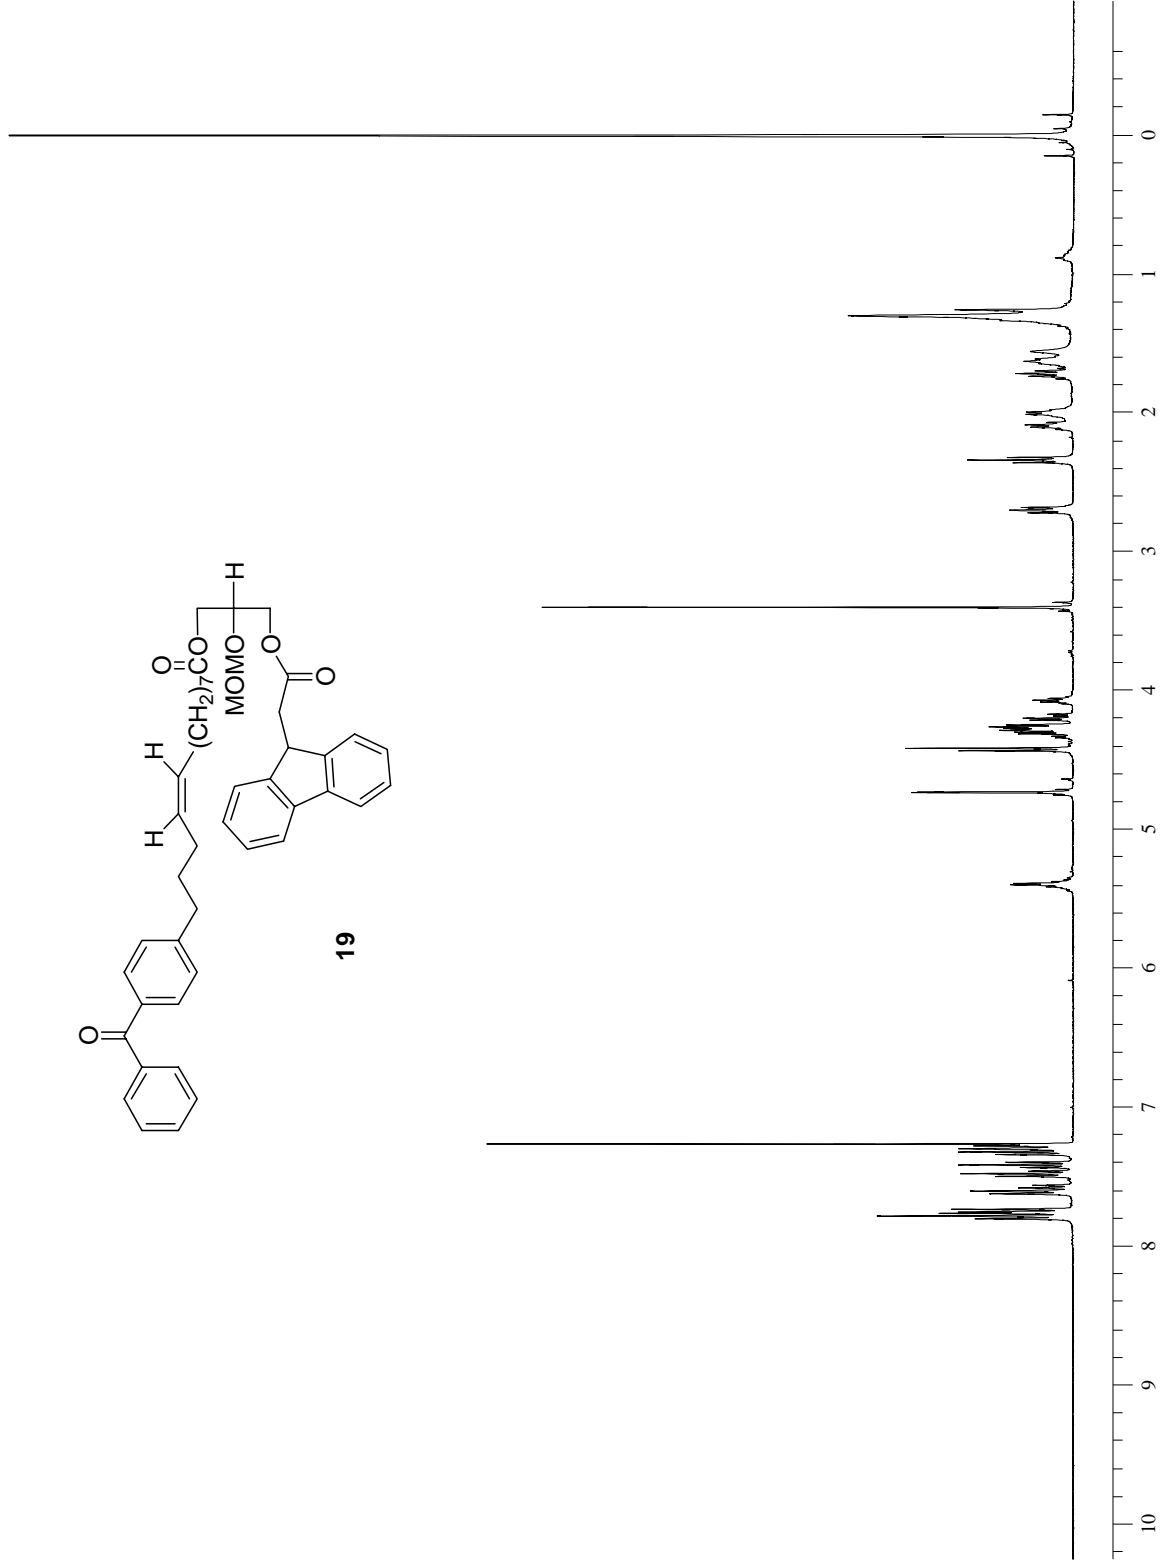

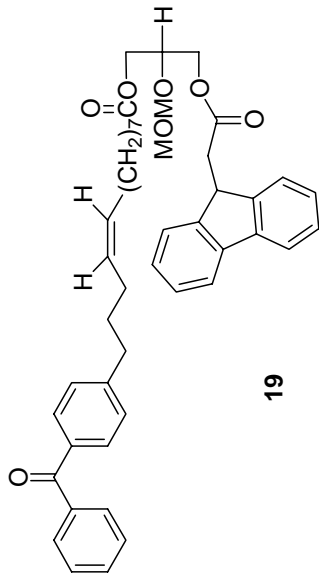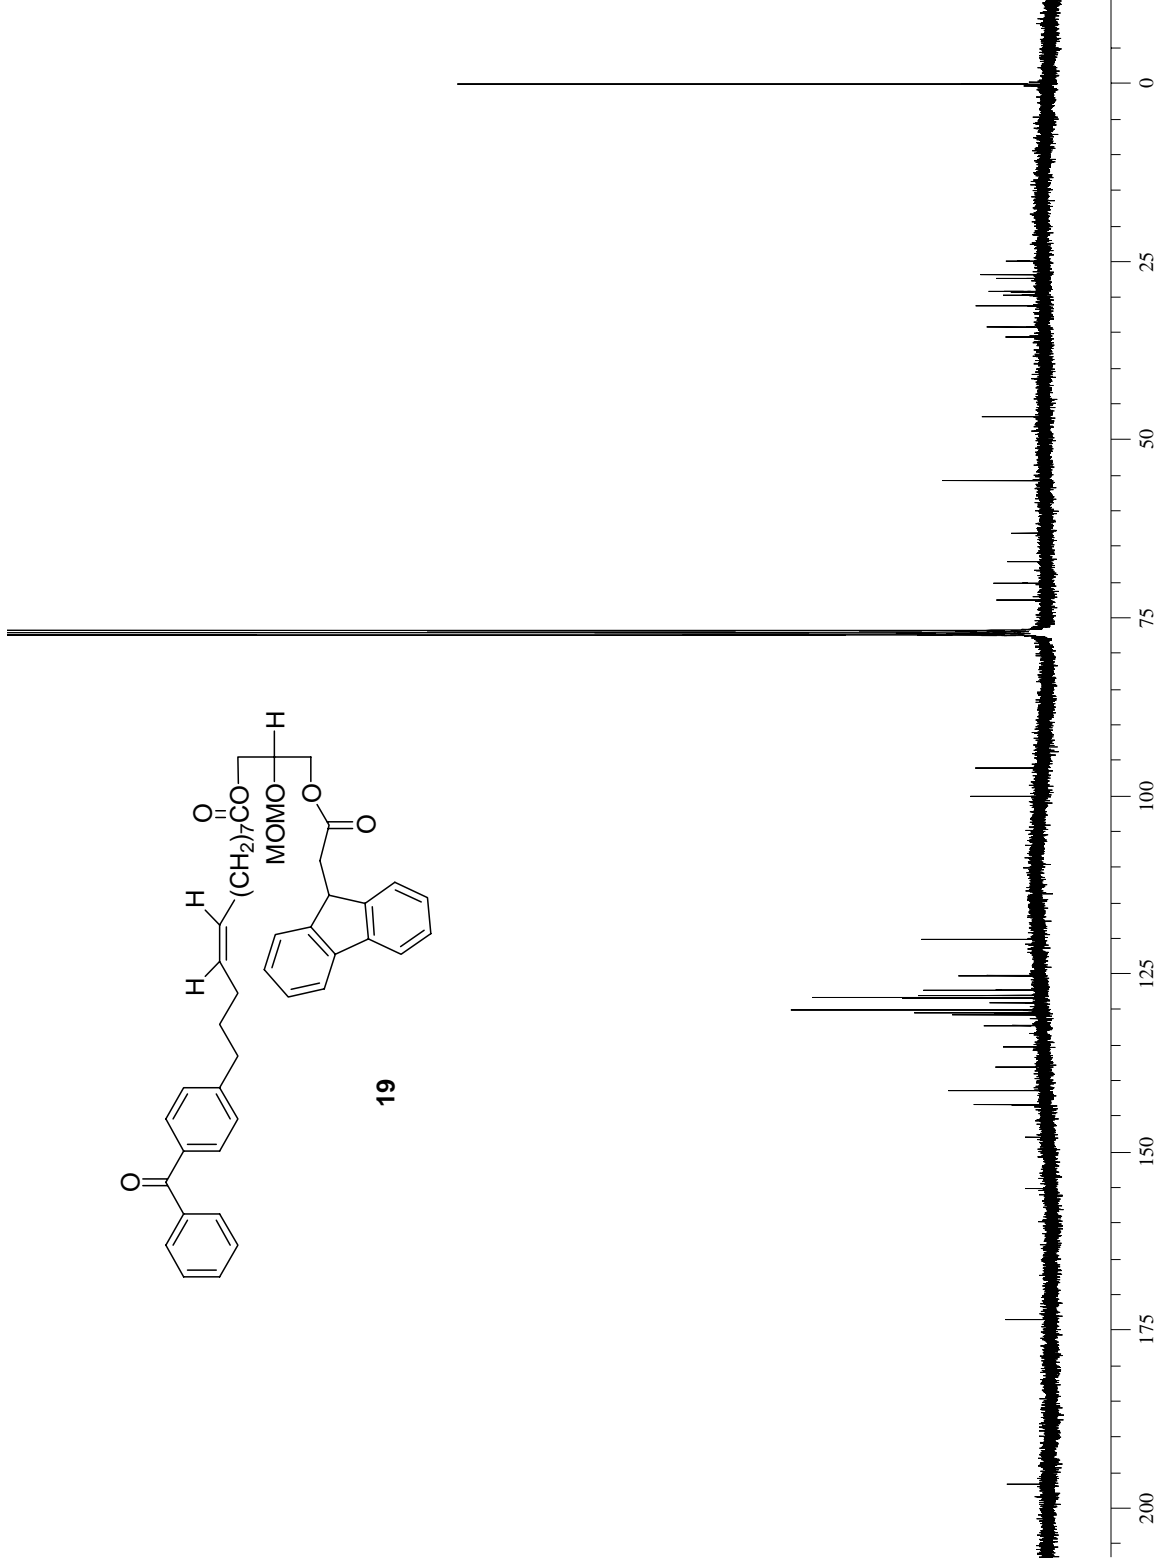

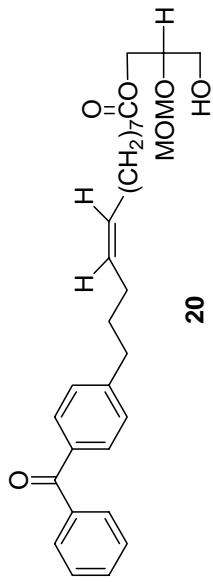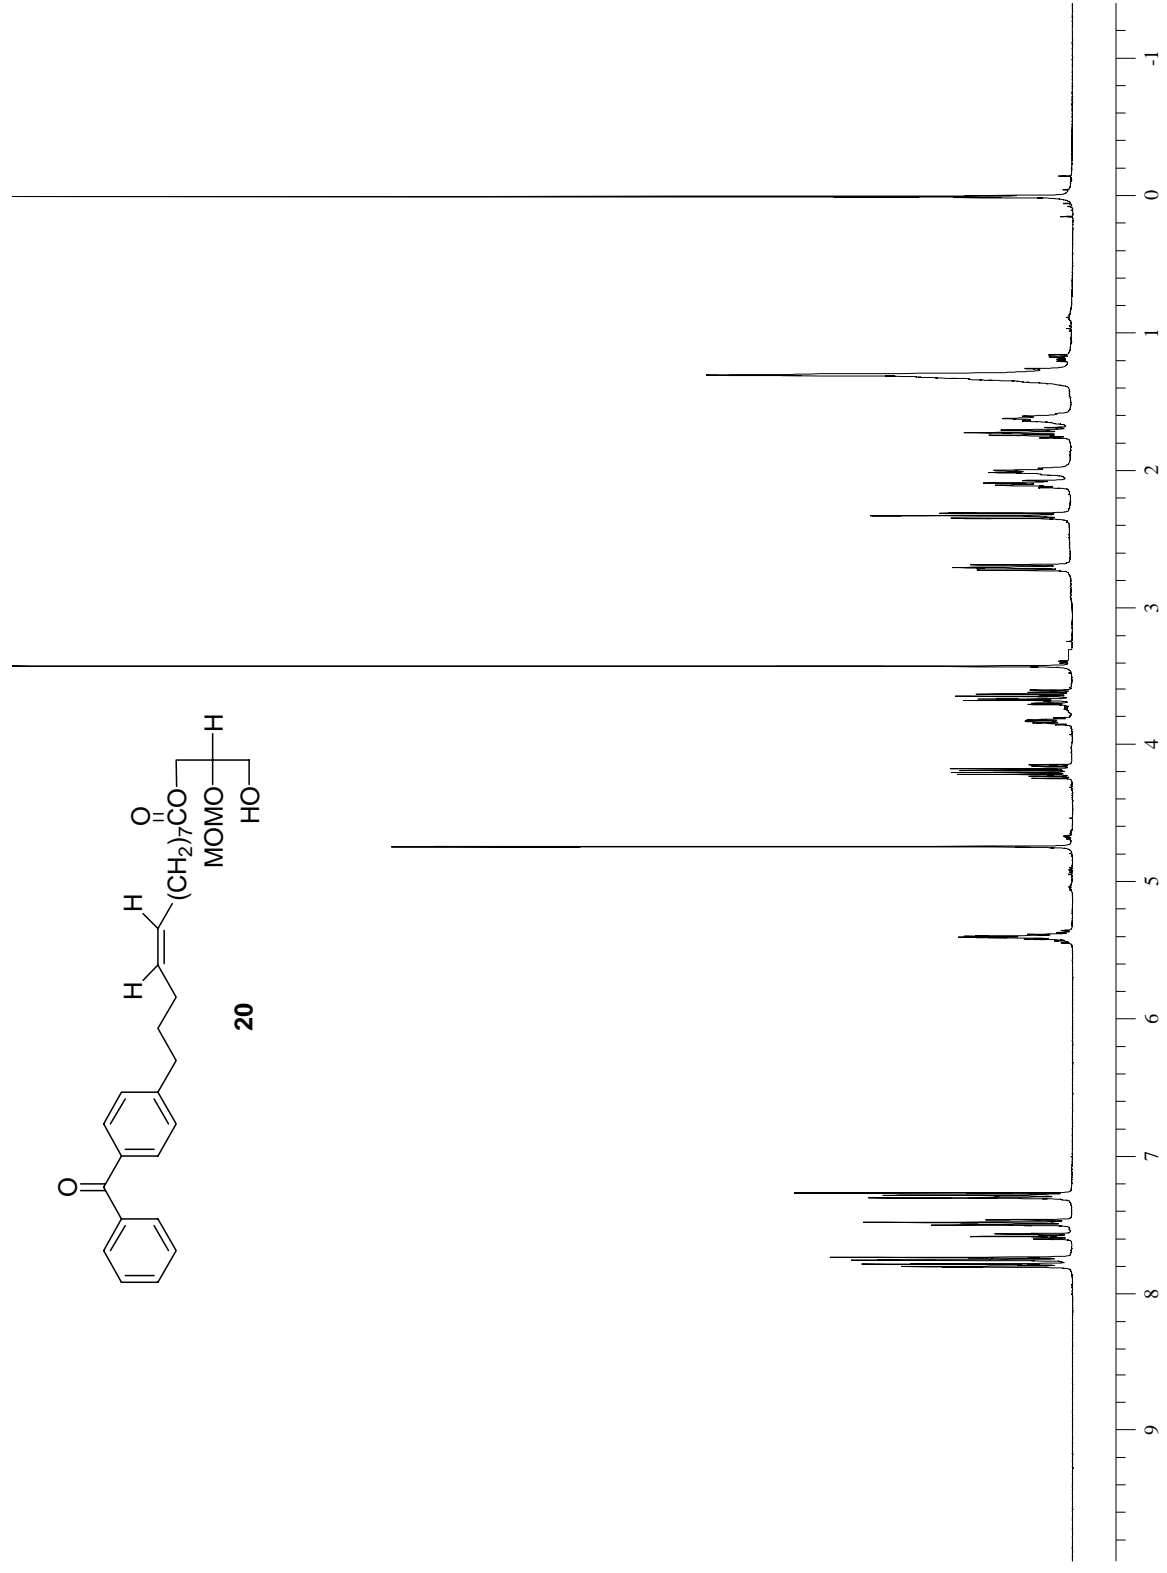



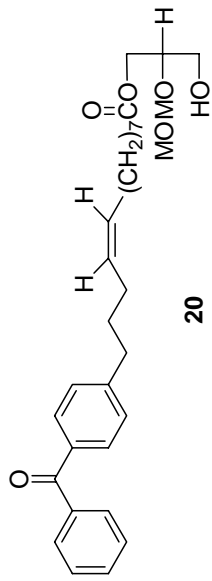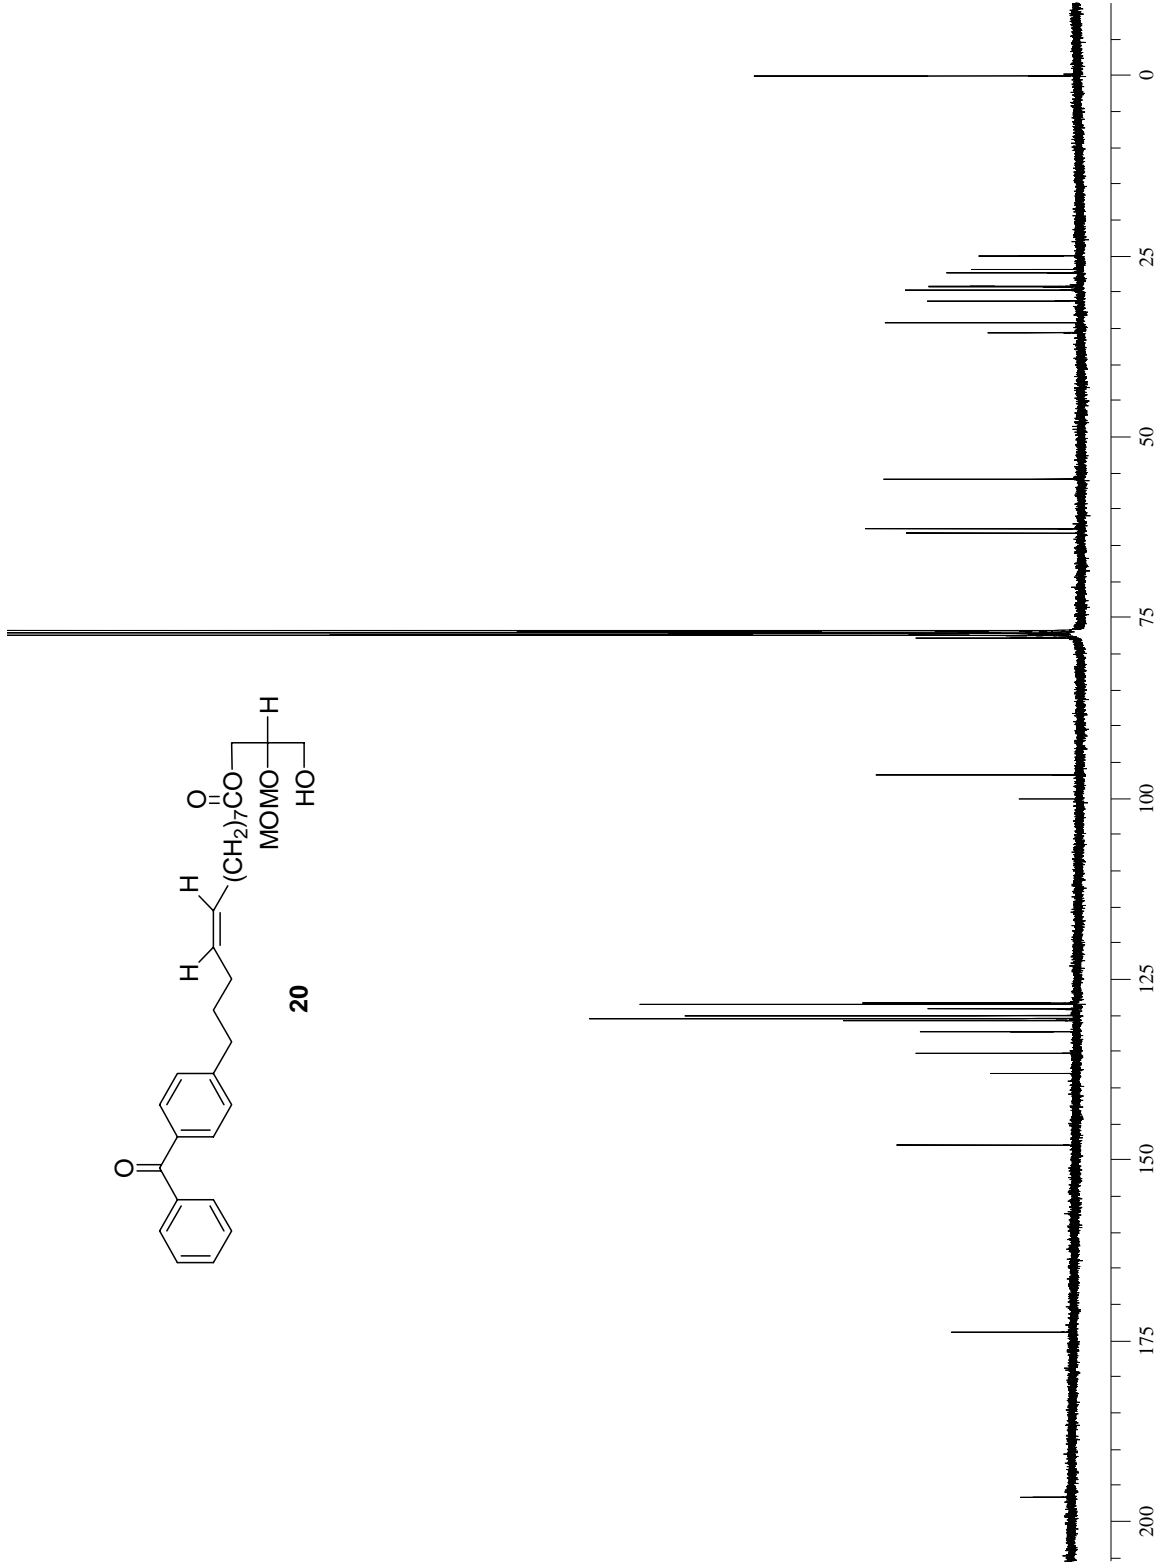

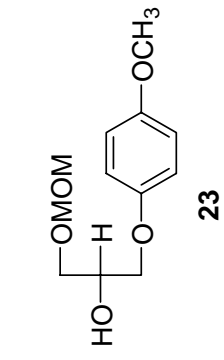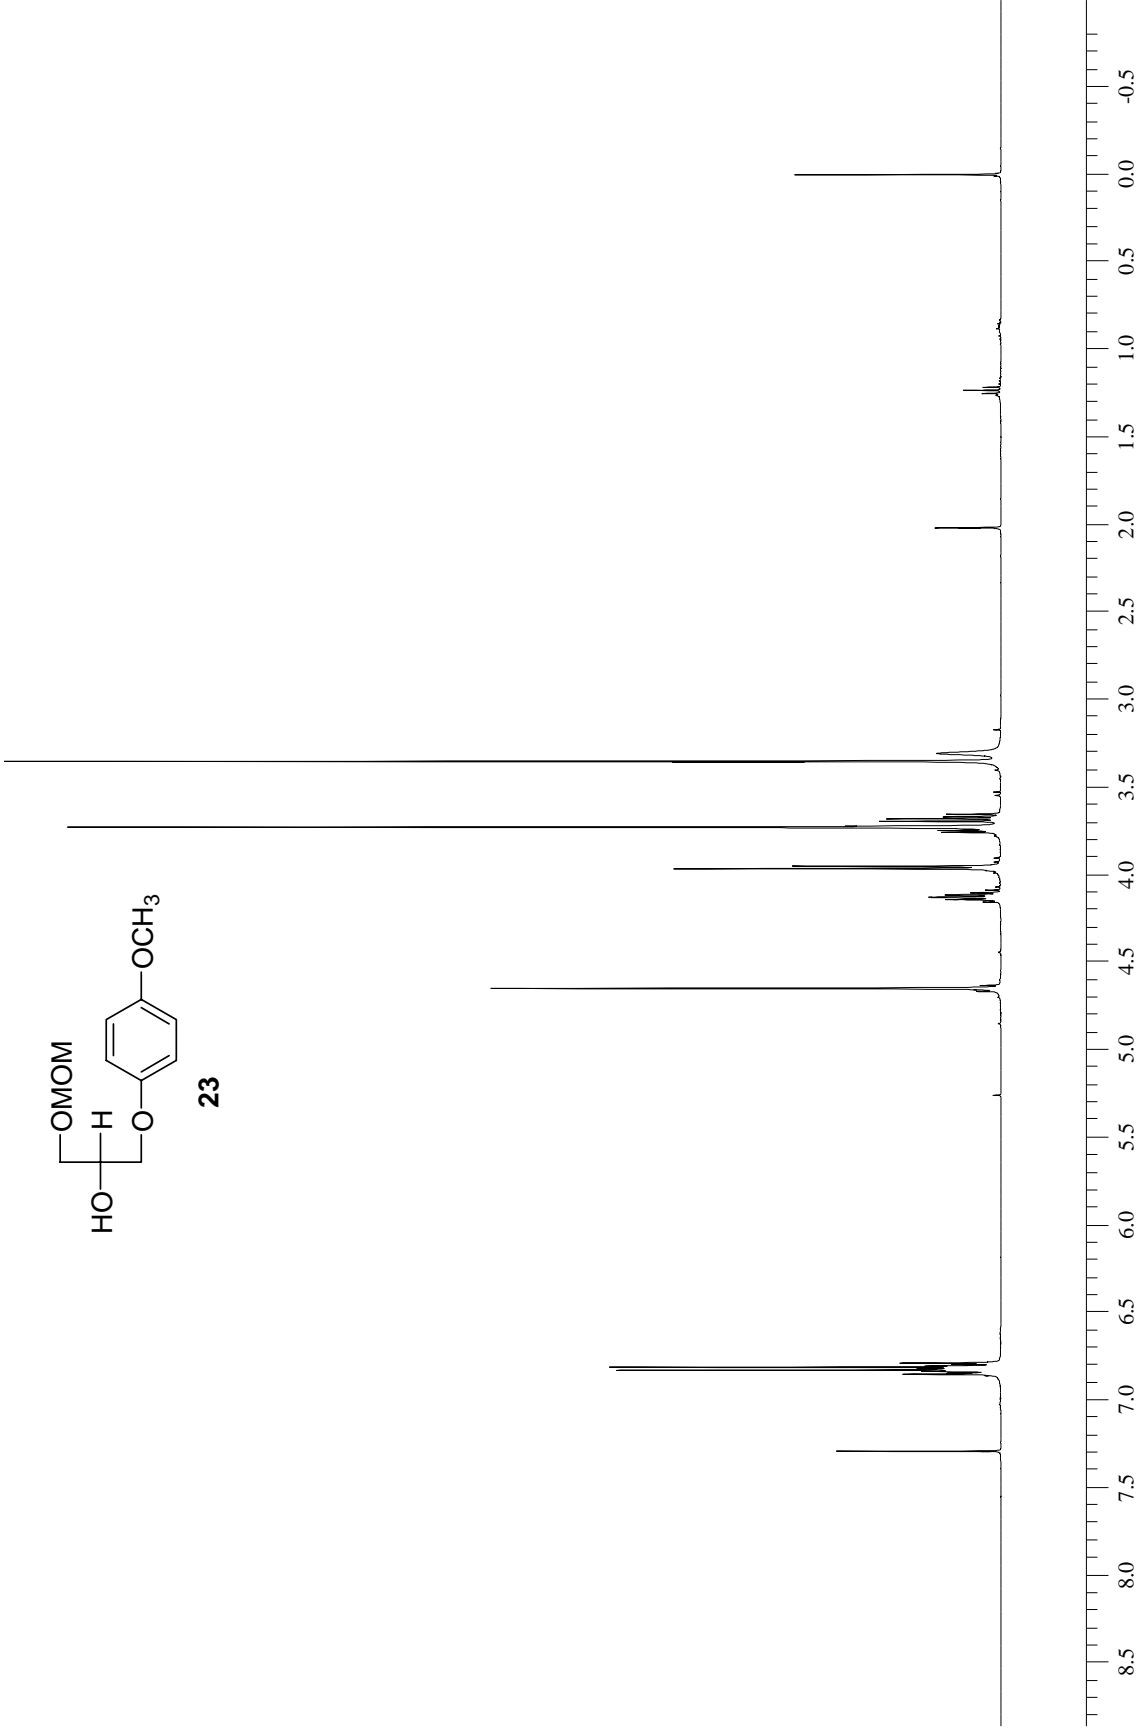

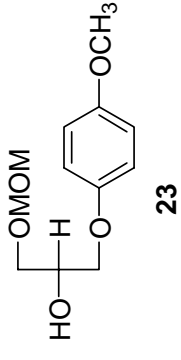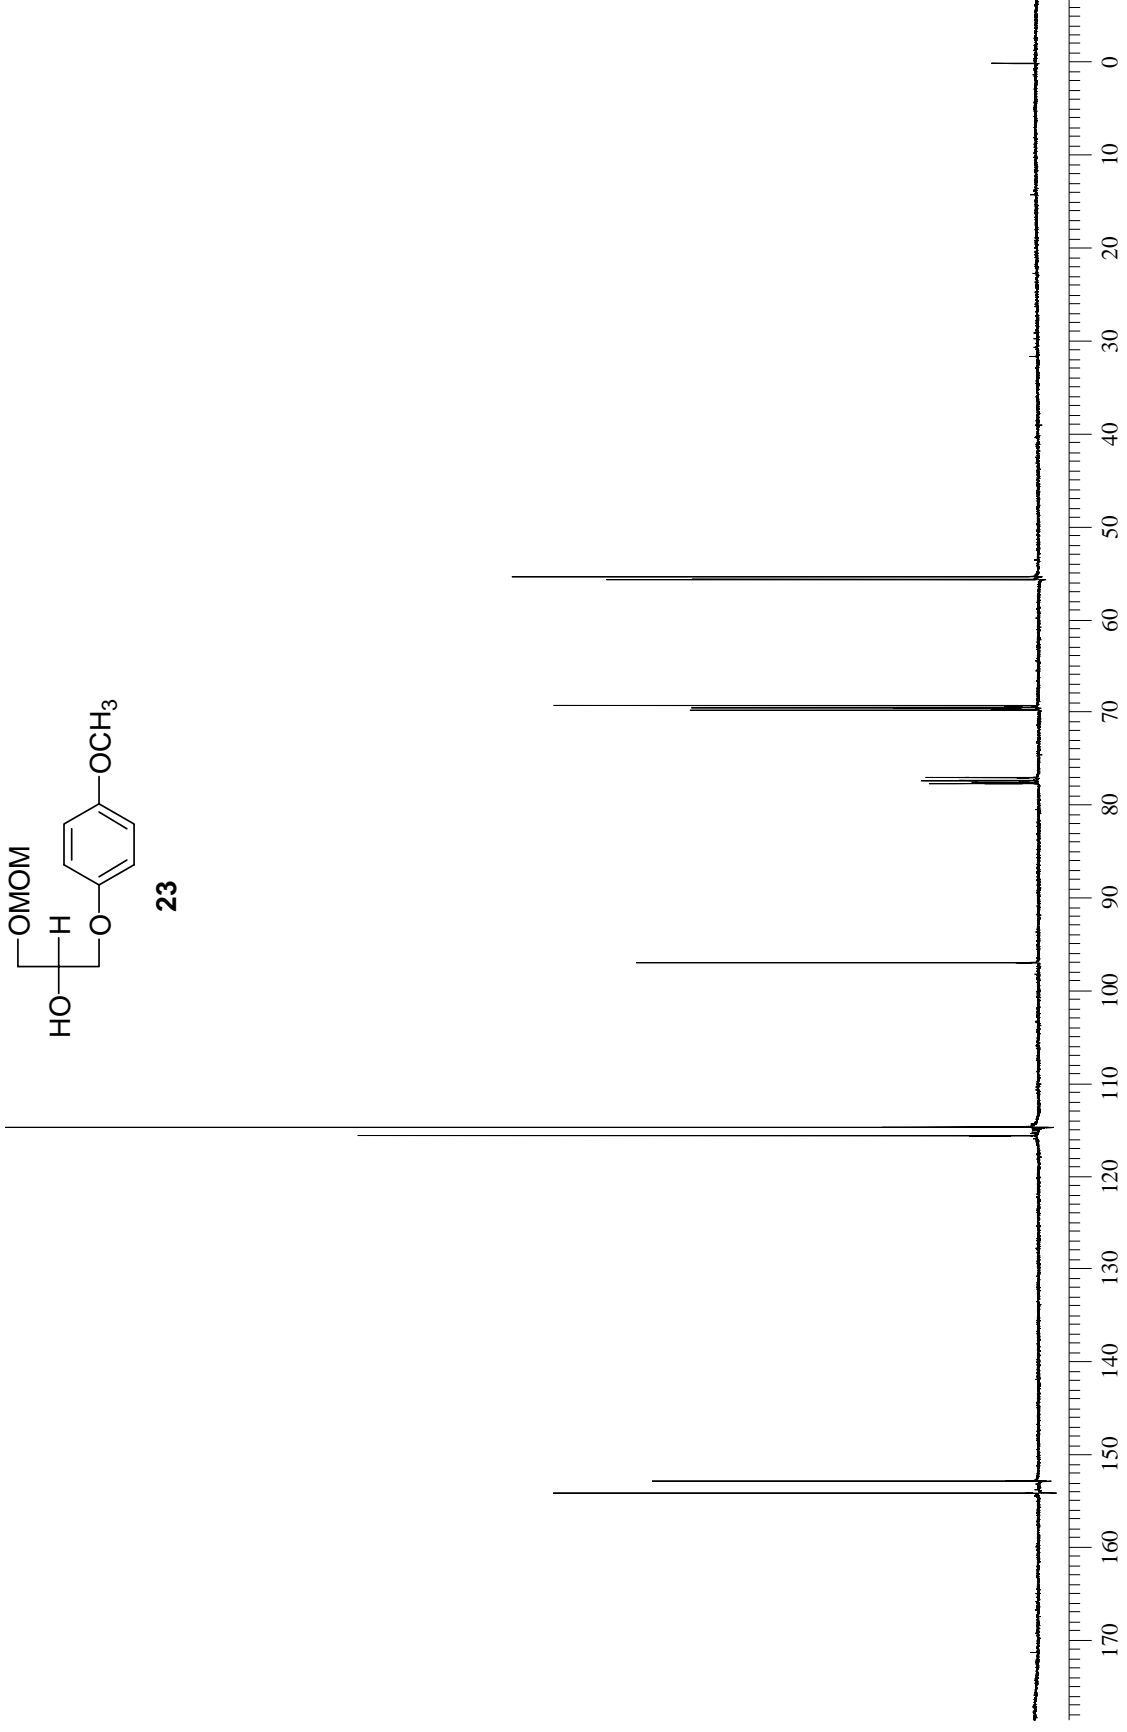

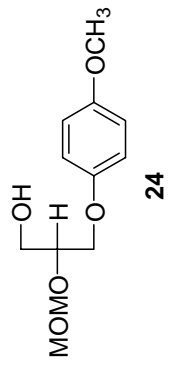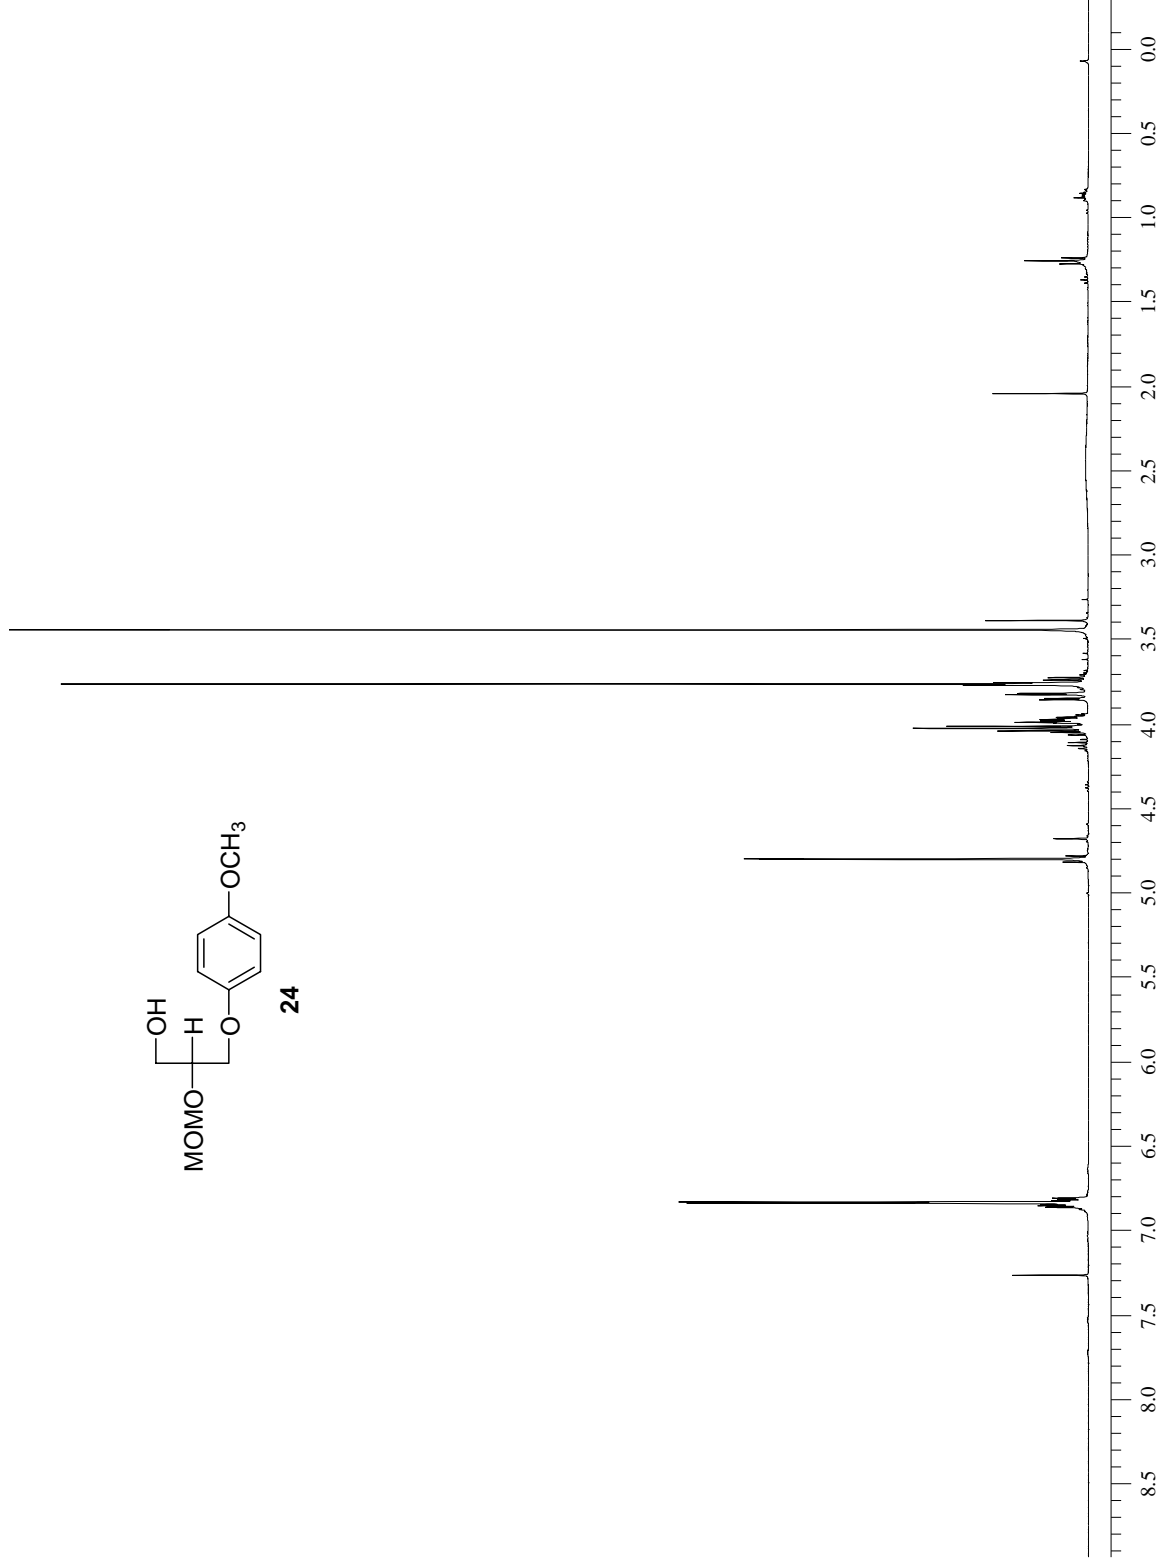

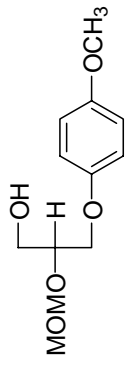

24

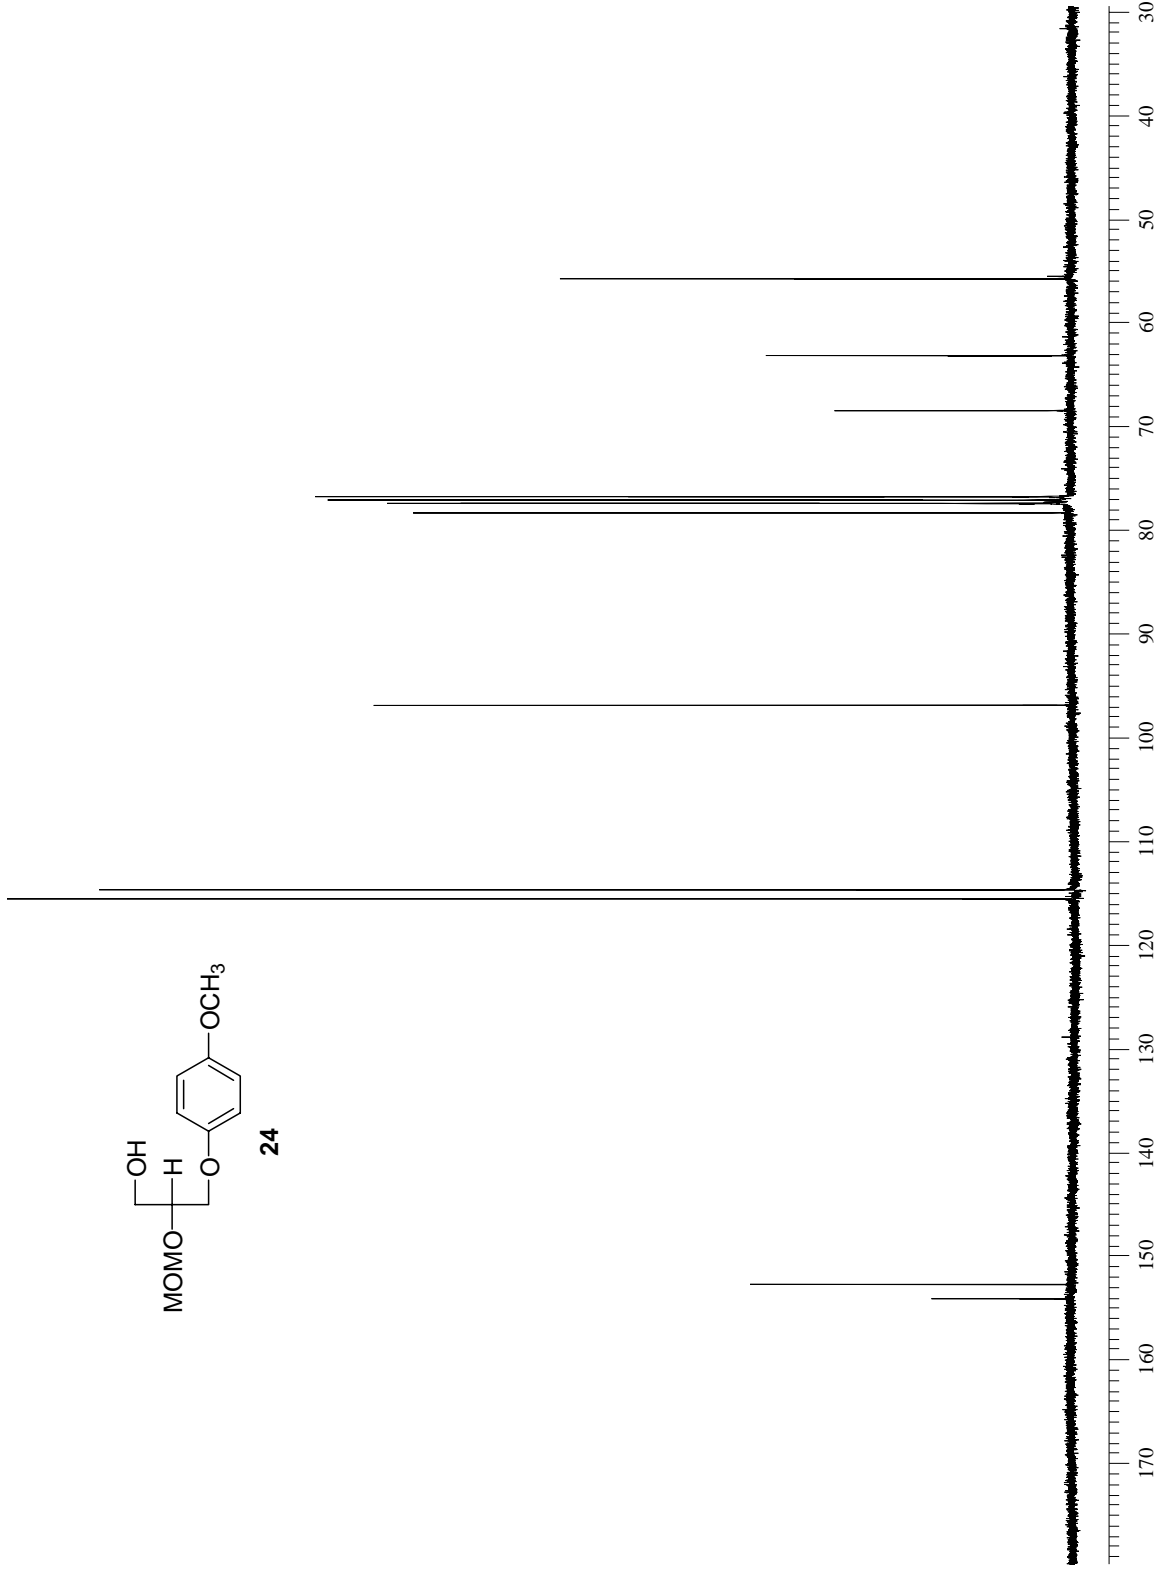

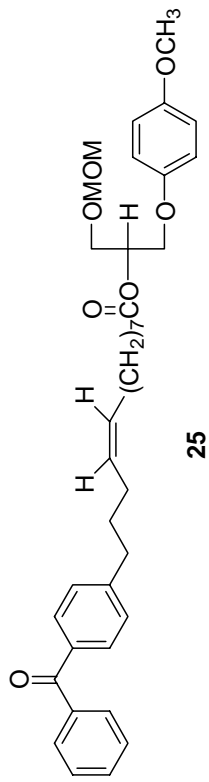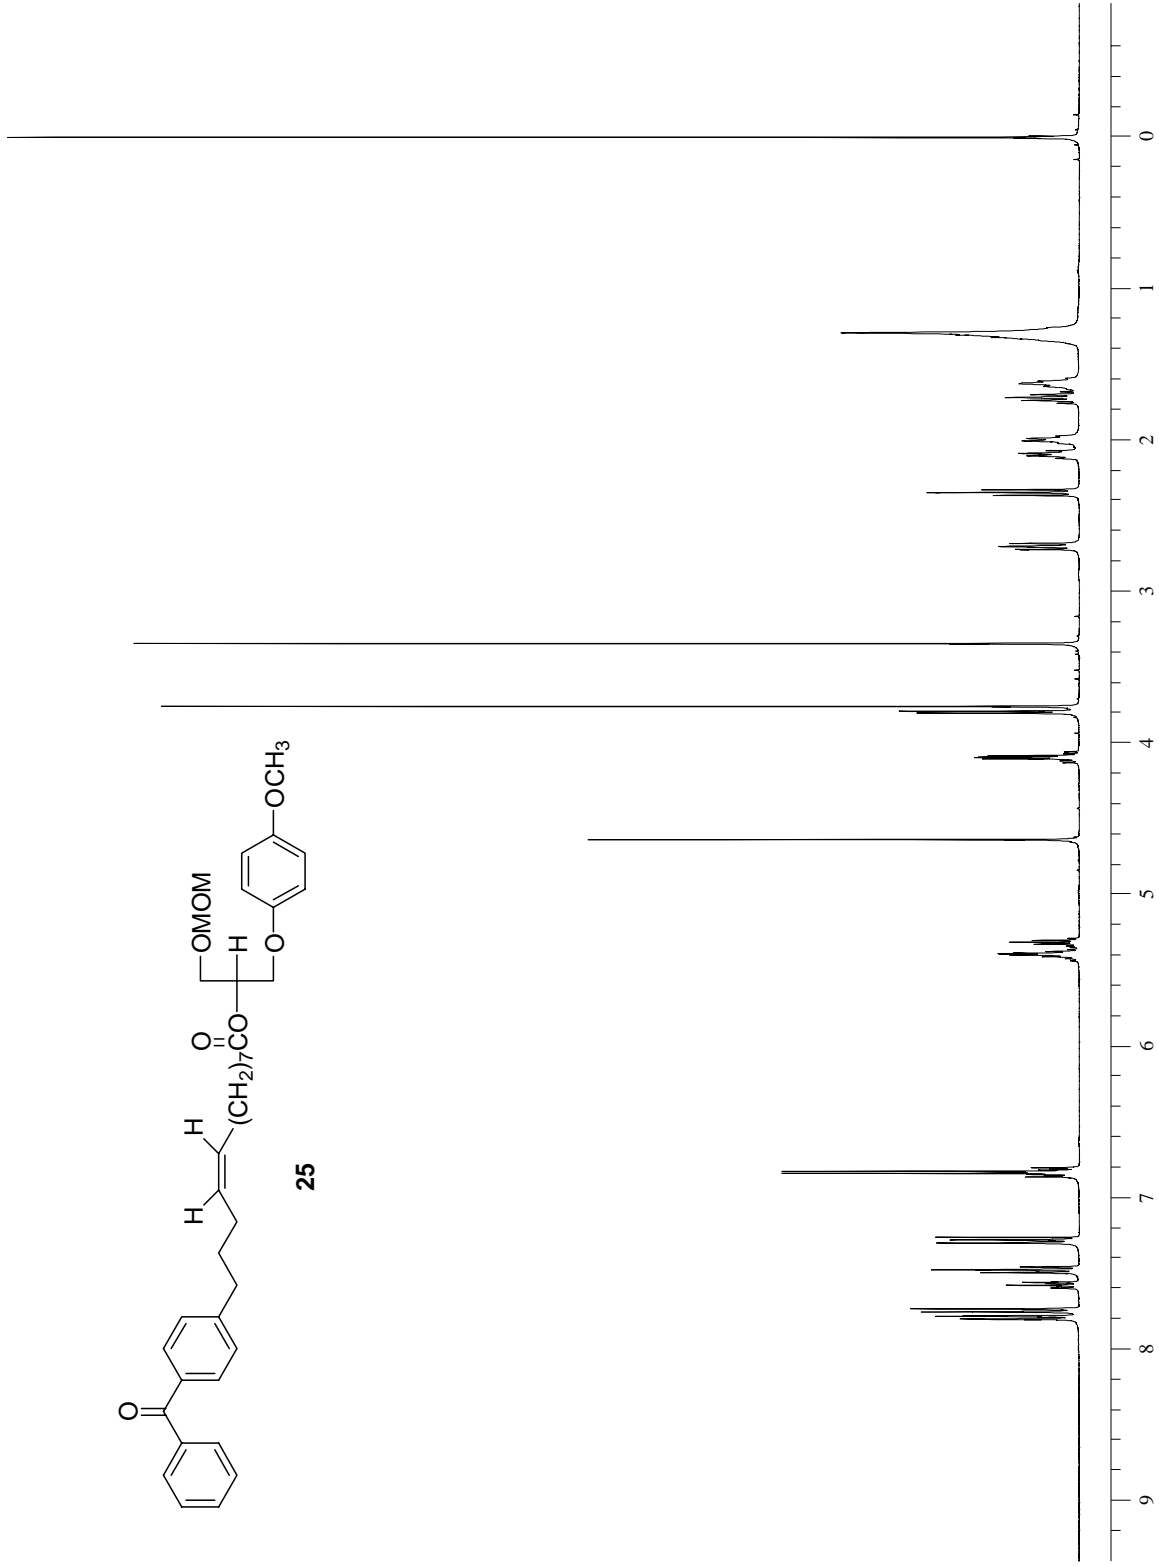

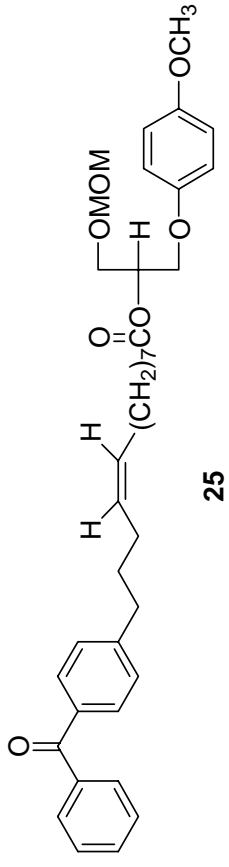

25

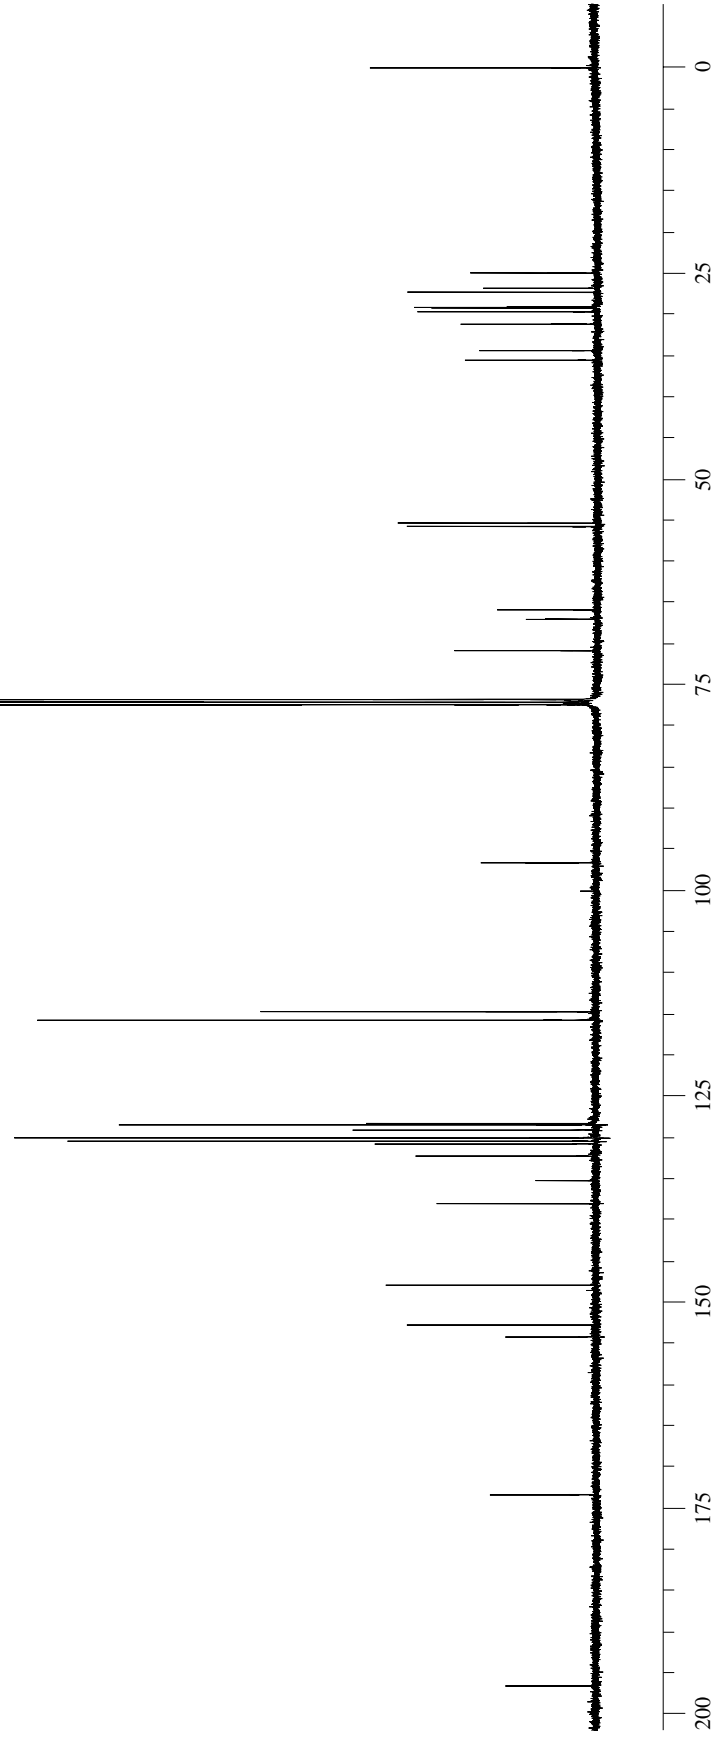

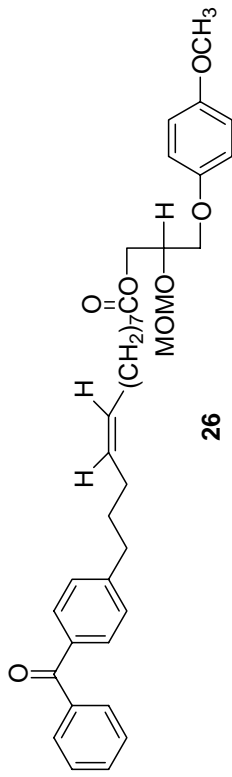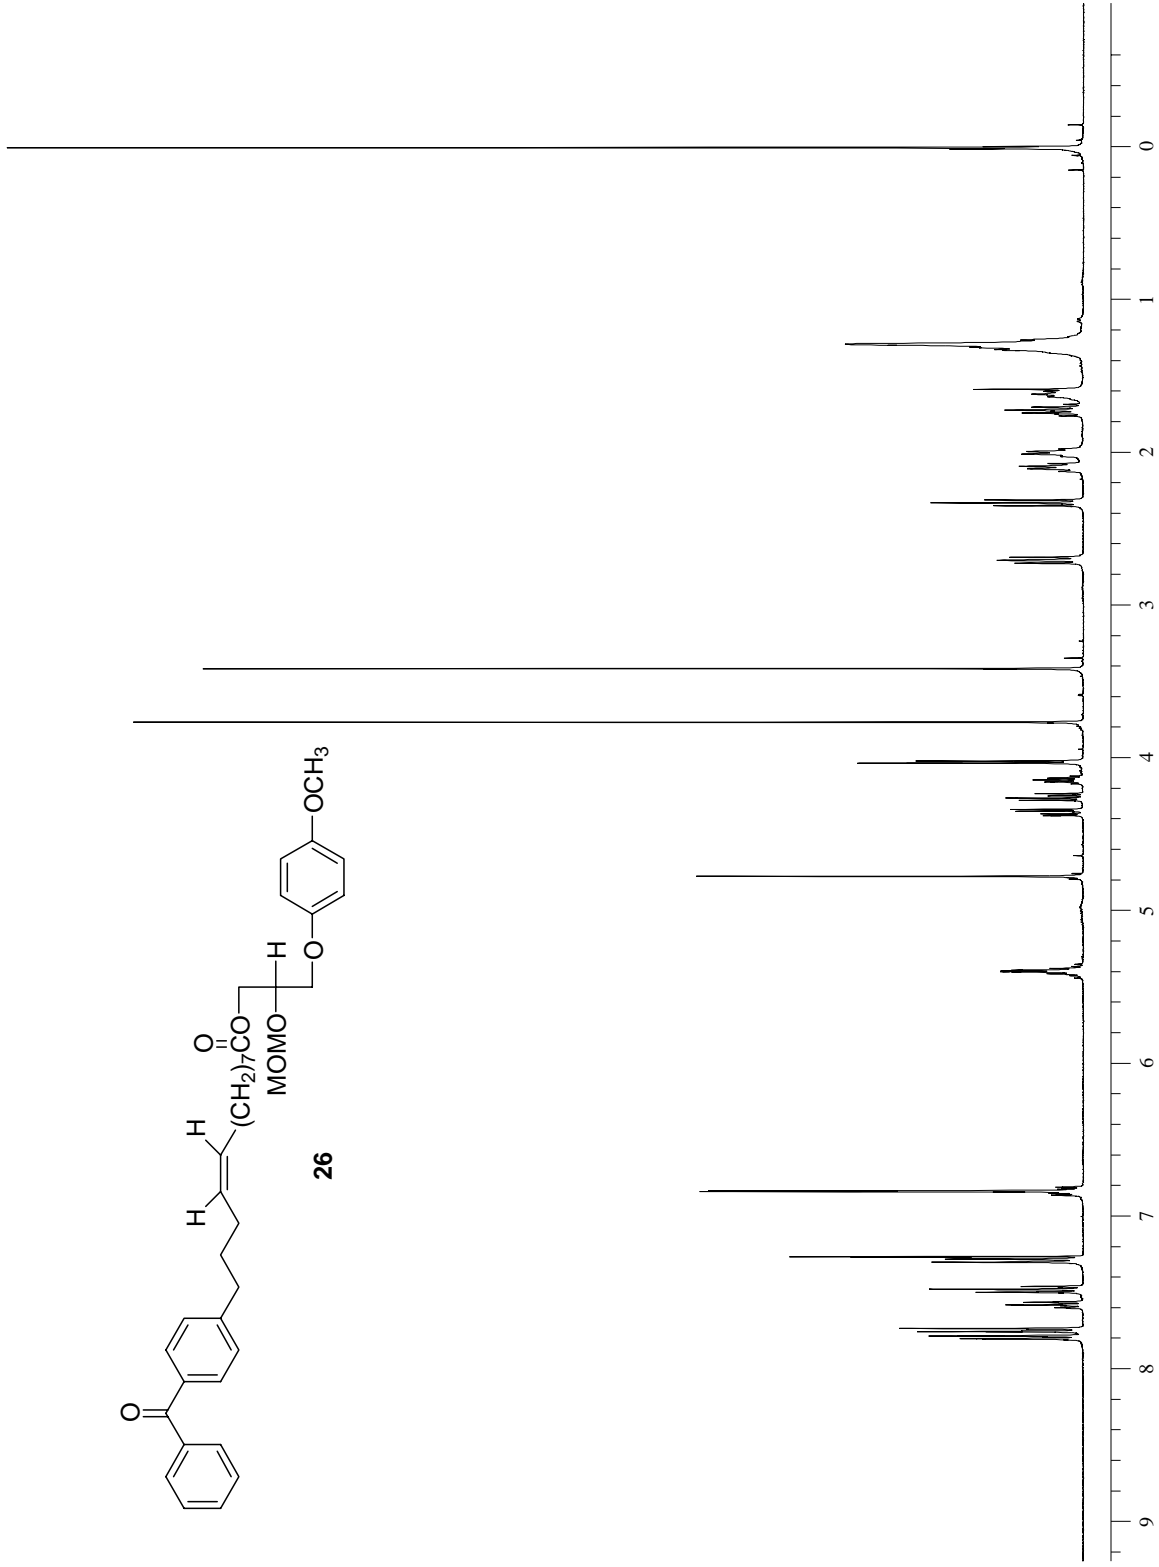



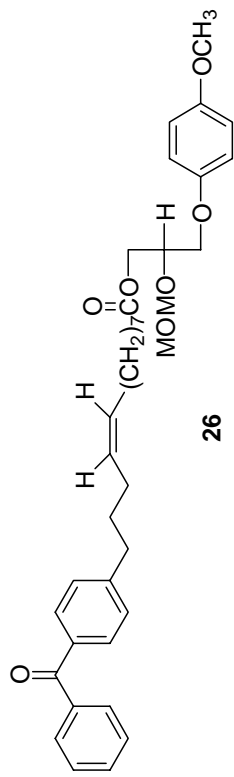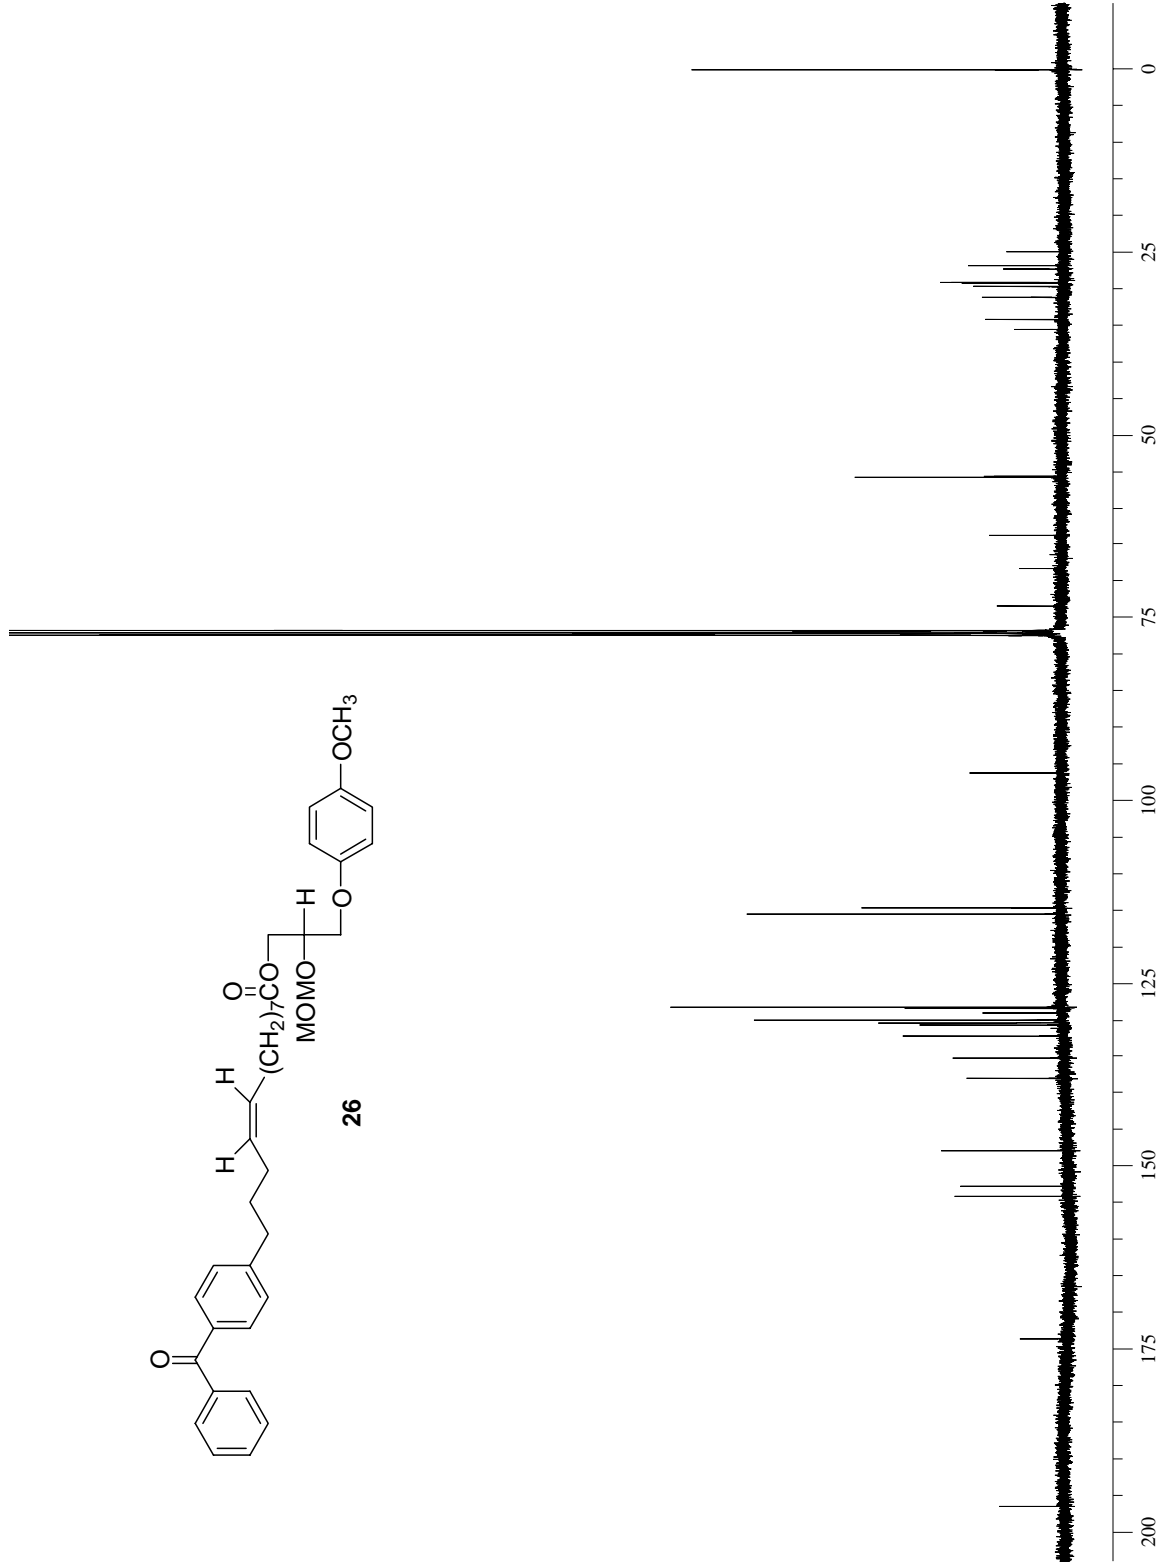

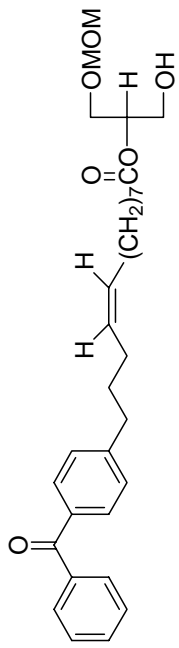

27

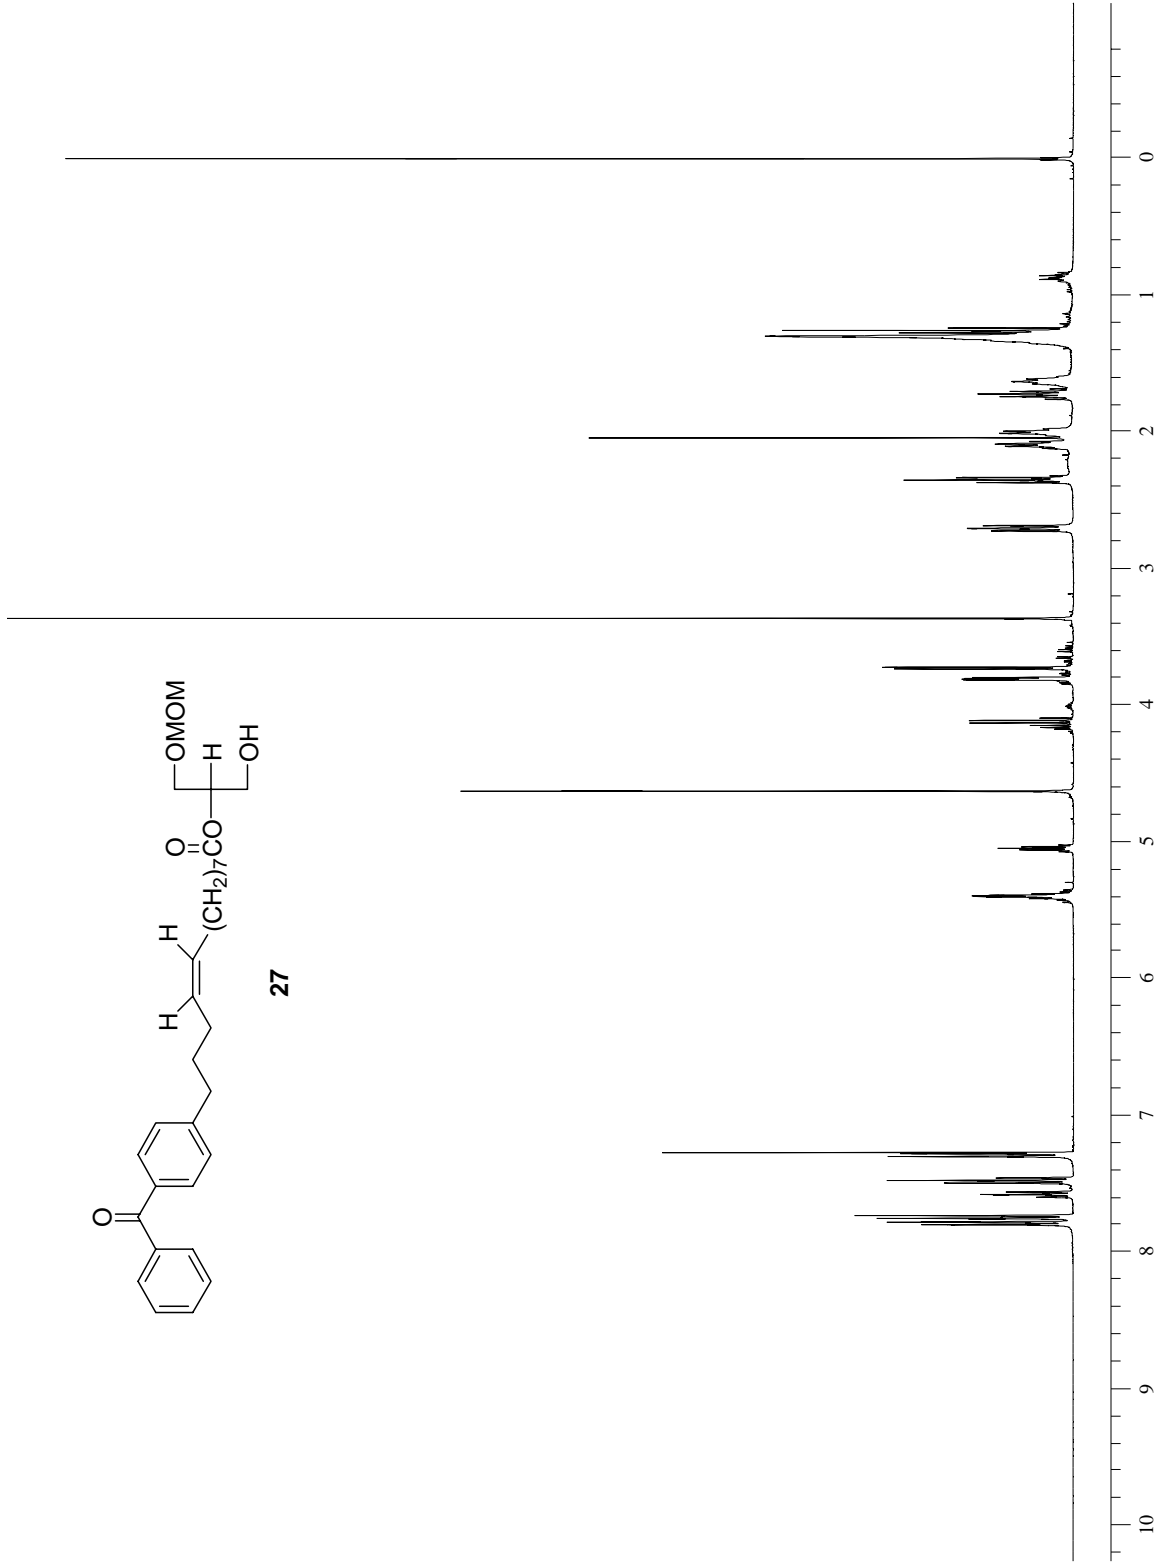

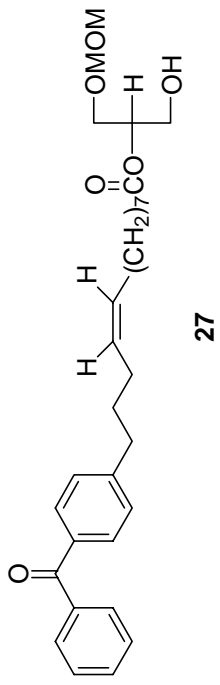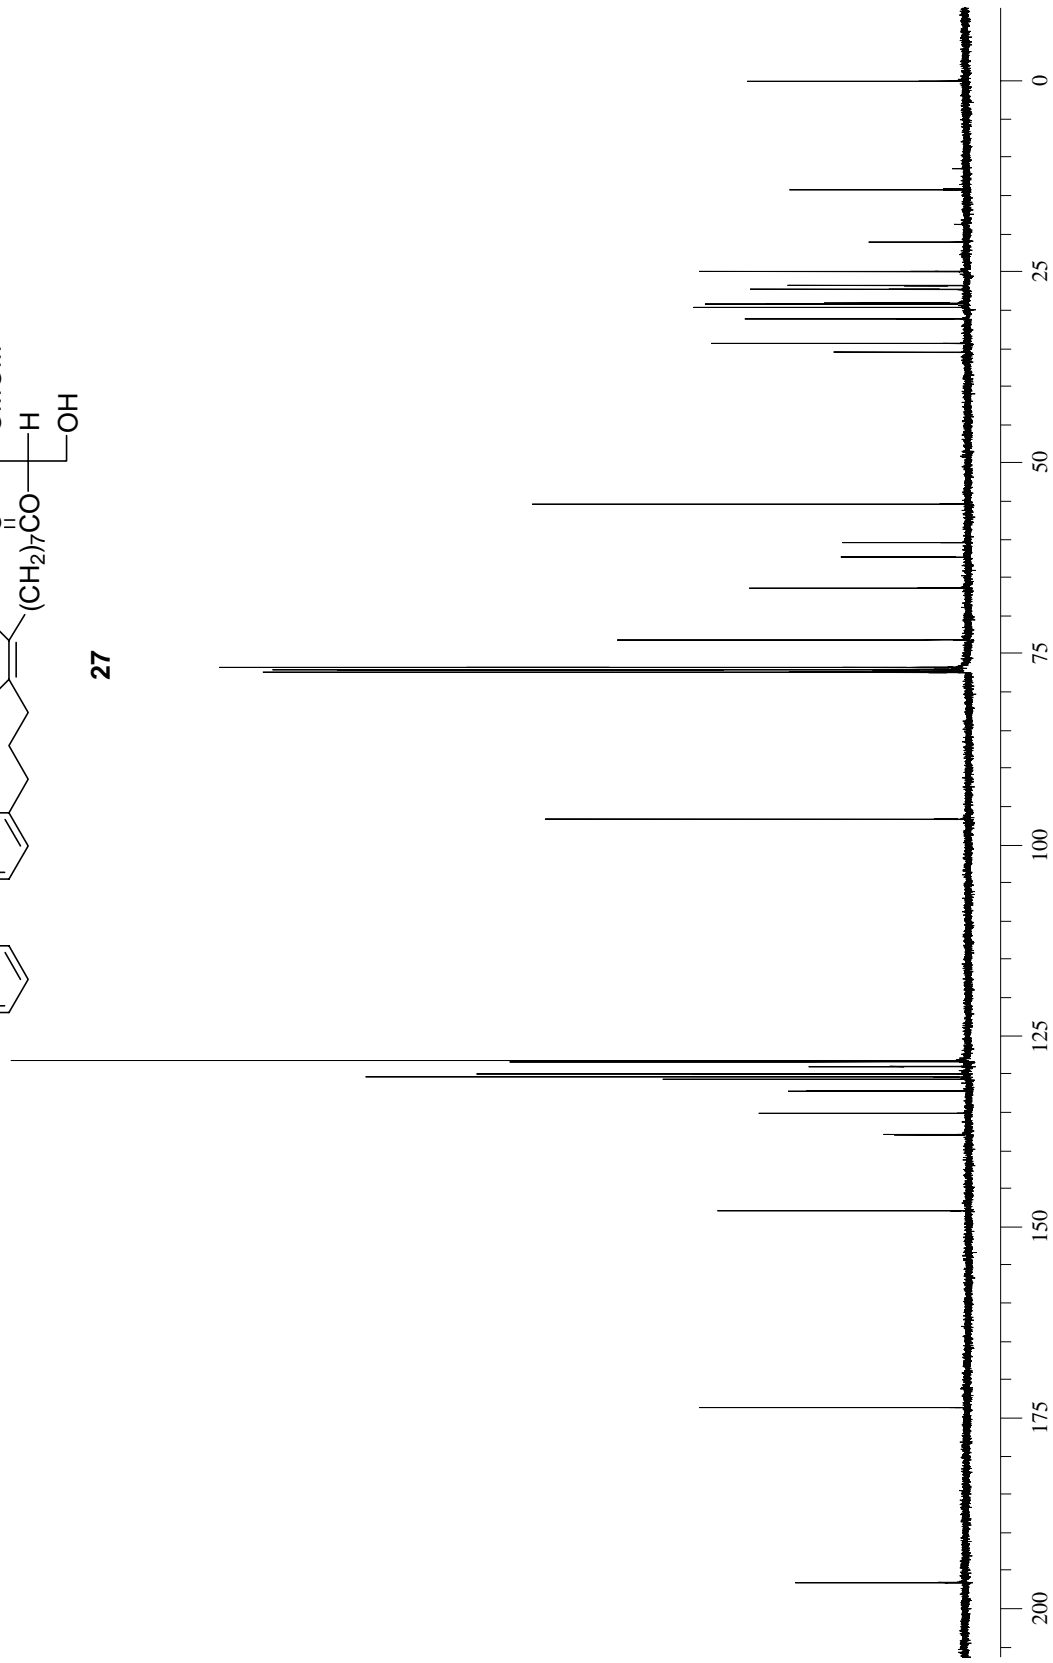

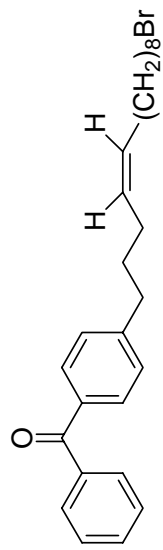

28

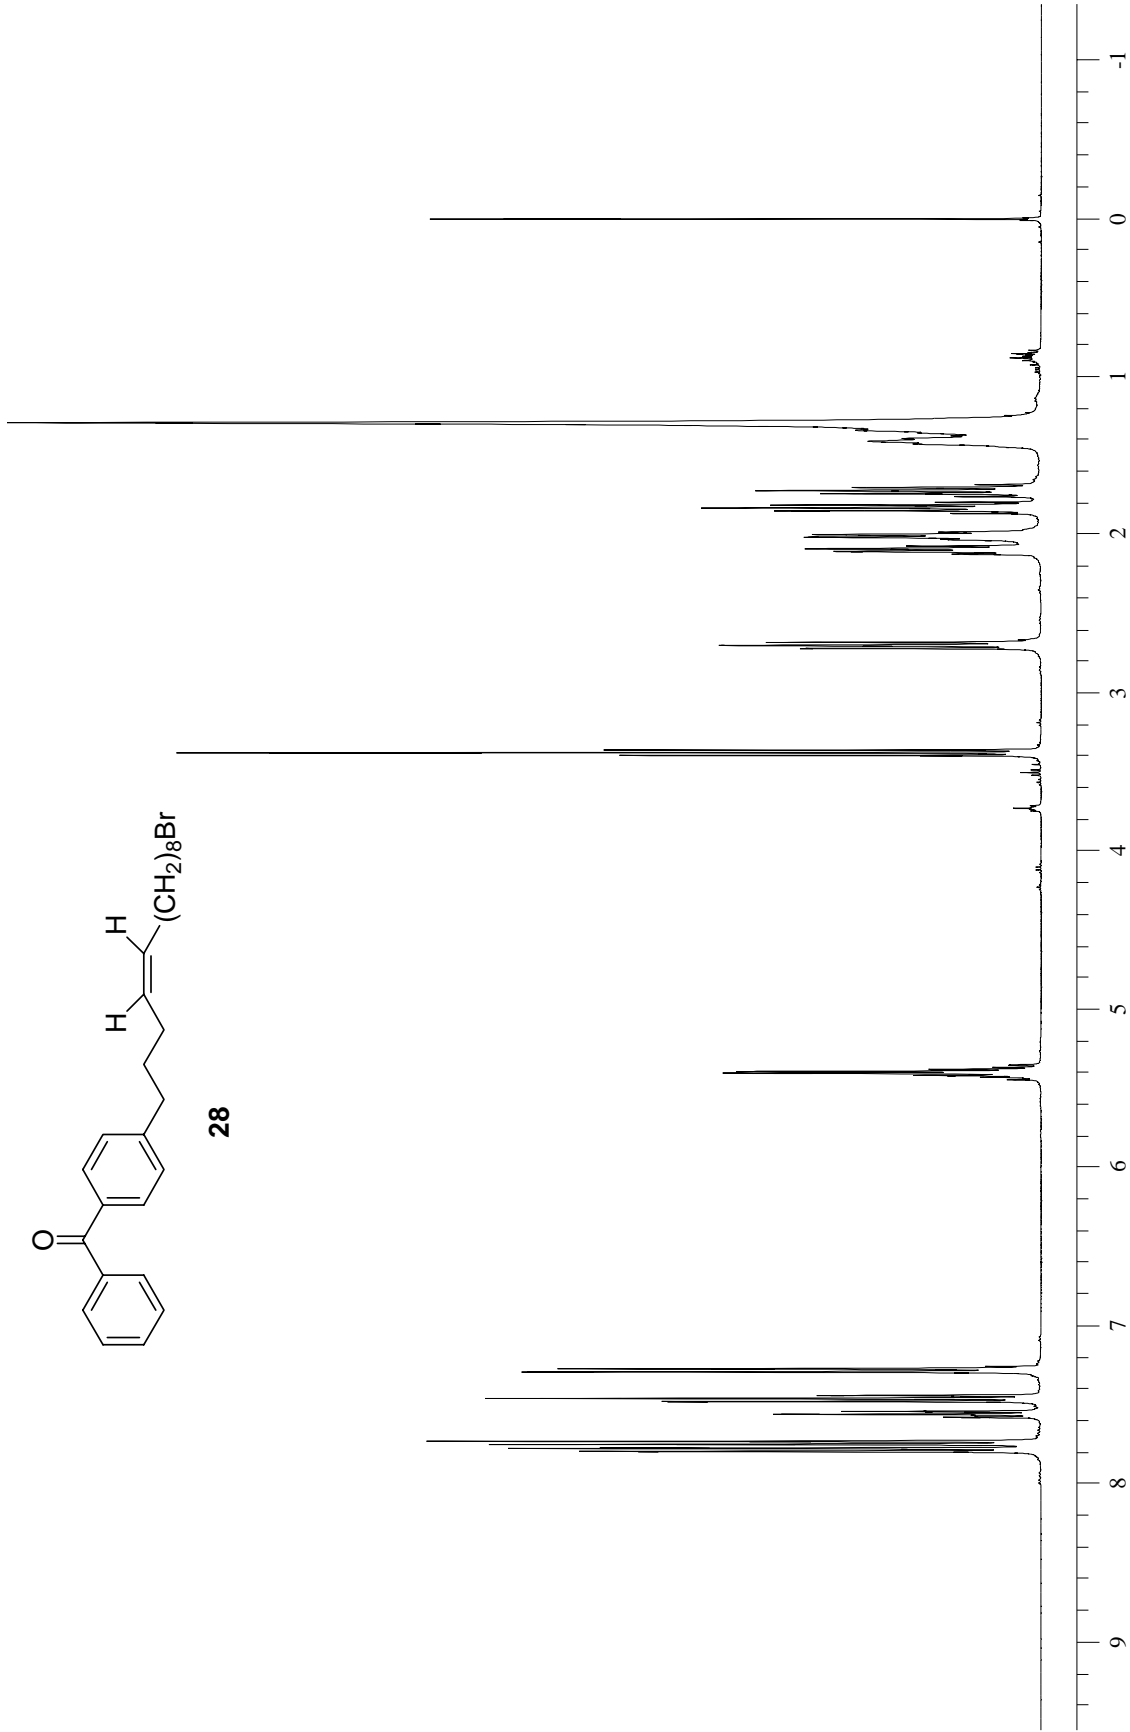

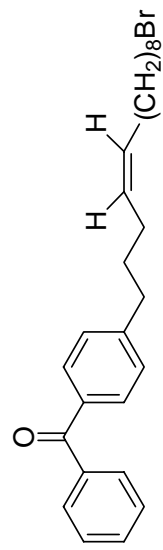

28

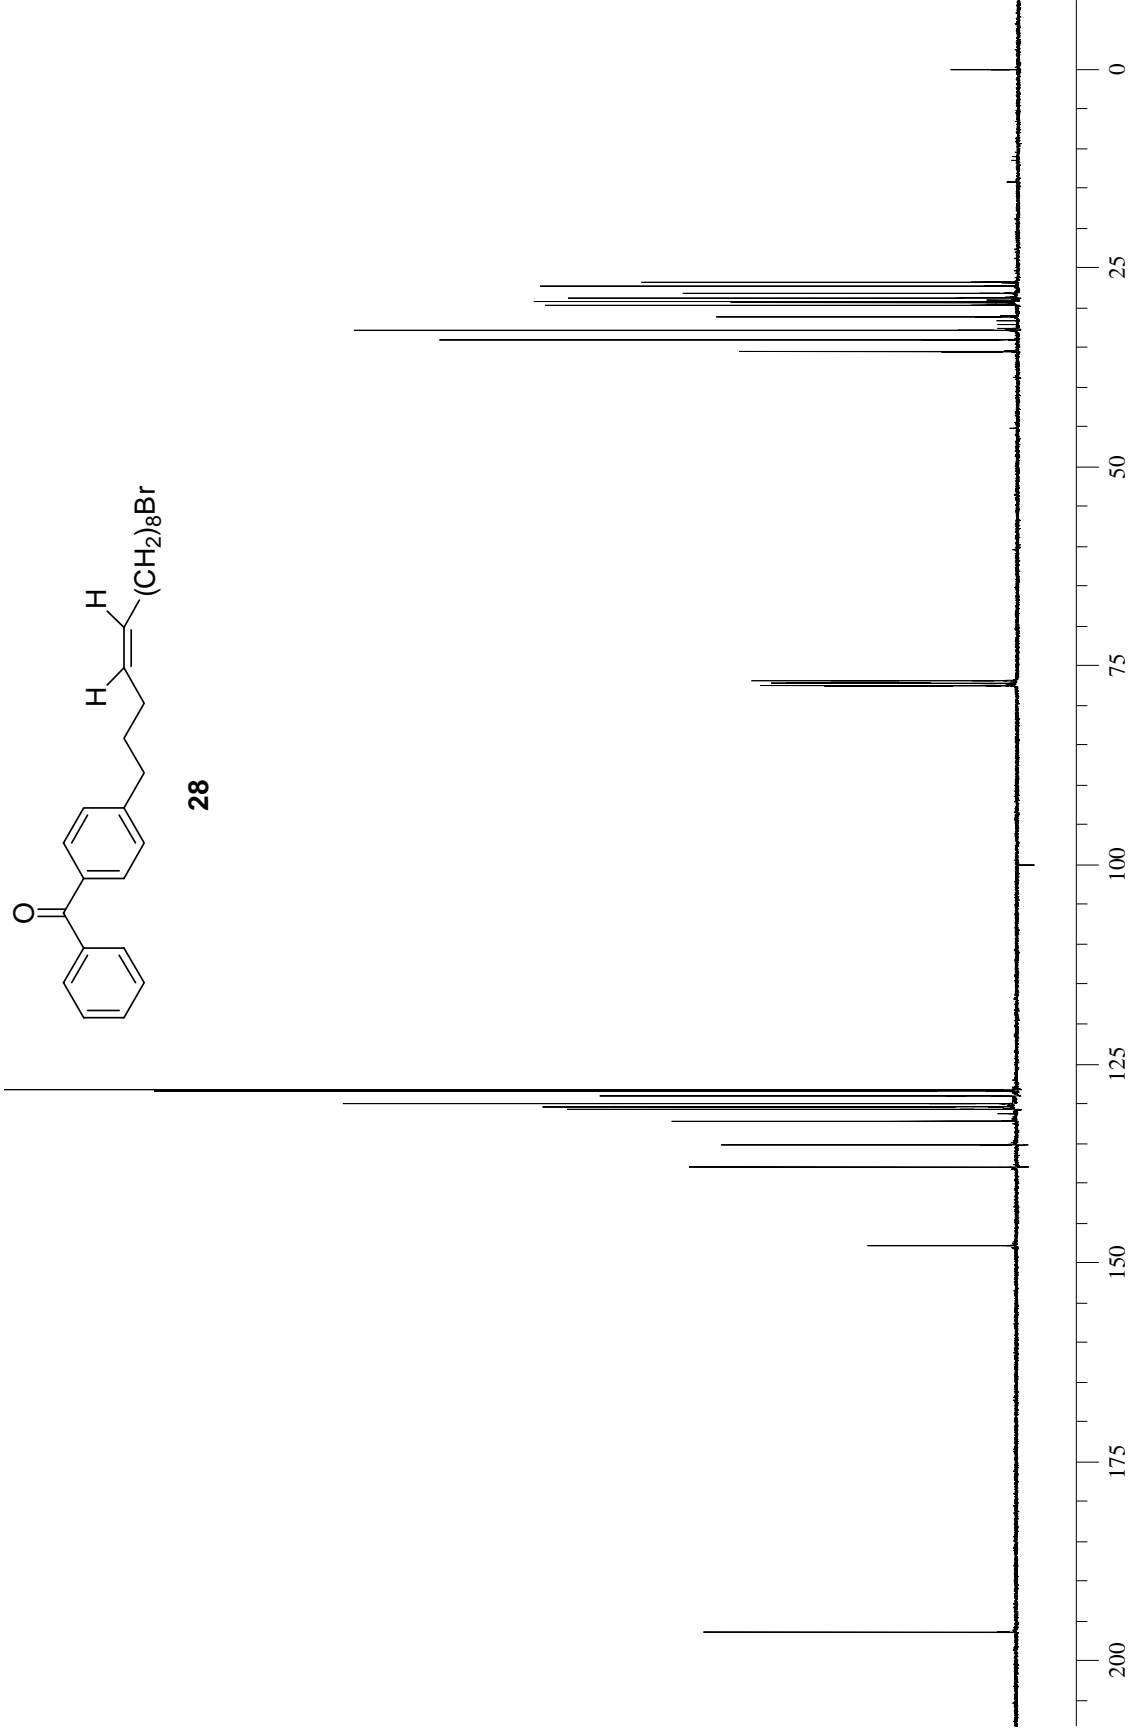



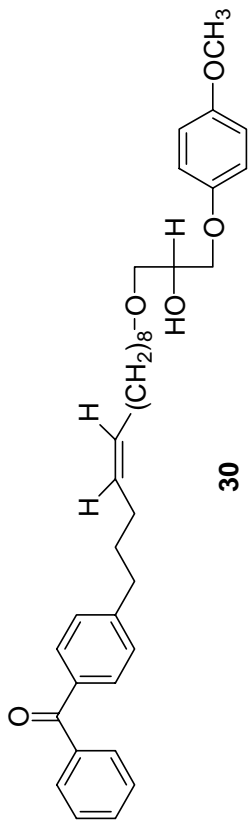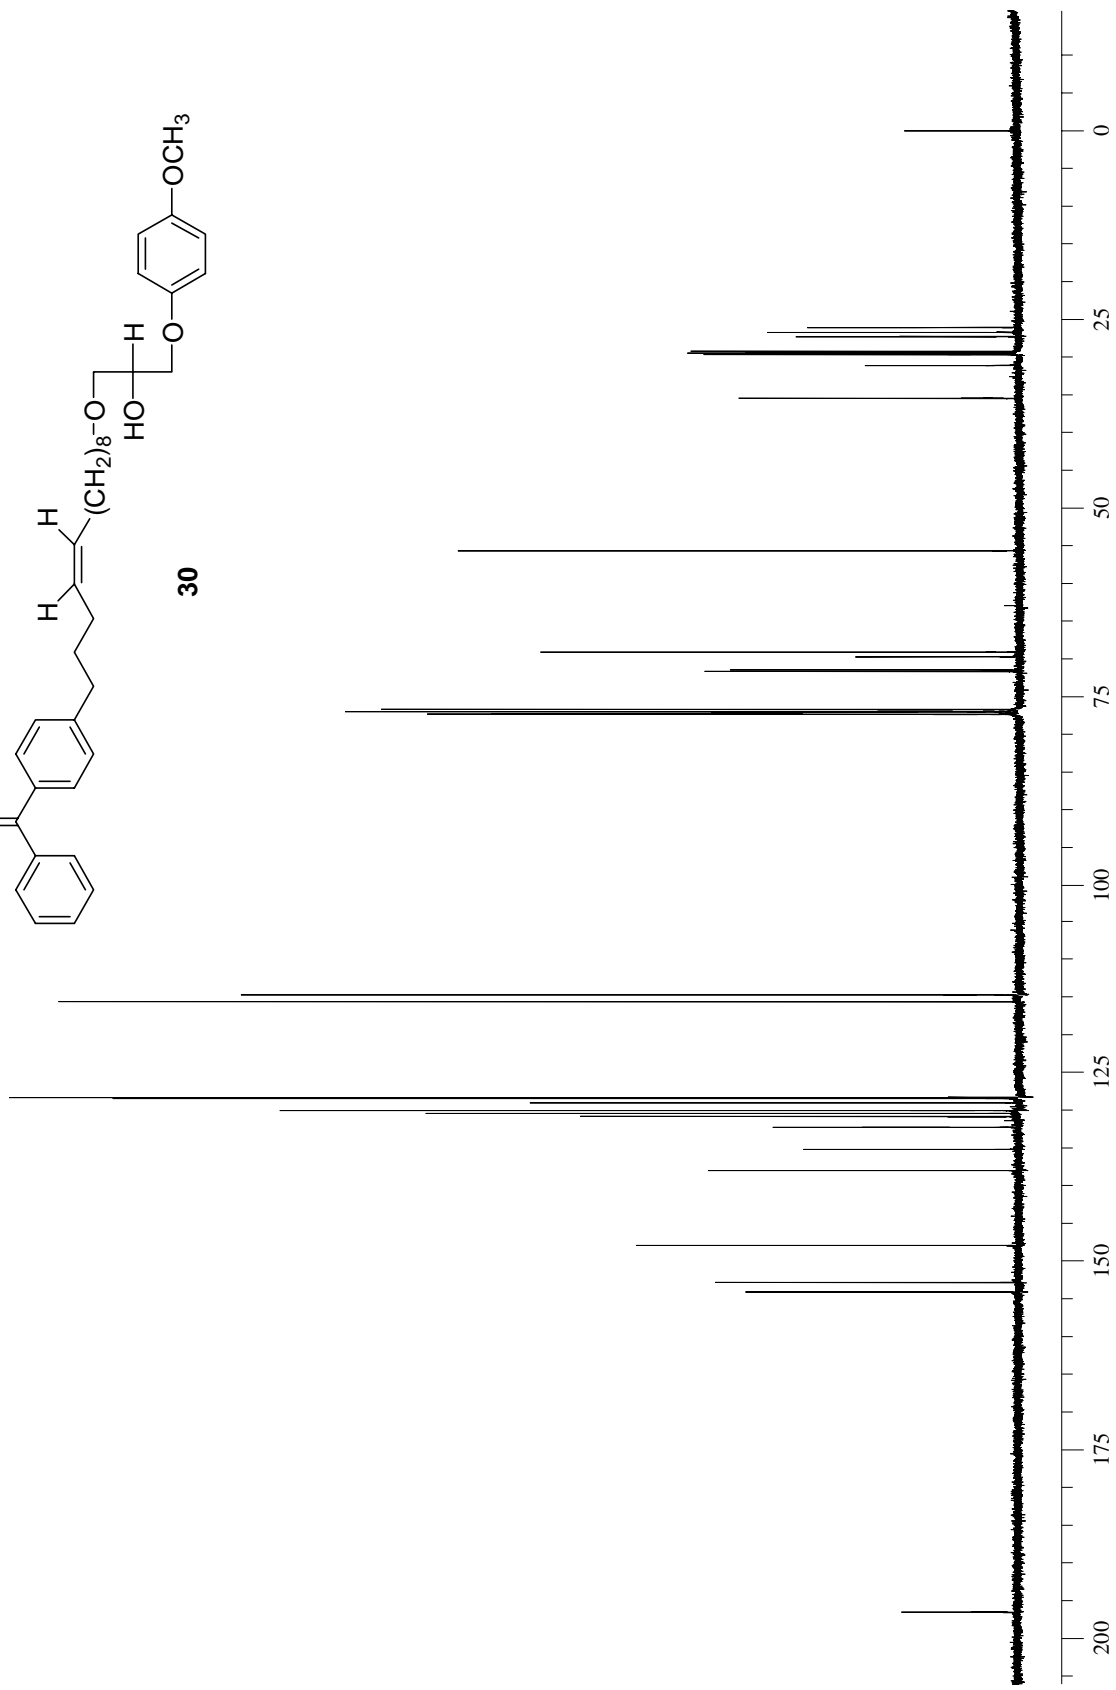

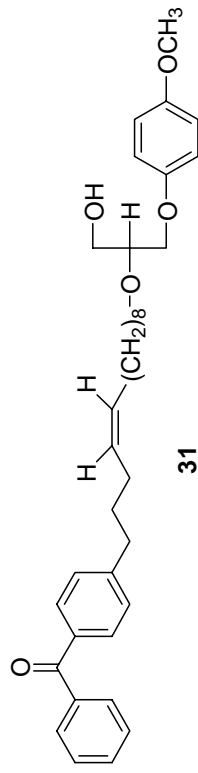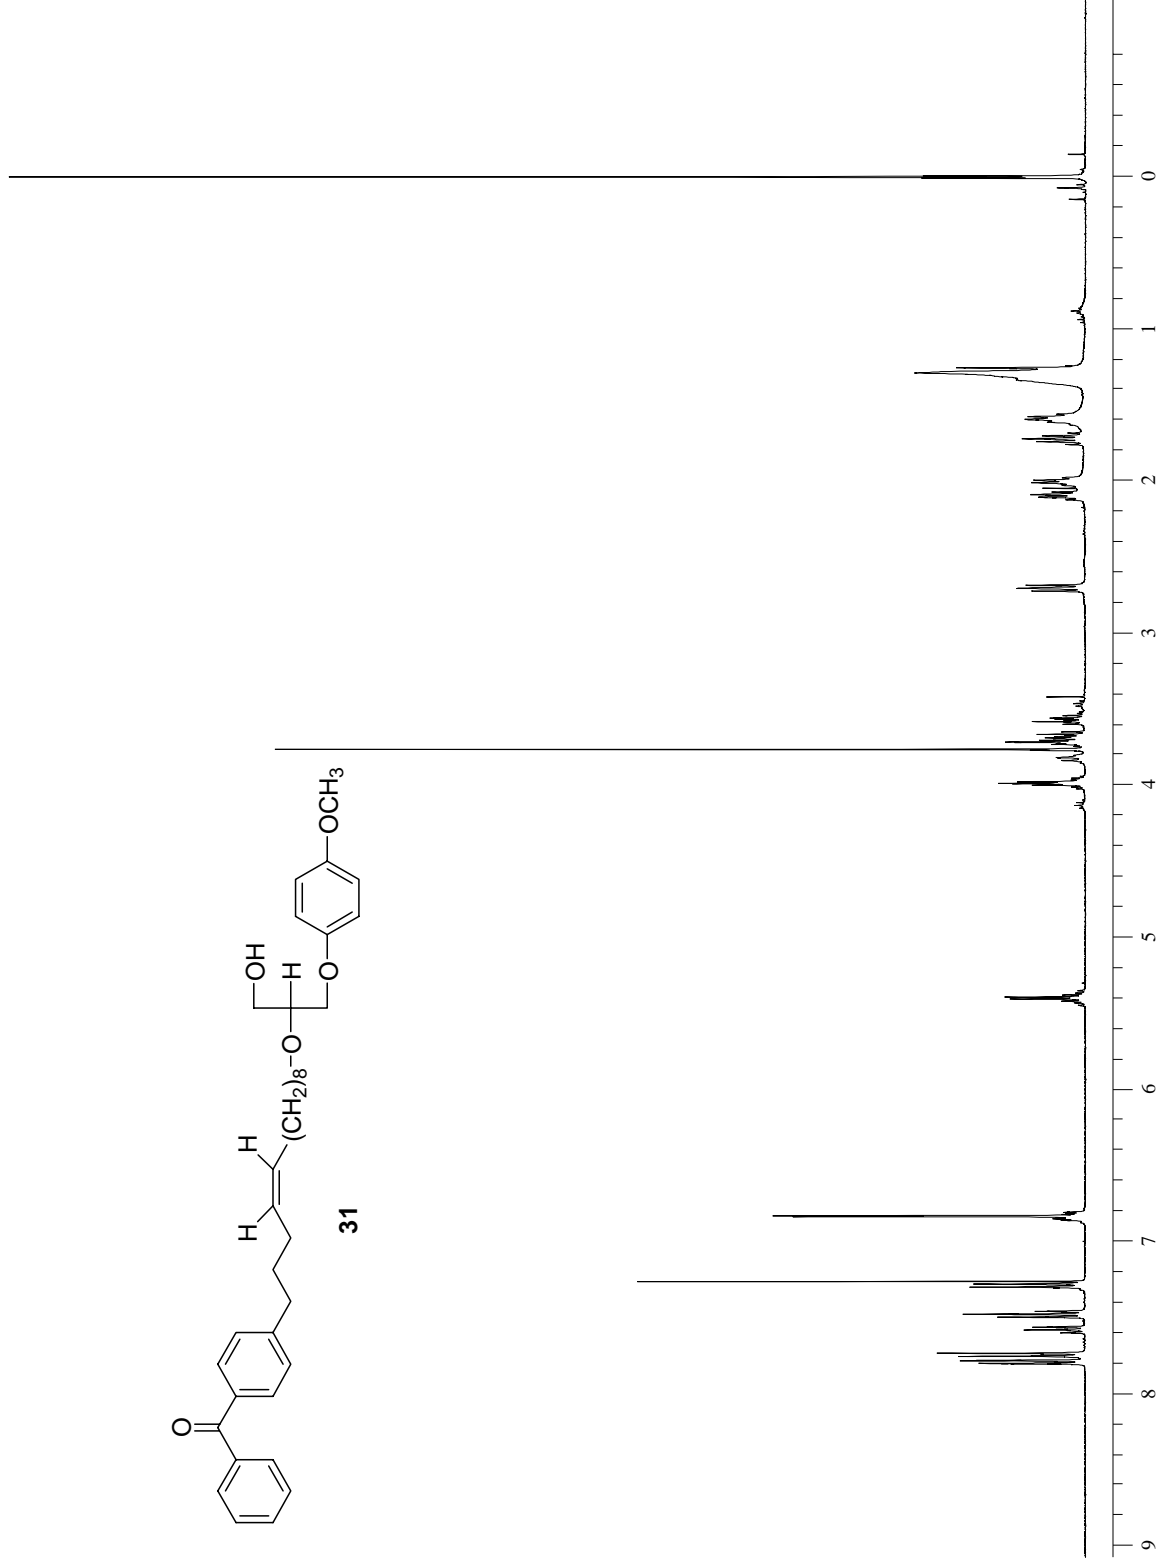



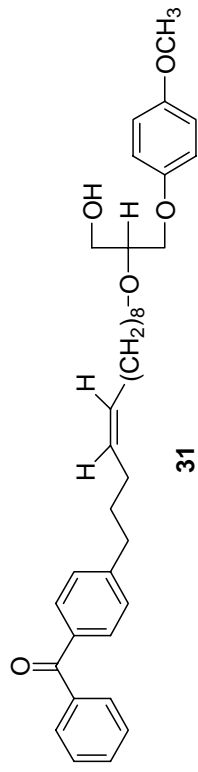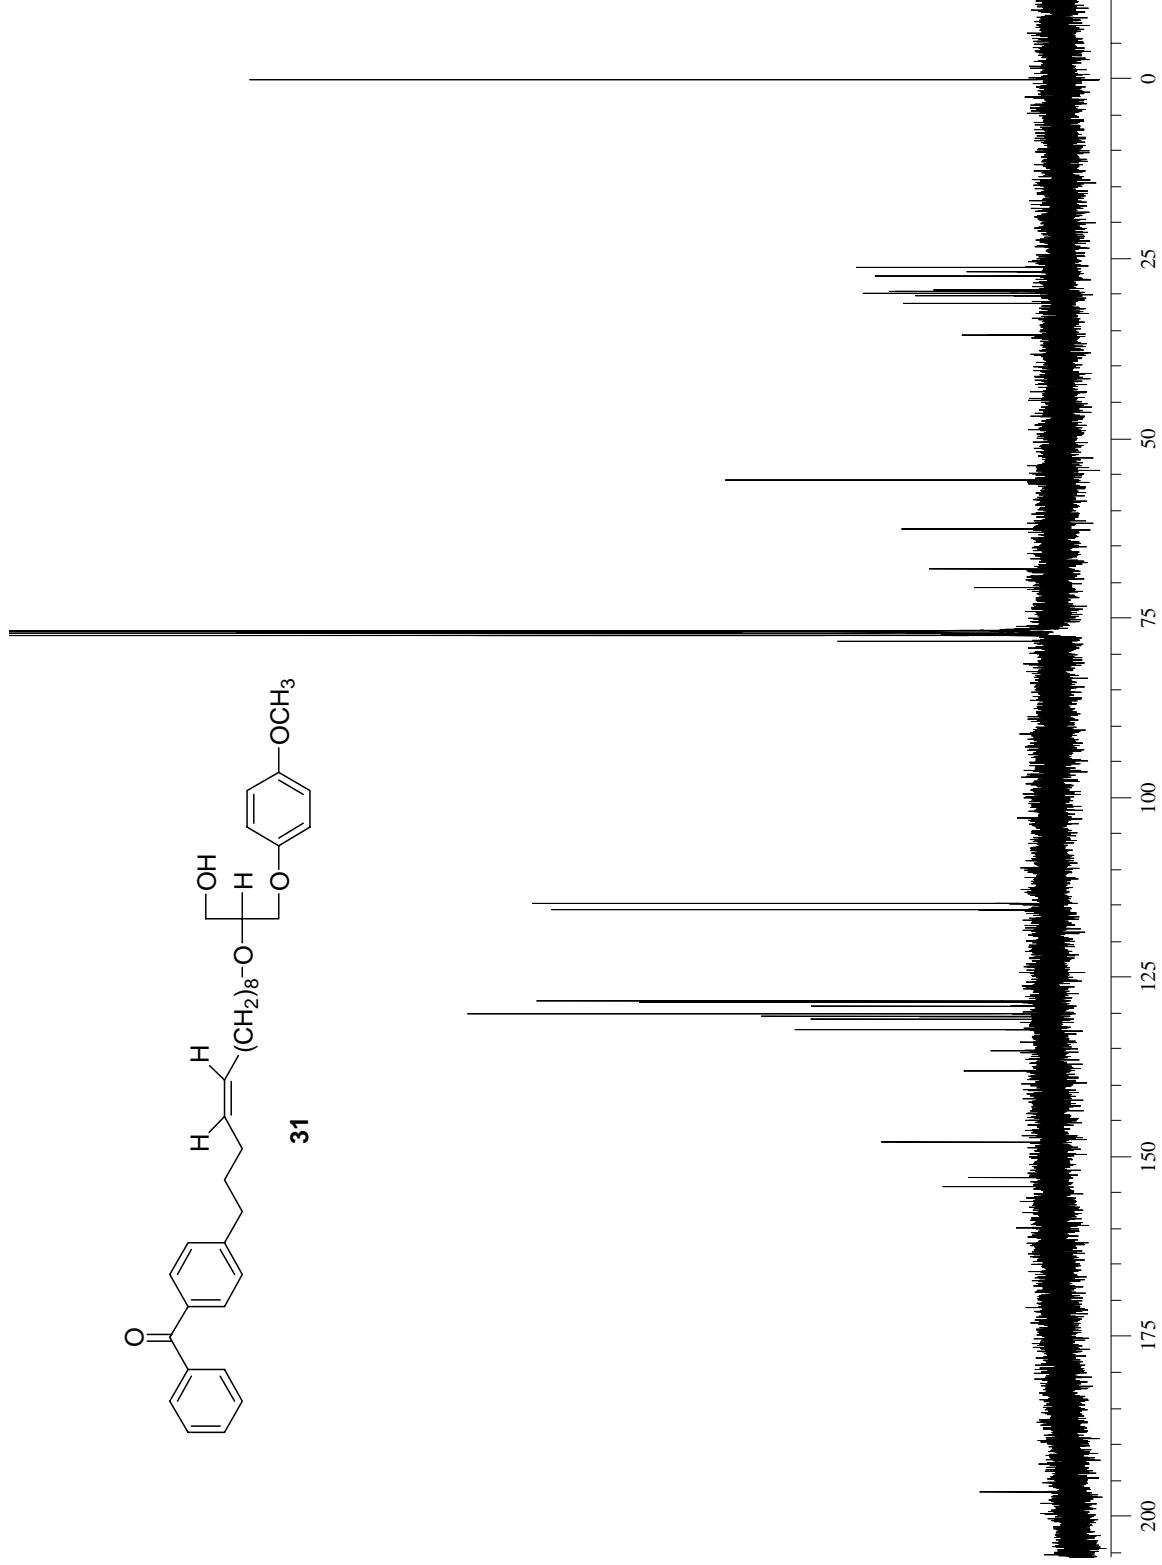

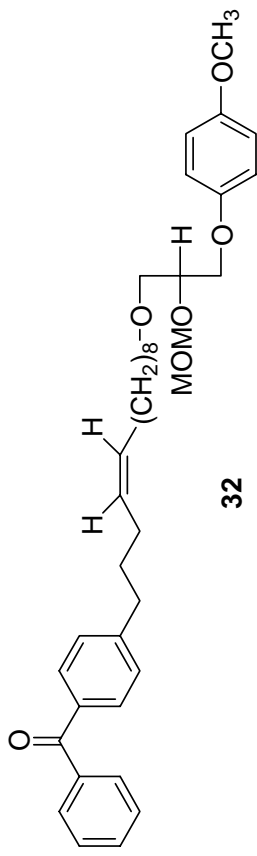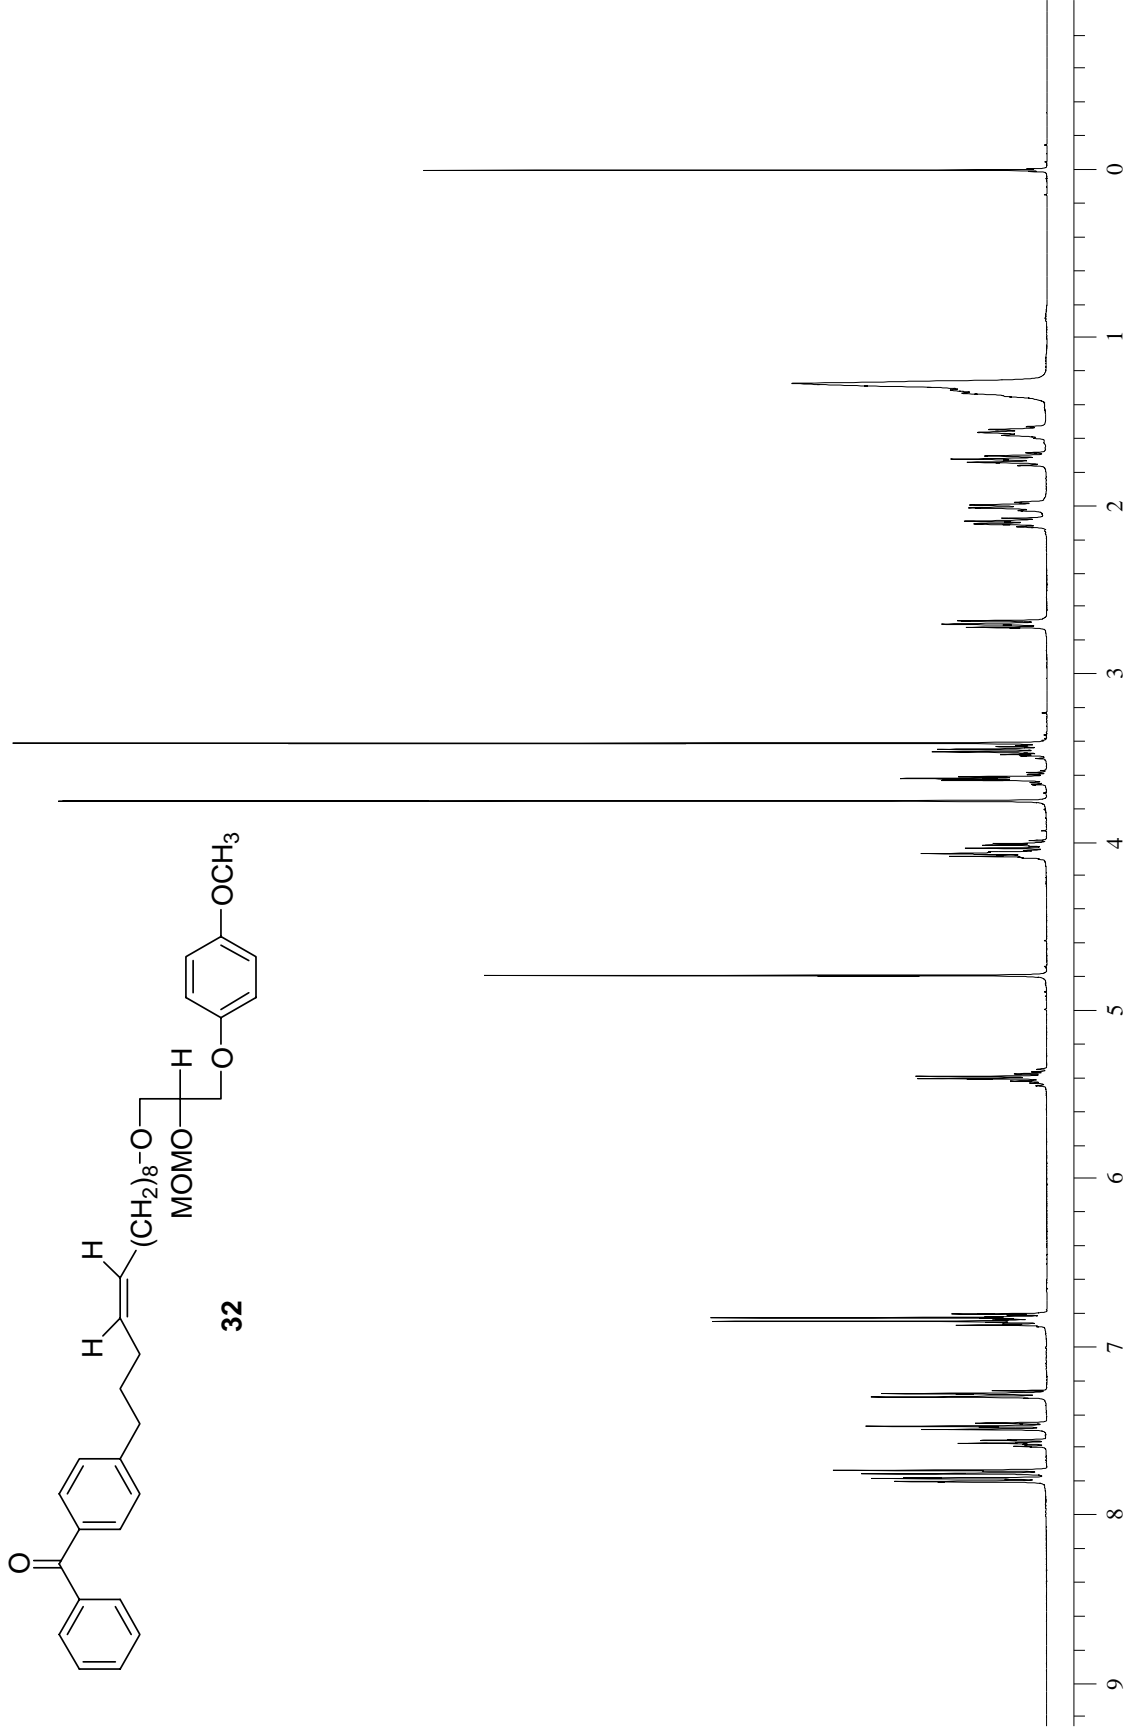

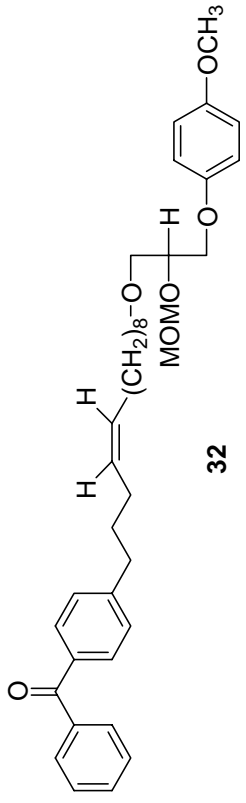

32

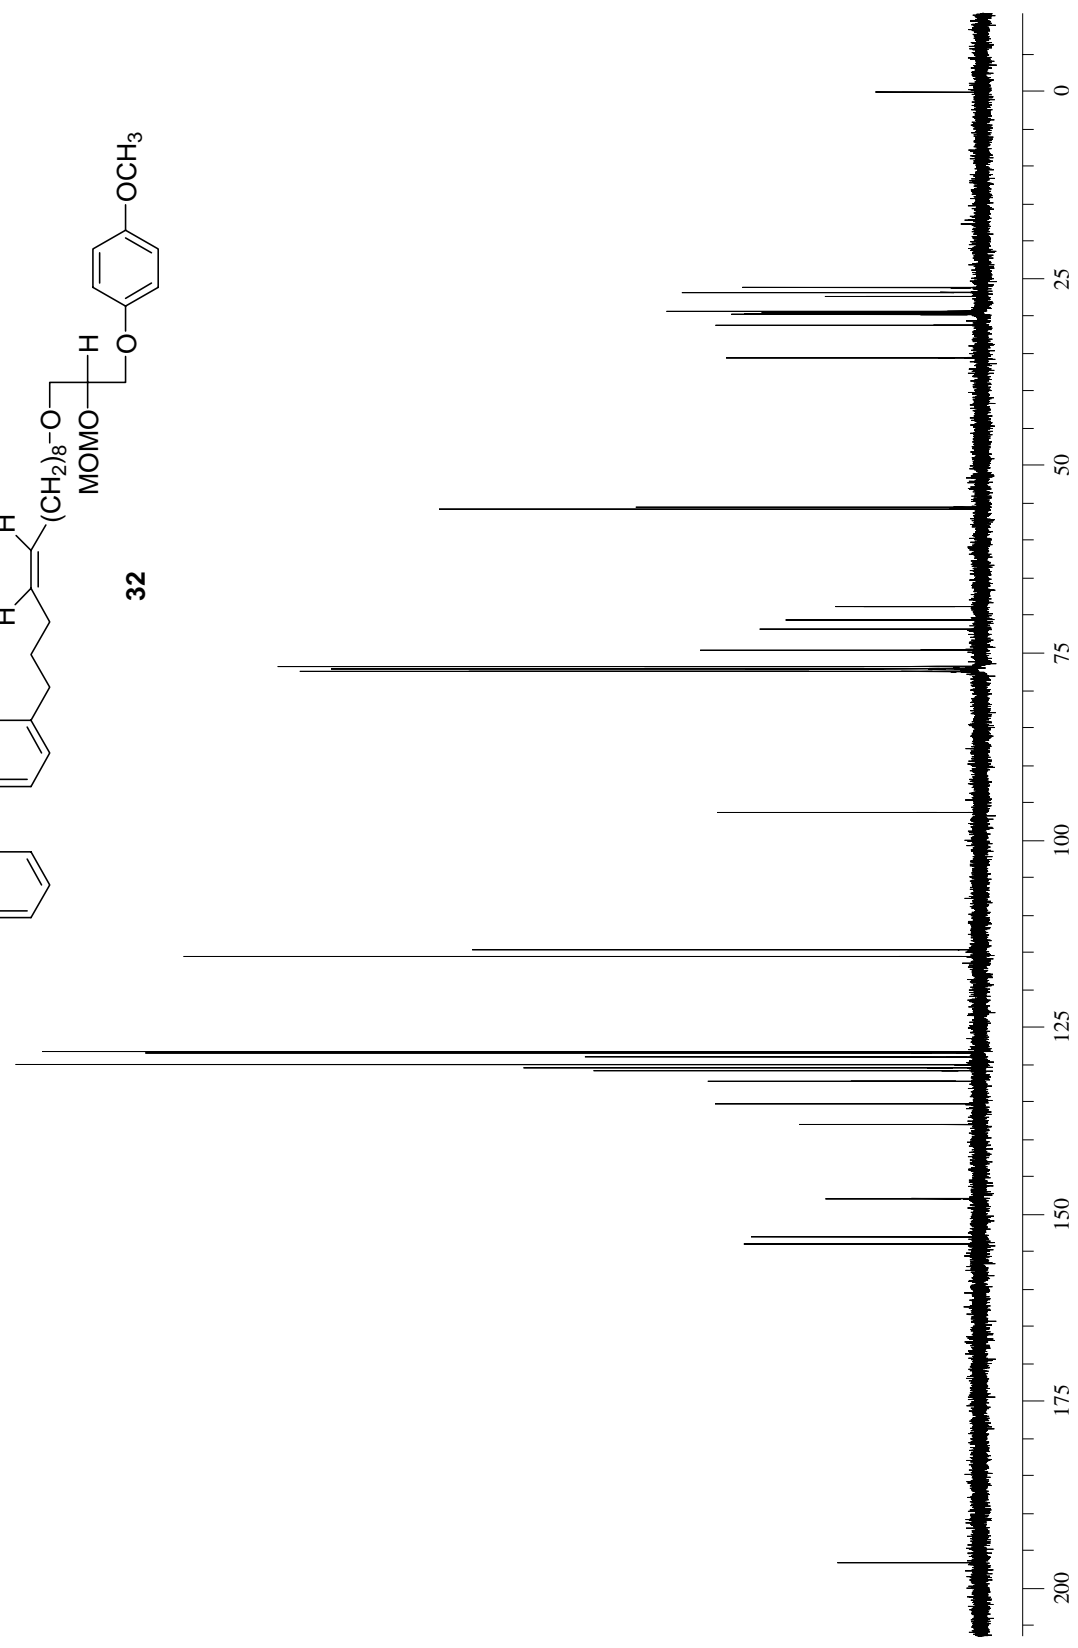

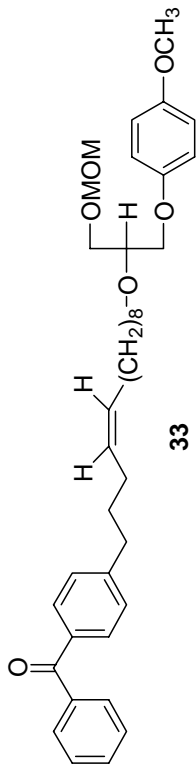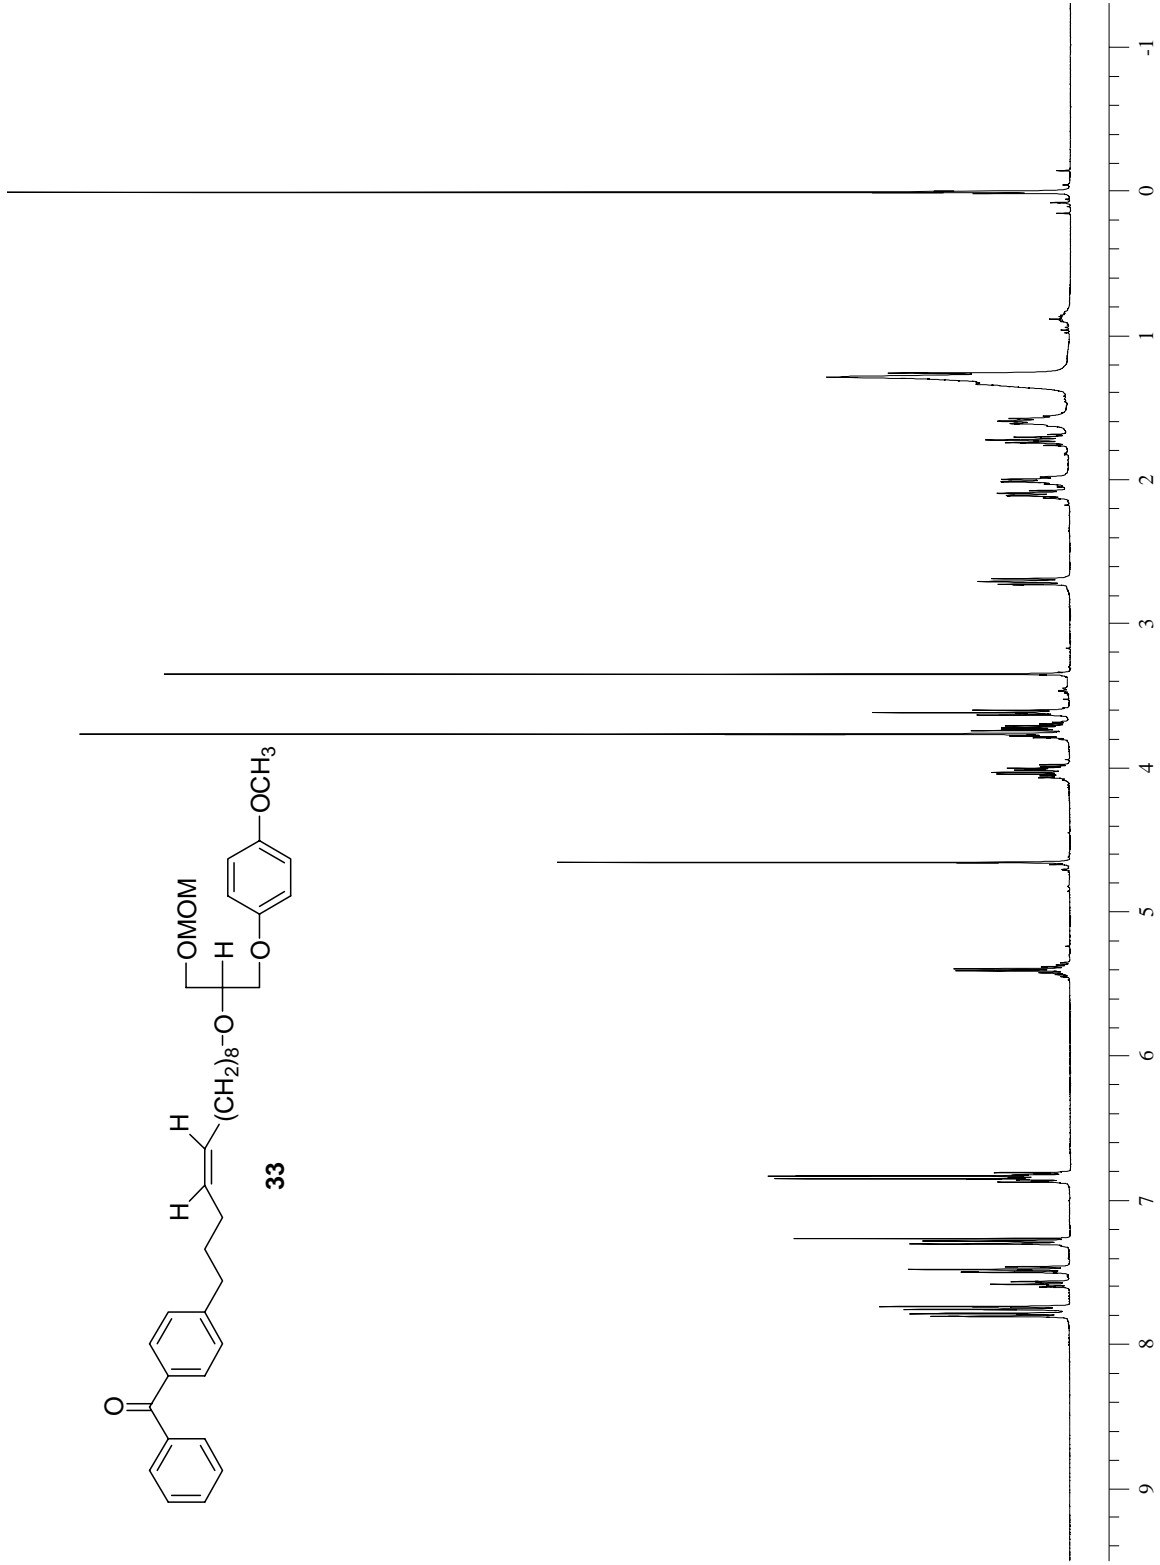

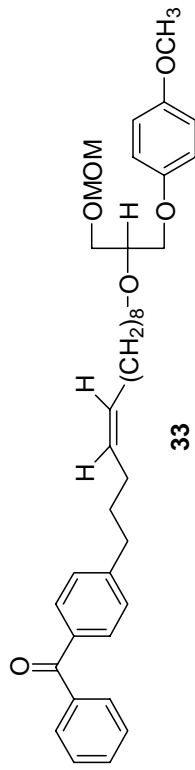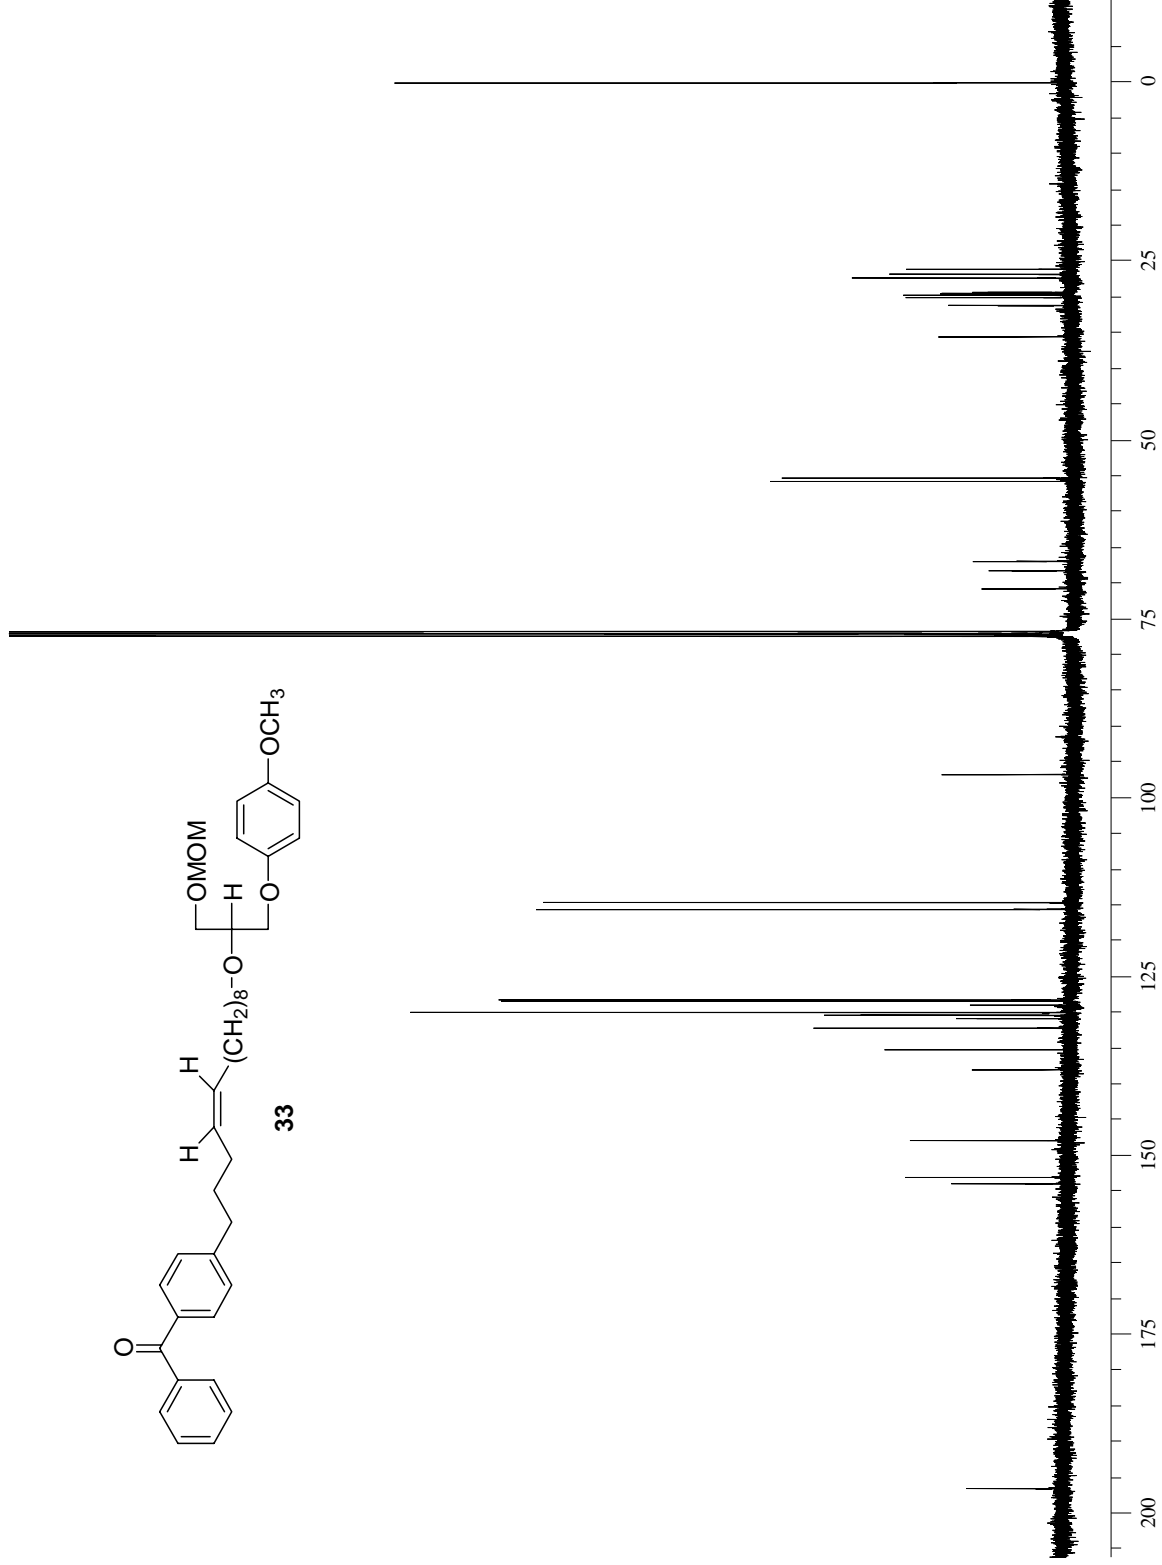

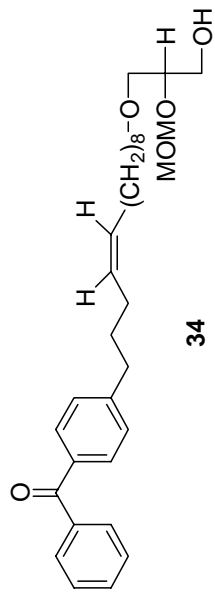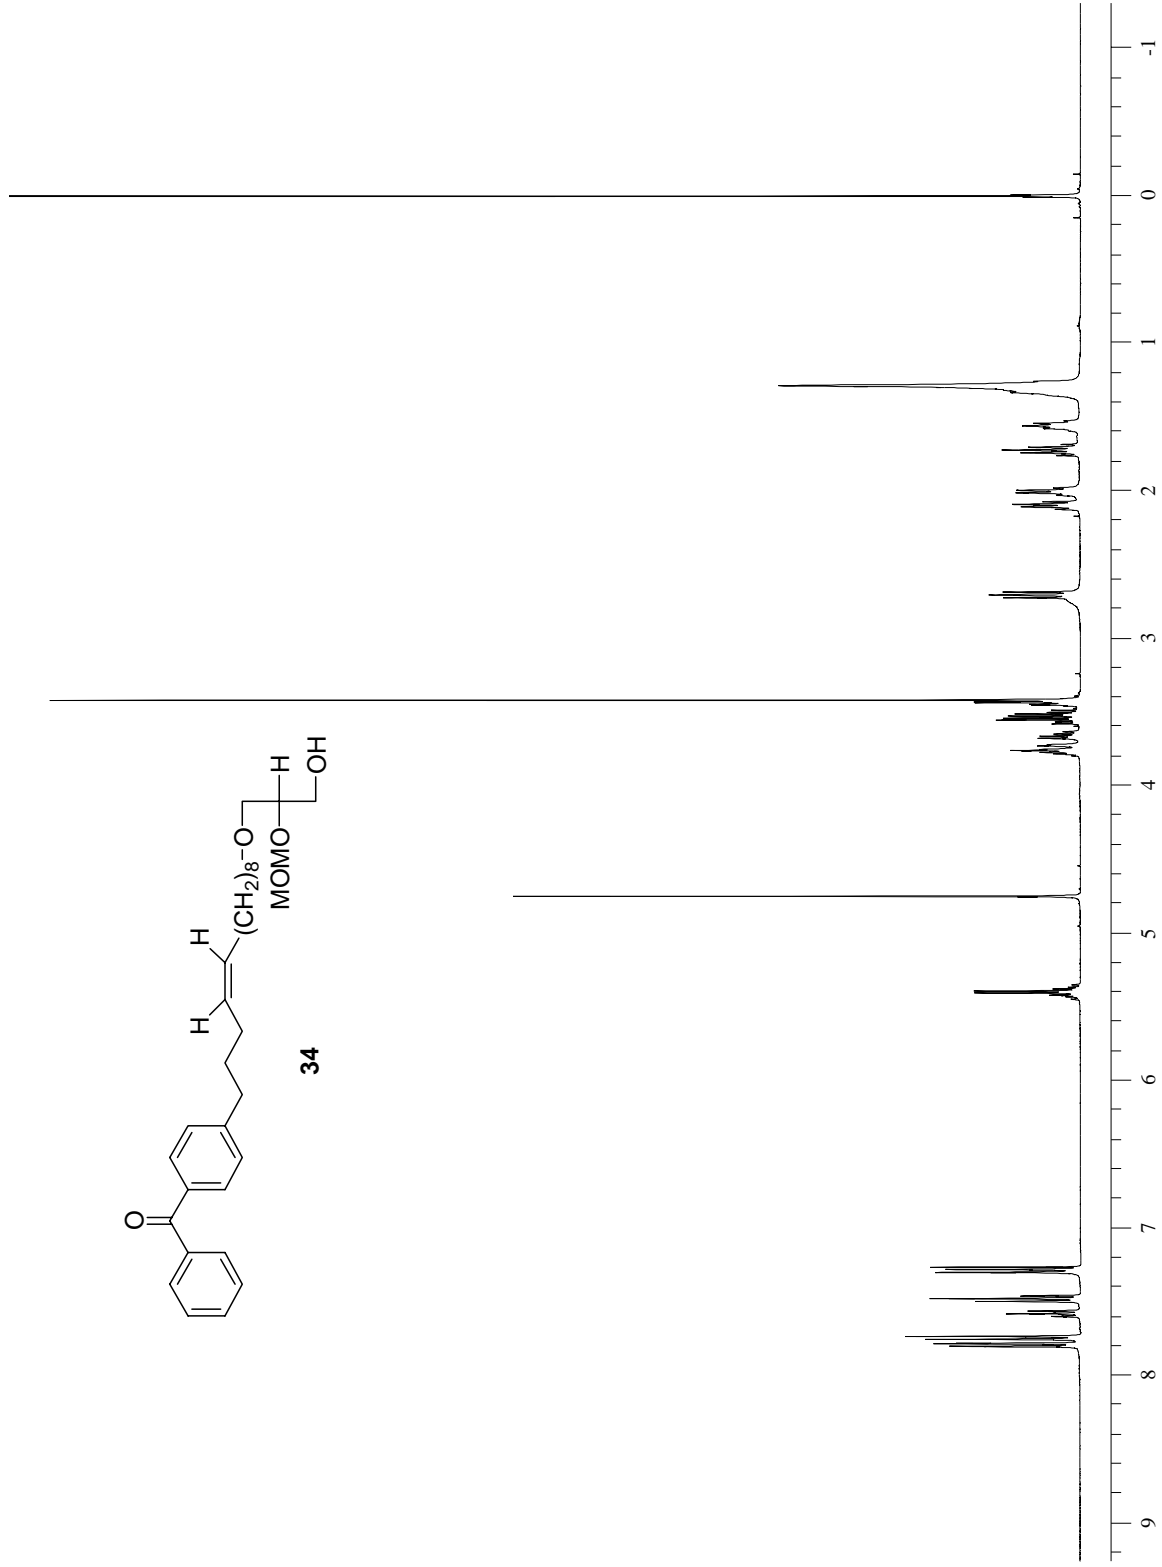

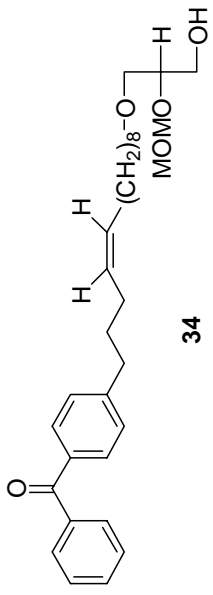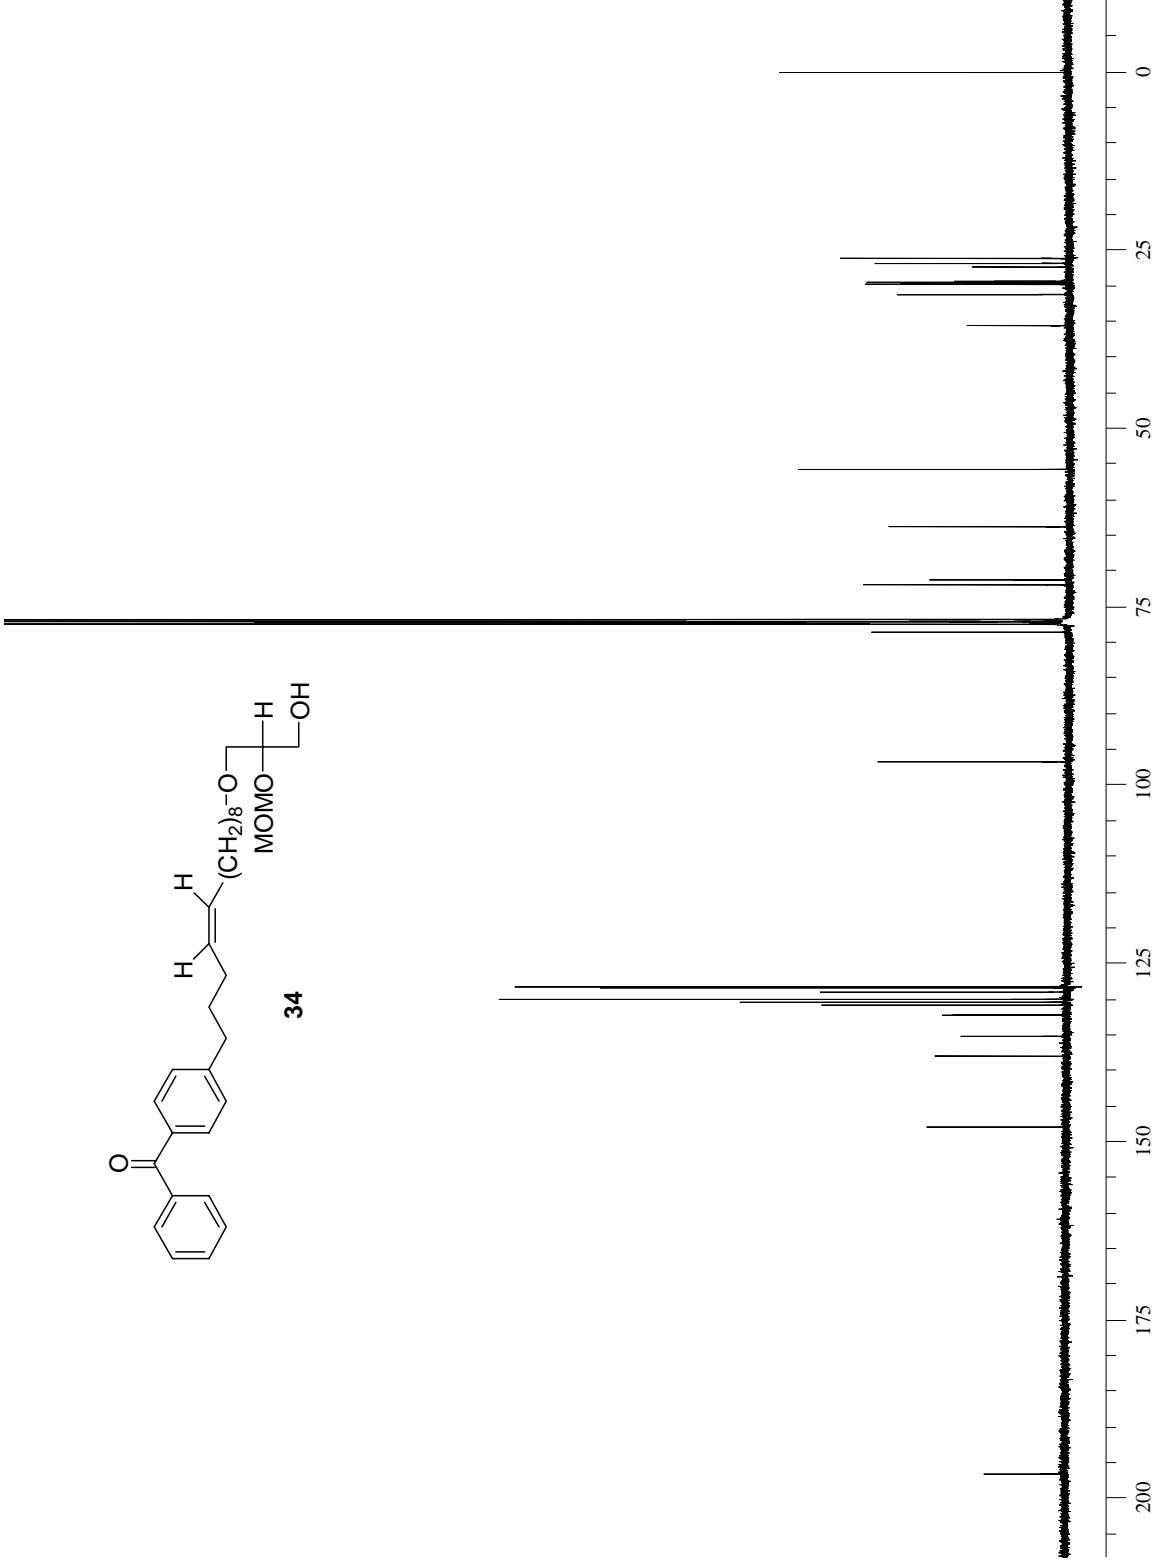

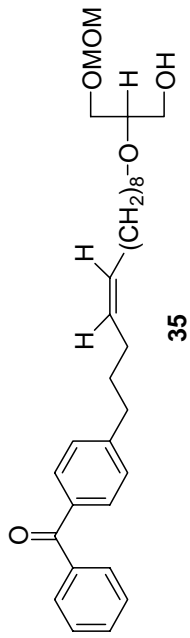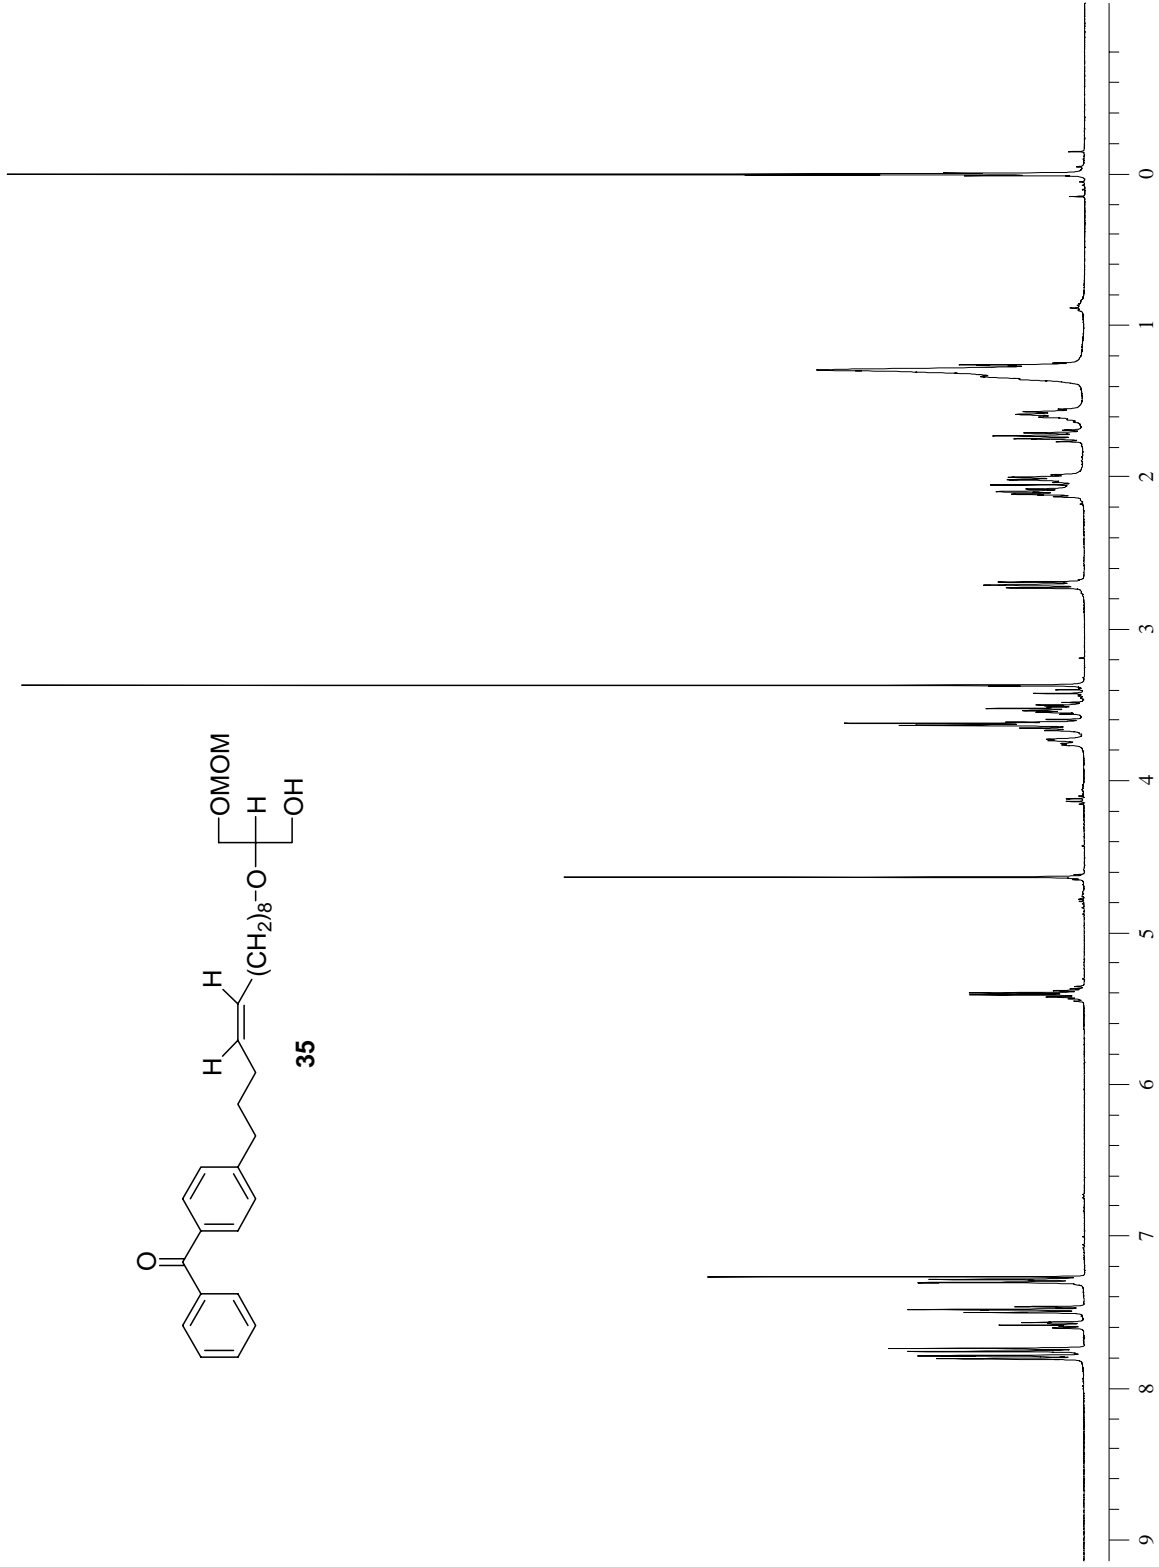



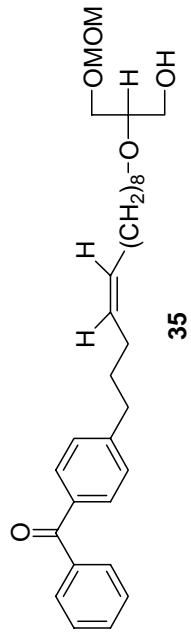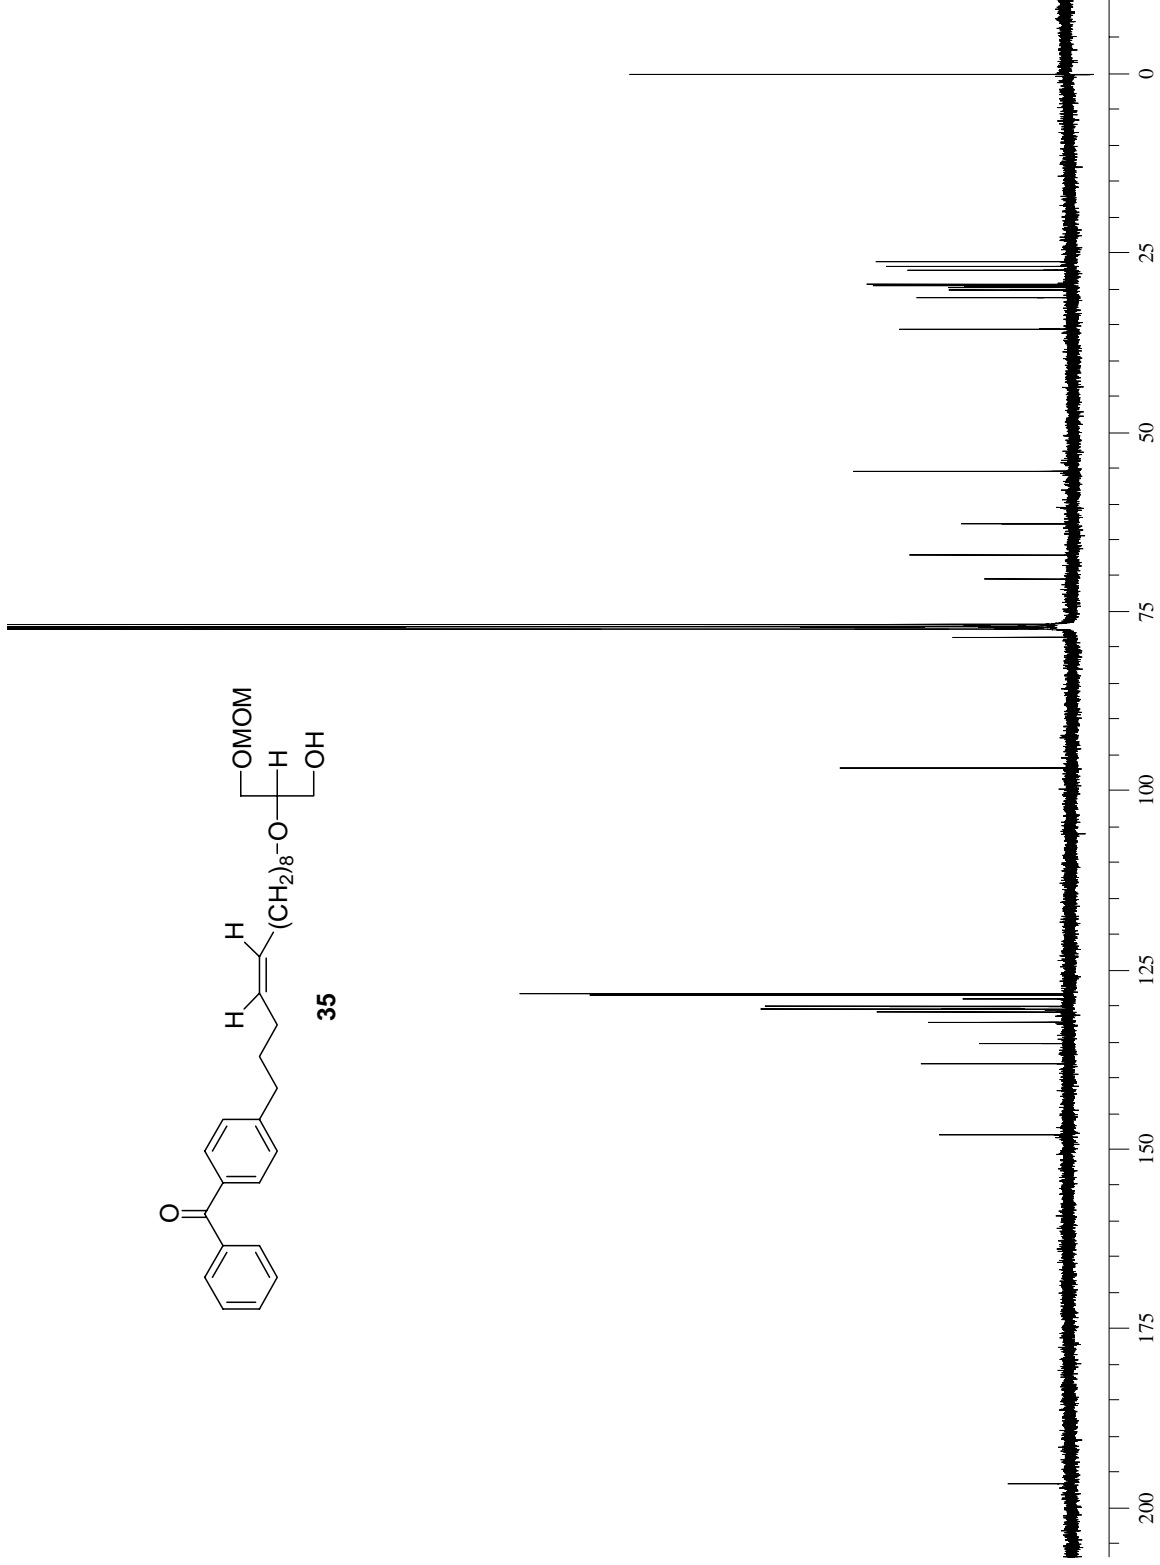

Supplement: NIHMS63107-supplement-1si20051101_03.pdf [file NIHMS63107-supplement-1si20051101_03.pdf]
